# Supplementary material for: Intramolecular [2+2+2] cycloaddition of bis(propargylphenyl)carbodiimides: synthesis of L-shaped π-extended compounds with pyrrolo[1,2-a][1,8]naphthyridine corner units
Source: Royal Society of Chemistry journal article supplement (doi:10.1039/c3cc42792g), 2013-01-01
Supplement: c3cc42792g.pdf [file c3cc42792g.pdf]

## Supplementary Information

### Intramolecular [2+2+2] cycloaddition of dialkynylcarbodiimides: synthesis of L-shaped $\pi$ -extended compounds with pyrrolo[1,2-*a*][1,8]naphthyridine corner units

Takashi Otani, Takao Saito,\* Ryota Sakamoto, Hiroyuki Osada, Akihito Hirahara,  
Naoki Furukawa, Noriki Kutsumura, Tsukasa Matsuo, and Kohei Tamao

Department of Chemistry, Faculty of Science, Tokyo University of Science, Kagurazaka, Shinjuku-ku, Tokyo 162-8601, Japan and Functional Elemento-Organic Chemistry Unit, RIKEN Advanced Science Institute, 2-1 Hirosawa, Wako, Saitama 351-0198, Japan

E-mail: tsaito@rs.kagu.tus.ac.jp

(Submitted to *Chem. Commun.*)

#### Contents

|                                         |           |
|-----------------------------------------|-----------|
| 1. Synthesis                            | ••••• S 2 |
| 2. NMR Spectra                          | ••••• S12 |
| 3. X-ray Crystallographic Analysis      | ••••• S37 |
| 4. Photophysical Data                   | ••••• S39 |
| 5. Cyclic Voltammetry                   | ••••• S43 |
| 6. Theoretical Calculations             | ••••• S47 |
| 7. Full Listing for Text Reference (11) | ••••• S56 |

## 1. Synthesis

### 1.1 General Information

All melting points were determined on a Yanaco melting point apparatus and are uncorrected. Infrared spectra were recorded on a Horiba FT-710 model spectrophotometer.  $^1\text{H}$  and  $^{13}\text{C}$  NMR spectral data were obtained with a Bruker Avance-600, a JEOL JNM-LA 500, or a JEOL JNM-AL 300 instrument and chemical shifts are reported in ppm down field from tetramethylsilane (TMS) using an internal standard of TMS,  $\text{CDCl}_3$ , or  $\text{CD}_2\text{Cl}_2$ . Accurate mass was measured by high-resolution electrospray ionization (ESI) mass to determine an elemental formula by comparing calculated exact mass. The elemental analyses (C, H, and N) were performed at the Advanced Technology Support of RIKEN Advanced Science Institute and the Microanalytical Laboratory of the University of Tokyo. Iminophosphoranes **S1a**<sup>S1</sup> and **S1b**,<sup>S1</sup> and 3-azido-2-naphthalenecarboxaldehyde (**S3**)<sup>S2</sup> were synthesized according to procedures previously described in the literature.

### 1.2 Synthesis of Carbodiimides

#### 1.2.1 Synthesis of Carbodiimides 1

**Scheme S1. Synthesis of Carbodiimides 1**

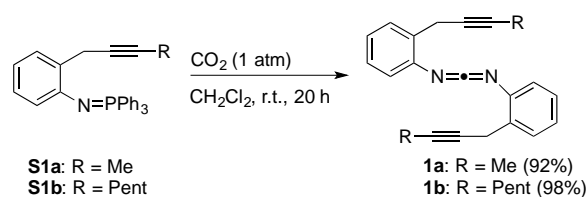

**Bis[2-(2-butyn-1-yl)phenyl]carbodiimide (1a).** A dichloromethane (40 mL) solution of iminophosphorane **S1a** (1.85 g, 4.6 mmol) was degassed, charged with  $\text{CO}_2$ , and stirred for 20 h at room temperature. The reaction mixture was evaporated, and the residue was purified by silica gel column chromatography (ethyl acetate/hexane = 1/10) to give carbodiimide **1a** (624 mg, 92%) as a colorless oil: IR (neat): 2915, 2298, 2144, 1589, 1488, 1172, 1087  $\text{cm}^{-1}$ ;  $^1\text{H}$  NMR (600 MHz,  $\text{CDCl}_3$ ,  $\delta$ ): 7.52 (d,  $J = 7.6$  Hz, 2H), 7.22–7.20 (m, 4H), 7.18–7.14 (m, 2H), 3.64 (q,  $J = 2.5$  Hz, 4H), 1.84 (t,  $J = 2.5$  Hz, 6H);  $^{13}\text{C}$  NMR (151 MHz,  $\text{CDCl}_3$ ,  $\delta$ ): 136.3 (C  $\times$  2), 133.6 (C), 131.7 (C  $\times$  2), 129.3 (CH  $\times$  2), 127.7 (CH  $\times$  2), 125.6 (CH  $\times$  2), 124.7 (CH  $\times$  2), 84.1 (C  $\times$  2), 76.1 (C  $\times$  2), 21.6 (CH<sub>2</sub>  $\times$  2), 13.7 (CH<sub>3</sub>  $\times$  2); HRMS (ESI) calcd for  $\text{C}_{21}\text{H}_{19}\text{N}_2$  [ $\text{M} + \text{H}$ ]<sup>+</sup>: 299.1543, found 299.1550.

**Bis[2-(2-octyn-1-yl)phenyl]carbodiimide (1b).** The title compound (160 mg, 98%) was synthesized from **S1b** (369 mg, 0.80 mmol) using the same procedure described above. Colorless oil: IR (neat): 2931, 2298, 2152, 1581, 1481, 1172, 1087  $\text{cm}^{-1}$ ;  $^1\text{H}$  NMR (300 MHz,  $\text{CDCl}_3$ ,  $\delta$ ): 7.55 (d,  $J = 7.2$  Hz, 2H), 7.22–7.12 (m, 6H), 3.66 (t,  $J = 2.3$  Hz, 4H), 2.21 (tt,  $J = 2.3, 7.1$  Hz, 4H), 1.58–1.47 (m, 4H), 1.43–1.25 (m, 8H), 0.90 (t,  $J = 7.0$  Hz, 6H);  $^{13}\text{C}$  NMR (75 MHz,  $\text{CDCl}_3$ ,  $\delta$ ): 136.3 (C  $\times$  2), 133.5 (C), 131.8 (C  $\times$  2), 129.2 (CH

<sup>S1</sup> T. Saito, N. Furukawa and T. Otani, *Org. Biomol. Chem.*, 2010, **8**, 1126–1132.

<sup>S2</sup> H. Tomioka, N. Nakane and J. Tatsugi, *Bull. Chem. Soc. Jpn.*, 2008, **81**, 1629–1637.

× 2), 127.6 (CH × 2), 125.6 (CH × 2), 124.6 (CH × 2), 83.2 (C × 2), 76.6 (C × 2), 31.1 (CH<sub>2</sub> × 2), 28.7 (CH<sub>2</sub> × 2), 22.2 (CH<sub>2</sub> × 2), 21.6 (CH<sub>2</sub> × 2), 18.8 (CH<sub>2</sub> × 2), 14.0 (CH<sub>3</sub> × 2); HRMS (ESI) calcd for C<sub>29</sub>H<sub>35</sub>N<sub>2</sub> [M + H]<sup>+</sup>: 411.2795, found 411.2794.

## 1.2.2 Synthesis of Carbodiimides 2

### Scheme S2. Synthesis of Carbodiimides 2

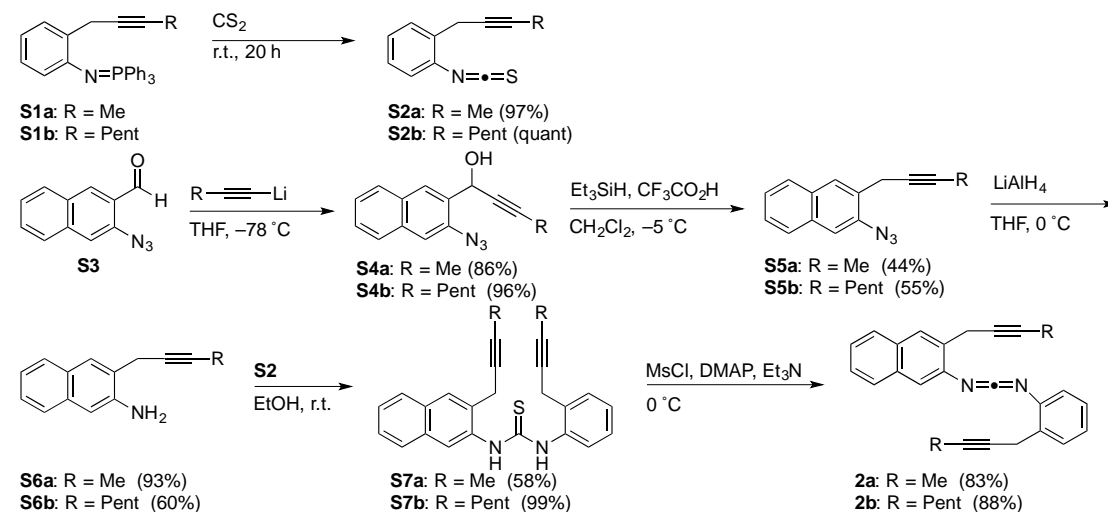

**2-(2-Butyn-1-yl)phenyl isothiocyanate (S2a).** Iminophosphorane **S1a** (810 mg, 2.00 mmol) was dissolved in carbon disulfide (5 mL) and the solution was stirred for 20 h. The reaction mixture was concentrated in vacuo, and the residue was purified by silica gel column chromatography (ethyl acetate/hexane = 1/10) to give isothiocyanate **S2a** (364 mg, 97%) as a colorless oil: IR (neat): 2915, 2090, 1589, 1481, 1419, 1280, 1095 cm<sup>-1</sup>; <sup>1</sup>H NMR (500 MHz, CDCl<sub>3</sub>, δ): 7.54–7.52 (m, 1H), 7.28–7.22 (m, 3H), 3.61 (q, *J* = 2.4 Hz, 2H), 1.87 (t, *J* = 2.4 Hz, 3H); <sup>13</sup>C NMR (126 MHz, CDCl<sub>3</sub>, δ): 139.1 (C), 133.9 (C), 129.7 (C), 129.3 (CH), 127.8 (CH), 127.5 (CH), 126.4 (CH), 79.1 (C), 74.6 (C), 22.1 (CH<sub>2</sub>), 3.6 (CH<sub>3</sub>); HRMS (ESI) calcd for C<sub>11</sub>H<sub>9</sub>NSNa [M + Na]<sup>+</sup>: 210.0348, found 210.0348.

**2-(2-Octyn-1-yl)phenyl isothiocyanate (S2b).** The title compound (2.23 g, quant) was obtained from **S1b** (4.14 g, 8.97 mmol) and carbon disulfide (20 mL) using the same procedure described above. Colorless oil: IR (neat): 2931, 2098, 1581, 1481, 1218, 1172, 1095 cm<sup>-1</sup>; <sup>1</sup>H NMR (500 MHz, CDCl<sub>3</sub>, δ): 7.53 (d, *J* = 7.1 Hz, 1H), 7.27–7.19 (m, 3H), 3.62 (t, *J* = 2.4 Hz, 2H), 2.22 (tt, *J* = 2.4, 7.2 Hz, 2H), 1.57–1.49 (m, 2H), 1.41–1.30 (m, 4H), 0.90 (t, *J* = 7.2 Hz, 3H); <sup>13</sup>C NMR (76 MHz, CDCl<sub>3</sub>, δ): 134.0 (C), 129.6 (C), 129.2 (CH), 127.7 (CH), 127.6 (C), 127.5 (CH), 126.3 (CH), 83.9 (C), 75.4 (C), 31.1 (CH<sub>2</sub>), 28.6 (CH<sub>2</sub>), 22.21 (CH<sub>2</sub>), 22.18 (CH<sub>2</sub>), 18.8 (CH<sub>2</sub>), 14.0 (CH<sub>3</sub>); HRMS (ESI) calcd for C<sub>15</sub>H<sub>17</sub>NSNa [M + Na]<sup>+</sup>: 266.0974, found 266.0978.

**3-Azido-α-(1-propyn-1-yl)-2-naphthalenemethanol (S4a).** To a THF (10 mL) solution of 1-bromo-1-propene (0.68 mL, 7.98 mmol) was added 1.66 M hexane solution of *n*-butyllithium (7.05 mL, 11.7 mmol) at –78 °C. The mixture was stirred for 2 h, and a THF (10 mL) solution of 3-azido-2-naphthalenecarboxaldehyde (**S3**) (1.05 g, 5.32 mmol) was added. The mixture was stirred for 20 min, and the reaction was quenched by addition of saturated aqueous ammonium chloride. The mixture was extracted with dichloromethane, washed with brine,

dried over anhydrous magnesium sulfate, and evaporated. The residue was purified by silica gel column chromatography (ethyl acetate/hexane = 1/10) to give alkynyl azide **S4a** (1.08 g, 86%) as a colorless solid: Mp 80.2–80.9 °C; IR (KBr) 3293, 2291, 2113, 1596, 863 cm<sup>-1</sup>; <sup>1</sup>H NMR (500 MHz, CDCl<sub>3</sub>, δ): 8.09 (s, 1H), 7.85 (d, *J* = 8.1 Hz, 1H), 7.76 (d, *J* = 8.0 Hz, 1H), 7.55 (s, 1H), 7.51 (dd, *J* = 7.0, 7.9 Hz, 1H), 7.45 (dd, *J* = 7.1, 7.9 Hz, 1H), 5.74–5.70 (m, 1H), 2.72 (d, *J* = 6.2 Hz, 1H), 1.95 (d, *J* = 2.0 Hz, 3H); <sup>13</sup>C NMR (126 MHz, CDCl<sub>3</sub>, δ): 135.7 (C), 133.6 (C), 131.3 (C), 130.8 (C), 128.2 (CH), 127.8 (CH), 127.2 (CH), 126.3 (CH), 125.8 (CH), 115.9 (CH), 83.5 (C), 78.1 (C), 61.4 (CH), 3.9 (CH<sub>3</sub>); HRMS (ESI) calcd for C<sub>14</sub>H<sub>11</sub>N<sub>3</sub>NaO [M + Na]<sup>+</sup>: 266.1264, found 266.1267.

**3-Azido-α-(1-heptyn-1-yl)-2-naphthalenemethanol (S4b).** To a THF (10 mL) solution of 1-heptyne (0.94 mL, 7.2 mmol) was added a 1.66 M hexane solution of *n*-butyllithium (4.34 mL, 7.2 mmol) at -78 °C. After being stirred for 1 h, the mixture was warmed to room temperature, and a THF (10 mL) solution of **S3** (1.18 g, 6.00 mmol) was added. The reaction was quenched by addition of saturated aqueous ammonium chloride. The mixture was extracted with dichloromethane, washed

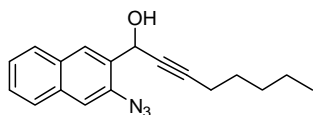

with brine, dried over anhydrous magnesium sulfate, and evaporated. The residue was purified by silica gel column chromatography (ethyl acetate/hexane = 1/10) to give alkynyl azide **S4b** (1.69 g, 96%) as a colorless solid: Mp 47.7–48.1 °C; IR (KBr): 3309, 2267, 2113, 1596, 863 cm<sup>-1</sup>; <sup>1</sup>H NMR (600 MHz, CDCl<sub>3</sub>, δ): 8.10 (s, 1H), 7.83 (d, *J* = 8.2 Hz, 1H), 7.75 (d, *J* = 8.2 Hz, 1H), 7.53 (s, 1H), 7.50 (dd, *J* = 7.2, 8.2 Hz, 1H), 7.44 (dd, *J* = 7.2, 7.7 Hz, 1H), 5.72 (dd, *J* = 2.0, 6.0 Hz, 1H), 2.77 (d, *J* = 6.1 Hz, 1H), 2.30 (td, *J* = 2.0, 7.2 Hz, 2H), 1.57 (tt, *J* = 7.5, 7.5 Hz, 2H), 1.44–1.38 (m, 2H), 1.37–1.30 (m, 2H), 0.91 (t, *J* = 7.2 Hz, 3H); <sup>13</sup>C NMR (151 MHz, CDCl<sub>3</sub>, δ): 135.7 (C), 133.5 (C), 131.4 (C), 130.8 (C), 128.2 (CH), 127.8 (CH), 127.2 (CH), 126.3 (CH), 125.8 (CH), 115.8 (CH), 88.1 (C), 78.8 (C), 61.4 (CH), 31.1 (CH<sub>2</sub>), 28.2 (CH<sub>2</sub>), 22.2 (CH<sub>2</sub>), 18.9 (CH<sub>2</sub>), 14.0 (CH<sub>3</sub>); HRMS (ESI) calcd for C<sub>18</sub>H<sub>19</sub>N<sub>3</sub>NaO [M + Na]<sup>+</sup>: 316.1420, found 316.1415.

**2-Azido-3-(2-butyn-1-yl)naphthalene (S5a).** To a dichloromethane (30 mL) solution of alcohol **S4a** (1.08 g, 4.57 mmol) and triethylsilane (1.46 mL, 9.14 mmol) was added trifluoroacetic acid (0.509 mL, 6.86 mmol) at -5 °C. After being stirred for 16 h at -5 °C, the reaction was quenched by addition of saturated aqueous sodium hydrogen carbonate. The mixture

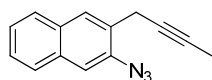

was extracted with dichloromethane, washed with brine, dried over anhydrous magnesium sulfate, and evaporated. The residue was purified by silica gel column chromatography (hexane) to give **S5a** (440 mg, 44%) as a colorless solid: Mp 82.0–82.4 °C; IR (KBr): 2206, 2113, 1596, 856 cm<sup>-1</sup>; <sup>1</sup>H NMR (600 MHz, CDCl<sub>3</sub>, δ): 7.96 (s, 1H), 7.82 (d, *J* = 8.1 Hz, 1H), 7.75 (d, *J* = 8.0 Hz, 1H), 7.51 (s, 1H), 7.46 (dd, *J* = 1.0, 6.9, 8.0 Hz, 1H), 7.43 (ddd, *J* = 1.0, 7.0, 8.2 Hz, 1H), 3.60 (q, *J* = 2.5 Hz, 2H), 1.92 (t, *J* = 2.5 Hz, 3H); <sup>13</sup>C NMR (151 MHz, CDCl<sub>3</sub>, δ): 136.6 (C), 132.9 (C), 131.1 (C), 128.4 (CH), 128.3 (C), 127.6 (CH), 126.4 (CH), 126.3 (CH), 125.5 (CH), 115.1 (CH), 78.9 (C), 75.7 (C), 21.0 (CH<sub>2</sub>), 3.7 (CH<sub>3</sub>); HRMS (ESI) calcd for C<sub>14</sub>H<sub>12</sub>N<sub>3</sub> [M + H]<sup>+</sup>: 221.0953, found 221.0950.

**2-Azido-3-(2-octyn-1-yl)naphthalene (S5b).** The title compound (0.88 g, 55%) was obtained from **S4b** (1.69 g, 5.76 mmol), triethylsilane (1.85 mL, 11.5 mmol), trifluoroacetic acid (0.86 mL, 11.5 mmol) and dichloromethane (30 mL) using the same procedure described above. Colorless solid: Mp 142.6–143.1 °C; IR (KBr): 2329, 2105, 1596, 863 cm<sup>-1</sup>; <sup>1</sup>H NMR (600 MHz, CDCl<sub>3</sub>, δ): 7.99 (s, 1H), 7.80

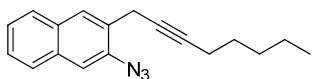

(d,  $J = 8.3$  Hz, 1H), 7.75 (d,  $J = 8.1$  Hz, 1H), 7.50 (s, 1H), 7.46 (ddd,  $J = 1.2, 7.3, 8.3$  Hz, 1H), 7.42 (ddd,  $J = 1.2, 7.3, 8.0$  Hz, 1H), 3.62 (s, 2H), 2.28 (tt,  $J = 2.4, 7.1$  Hz, 2H), 1.59 (tt,  $J = 7.1, 7.5$  Hz, 2H), 1.47–1.41 (m, 2H), 1.40–1.33 (m, 2H), 0.93 (t,  $J = 7.3$  Hz, 3H);  $^{13}\text{C}$  NMR (151 MHz,  $\text{CDCl}_3$ ,  $\delta$ ): 136.6 (C), 132.8 (C), 131.0 (C), 128.4 (C), 128.3 (CH), 127.6 (CH), 126.4 (CH), 126.3 (CH), 125.5 (CH), 115.0 (CH), 83.8 (C), 76.5 (C), 31.2 ( $\text{CH}_2$ ), 28.7 ( $\text{CH}_2$ ), 22.3 ( $\text{CH}_2$ ), 21.1 ( $\text{CH}_2$ ), 18.9 ( $\text{CH}_2$ ), 14.0 ( $\text{CH}_3$ ); HRMS (ESI) calcd for  $\text{C}_{18}\text{H}_{19}\text{N}_3\text{Na}$  [ $\text{M} + \text{Na}$ ] $^+$ : 300.1471, found 300.1470.

**3-(2-Butyn-1-yl)-2-naphthalenamine (S6a).** To a suspension of lithium aluminum hydride (LAH) (214 mg, 5.65 mmol) in THF (30 mL) was added a THF (20 mL) solution of **S5a** (500 mg, 2.26 mmol) at 0 °C. The mixture was stirred for 15 min and quenched by addition of aqueous THF (1:1) followed by 1 M aqueous HCl (5 mL) at 0 °C. The mixture was extracted with ethyl acetate, dried over anhydrous magnesium sulfate, and evaporated. The residue was purified by silica gel column chromatography (ethyl acetate/hexane = 1/4) to give **S6a** (408 mg, 93%) as a colorless solid: Mp 72.4–72.8 °C; IR (KBr): 3270, 2915, 2291, 1697, 1542, 1049, 879  $\text{cm}^{-1}$ ;  $^1\text{H}$  NMR (300 MHz,  $\text{CDCl}_3$ ,  $\delta$ ): 7.68 (d,  $J = 8.1$  Hz, 1H), 7.65 (s, 1H), 7.58 (d,  $J = 8.2$  Hz, 1H), 7.34 (ddd,  $J = 1.2, 6.8, 8.1$  Hz, 1H), 7.22 (ddd,  $J = 1.2, 6.8, 8.1$  Hz, 1H), 7.02 (s, 1H), 4.10 (br, 2H), 3.56 (q,  $J = 2.5$  Hz, 2H), 1.85 (t,  $J = 2.5$  Hz, 3H);  $^{13}\text{C}$  NMR (75 MHz,  $\text{CDCl}_3$ ,  $\delta$ ): 143.1 (C), 134.0 (C), 128.1 (C), 128.0 (CH), 127.3 (CH), 125.8 (CH), 125.3 (CH), 125.2 (C), 122.6 (CH), 109.9 (CH), 78.7 (C), 75.3 (C), 22.5 ( $\text{CH}_2$ ), 3.6 ( $\text{CH}_3$ ); HRMS (ESI) calcd for  $\text{C}_{14}\text{H}_{14}\text{N}$  [ $\text{M} + \text{H}$ ] $^+$ : 196.1121, found 196.1114.

**3-(2-Octyn-1-yl)-2-naphthalenamine (S6b).** The title compound (529 mg, 60%) was synthesized from **S5b** (972 mg, 3.50 mmol), lithium aluminum hydride (LAH) (332 mg, 8.76 mmol), and THF (50 mL) using the same procedure described above. Colorless solid: Mp 50.6–51.6 °C; IR (KBr): 3363, 2931, 1635, 1511, 1280, 1018, 871  $\text{cm}^{-1}$ ;  $^1\text{H}$  NMR (500 MHz,  $\text{CDCl}_3$ ,  $\delta$ ): 7.68 (d,  $J = 8.2$  Hz, 1H), 7.66 (s, 1H), 7.58 (d,  $J = 8.2$  Hz, 1H), 7.33 (ddd,  $J = 1.2, 7.4, 7.6$  Hz, 1H), 7.22 (ddd,  $J = 1.2, 7.4, 7.6$  Hz, 1H), 7.02 (s, 1H), 4.08 (br, 2H), 3.58 (t,  $J = 1.8$  Hz, 2H), 2.21 (tt,  $J = 2.4, 7.1$  Hz, 2H), 1.56–1.49 (m, 2H), 1.41–1.28 (m, 4H), 0.90 (t,  $J = 7.1$  Hz, 3H);  $^{13}\text{C}$  NMR (126 MHz,  $\text{CDCl}_3$ ,  $\delta$ ): 143.1 (C), 134.0 (C), 128.2 (C), 128.0 (CH), 127.4 (CH), 125.8 (CH), 125.3 (CH), 125.3 (C), 122.6 (CH), 109.8 (CH), 83.6 (C), 76.1 (C), 31.1 ( $\text{CH}_2$ ), 28.6 ( $\text{CH}_2$ ), 22.5 ( $\text{CH}_2$ ), 22.2 ( $\text{CH}_2$ ), 18.8 ( $\text{CH}_2$ ), 14.0 ( $\text{CH}_3$ ); HRMS (ESI) calcd for  $\text{C}_{18}\text{H}_{21}\text{NNa}$  [ $\text{M} + \text{Na}$ ] $^+$ : 274.1566, found 274.1579.

**N-[3-(2-Octyn-1-yl)-2-naphthaleny]-N'-[2-(2-octyn-1-yl)phenyl]thiourea (S7b).** A mixture of isothiocyanate **S2b** (2.23 g, 9.20 mmol) and **S6b** (2.31 g, 9.20 mmol) in ethanol (10 mL) was stirred for 20 h at room temperature and then evaporated. The residue was purified by silica gel column chromatography (ethyl acetate/hexane = 1/10) to give **S7b** (4.38 g, 99%) as a colorless solid: Mp 58.2–58.5 °C; IR (neat): 3301, 2931, 1596, 1457, 1087, 879  $\text{cm}^{-1}$ ;  $^1\text{H}$  NMR (500 MHz,  $\text{CDCl}_3$ ,  $\delta$ ): 8.13 (br, 2H), 7.93 (s, 2H), 7.79 (dd,  $J = 6.8, 7.0$  Hz, 2H), 7.56 (d,  $J = 7.5$  Hz, 1H), 7.48–7.41 (m, 3H), 7.33–7.23 (m, 2H), 3.74 (s, 2H), 3.56 (s, 2H), 2.14–2.04 (m, 2H), 1.80–1.60 (m, 2H), 1.48–1.40 (m, 2H), 1.37–1.10 (m, 10H), 0.89 (t,  $J = 6.9$  Hz, 3H), 0.82 (t,  $J = 7.0$  Hz, 3H);  $^{13}\text{C}$  NMR (126 MHz,  $\text{CDCl}_3$ ,  $\delta$ ): 181.0 (C), 135.5 (C), 134.5 (C), 133.4 (C), 132.7 (C), 132.7 (C), 132.5 (C), 129.7 (CH), 128.5 (CH), 128.1 (CH), 128.0 (CH), 127.64 (CH), 127.56 (CH), 127.3 (CH), 126.7 (CH), 126.6 (CH), 126.2 (CH), 84.0 (C), 83.5 (C), 76.1 (C), 75.9 (C), 31.1 ( $\text{CH}_2$ ), 30.9 ( $\text{CH}_2$ ), 28.5 ( $\text{CH}_2$ ), 28.3 ( $\text{CH}_2$ ), 22.5 ( $\text{CH}_2$ ), 22.1 ( $\text{CH}_2$ ), 22.1 ( $\text{CH}_2$ ), 22.0 ( $\text{CH}_2$ ),

18.7 (CH<sub>2</sub>), 18.3 (CH<sub>2</sub>), 13.9 (CH<sub>3</sub>), 13.8 (CH<sub>3</sub>); HRMS (ESI) calcd for C<sub>33</sub>H<sub>38</sub>N<sub>2</sub>SNa [M + Na]<sup>+</sup>: 517.2648, found 517.2648.

*N*-[3-(2-Butyn-1-yl)-2-naphthalenyl]-*N'*-[2-(2-butyn-1-yl)phenyl]thiourea (**S7a**). The title compound

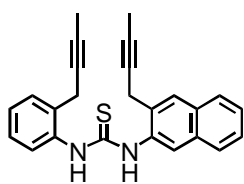

(261.7 mg, 58%) was obtained from **S2a** (221 mg, 1.18 mmol), **S6a** (230 mg, 1.18 mmol), and ethanol (10 mL) using the same procedure described above. Colorless solid: Mp 132.8–133.3 °C; IR (KBr): 3332, 3147, 2954, 1527, 1488, 1257, 1203, 755 cm<sup>-1</sup>; <sup>1</sup>H NMR (500 MHz, CDCl<sub>3</sub>, δ): 8.11 (br, 1H), 8.01 (br, 1H), 7.97 (s, 1H), 7.90 (br, 1H), 7.81 (dd, *J* = 6.0, 7.4 Hz, 1H), 7.81 (d, *J* = 7.4 Hz, 1H), 7.58 (d, *J* = 7.4 Hz, 1H), 7.49–7.44 (m, 2H), 7.40 (br, 1H), 7.32 (dd, *J* = 7.4, 7.8 Hz, 1H), 7.26 (dd, *J* = 7.4, 7.8 Hz, 1H), 3.70 (br, 2H), 3.51 (br, 2H), 1.72 (br, 3H), 1.34 (br, 3H); <sup>13</sup>C NMR (126 MHz, CDCl<sub>3</sub>, δ): 181.0 (C), 135.5 (br, C), 134.3 (br, C), 133.4 (br, C), 132.7 (C), 132.6 (C), 129.8 (CH), 128.6 (CH), 128.2 (CH), 128.0 (CH), 127.8 (CH), 127.6 (CH), 127.4 (CH), 126.9 (CH), 126.7 (CH), 126.3 (CH), 79.1 (C), 78.7 (C), 75.4 (C), 75.2 (C), 22.5 (CH<sub>2</sub>), 22.2 (CH<sub>2</sub>), 3.6 (CH<sub>3</sub>), 3.0 (CH<sub>3</sub>) (one quaternary carbon was not observed); HRMS (ESI) calcd for C<sub>25</sub>H<sub>22</sub>N<sub>2</sub>SNa [M + Na]<sup>+</sup>: 405.1393, found 405.1393.

3-(2-Octyn-1-yl)-*N*-[[2-(2-octyn-1-yl)phenyl]carbonimidoyl]-2-naphthalenamine (**2b**). Thiourea **S7b** (4.38 g, 8.86 mmol) was dissolved in dichloromethane (10 mL). Triethylamine (3.83 mL, 27.5 mmol),

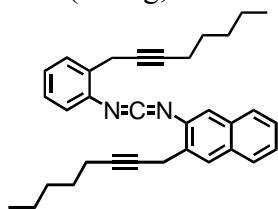

*N,N*-dimethyl-4-aminopyridine (DMAP) (55 mg, 0.46 mmol), and methanesulfonyl chloride (1.42 mL, 18.3 mmol) were added in this order at 0 °C. The mixture was stirred for 10 min and concentrated in vacuo. The residue was purified by silica gel column chromatography (ethyl acetate/hexane = 1/10) to give **2b** (3.57 g, 88%) as a colorless oil: IR (neat): 2931, 2144, 1581, 1496, 1172, 1087, 871 cm<sup>-1</sup>; <sup>1</sup>H NMR (500 MHz, CDCl<sub>3</sub>, δ): 7.94 (s, 1H), 7.72 (dd, *J* = 2.8, 6.9 Hz, 1H), 7.61 (dd, *J* = 2.8, 6.8 Hz, 1H), 7.54 (s, 2H), 7.36–7.32 (m, 2H), 7.21–7.09 (m, 3H), 3.77 (s, 2H), 3.69 (s, 2H), 2.26–2.21 (m, 2H), 2.19–2.14 (m, 2H), 1.56–1.45 (m, 4H), 1.43–1.23 (m, 8H), 0.90 (t, *J* = 7.3 Hz, 3H), 0.87 (t, *J* = 7.2 Hz, 3H); <sup>13</sup>C NMR (126 MHz, CDCl<sub>3</sub>, δ): 136.1 (C), 134.8 (C), 132.8 (C), 131.8 (C), 131.7 (C), 131.3 (C), 130.8 (C), 129.1 (CH), 127.7 (CH), 127.5 (CH), 127.3 (CH), 126.4 (CH), 125.9 (CH), 125.5 (CH), 125.4 (CH), 124.5 (CH), 121.8 (CH), 83.6 (C), 83.1 (C), 76.68 (C), 76.67 (C), 31.1 (CH<sub>2</sub>), 31.0 (CH<sub>2</sub>), 28.7 (CH<sub>2</sub>), 28.6 (CH<sub>2</sub>), 22.2 (CH<sub>2</sub>), 22.12 (CH<sub>2</sub>), 22.11 (CH<sub>2</sub>), 21.6 (CH<sub>2</sub>), 18.81 (CH<sub>2</sub>), 18.75 (CH<sub>2</sub>), 13.94 (CH<sub>3</sub>), 13.89 (CH<sub>3</sub>); HRMS (ESI) calcd for C<sub>33</sub>H<sub>37</sub>N<sub>2</sub> [M + H]<sup>+</sup>: 461.2951, found 461.2951.

3-(2-Butyn-1-yl)-*N*-[[2-(2-butyn-1-yl)phenyl]carbonimidoyl]-2-naphthalenamine (**2a**). The title

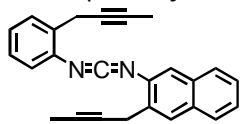

compound (199 mg, 83%) was obtained from **S7a** (262 mg, 0.68 mmol), triethylamine (0.29 mL, 2.05 mmol), DMAP (4.2 mg, 0.03 mmol), methanesulfonyl chloride (0.11 mL, 1.37 mmol), and dichloromethane (10 mL) using the same procedure described

above. Colorless solid: Mp 90.9–91.4 °C; IR (KBr): 2908, 2152, 2129, 1573, 1450, 1226, 748 cm<sup>-1</sup>; <sup>1</sup>H NMR (300 MHz, CDCl<sub>3</sub>, δ): 7.95 (s, 1H), 7.79 (dd, *J* = 2.3, 7.3 Hz, 1H), 7.70 (dd, *J* = 2.3, 7.3 Hz, 1H), 7.63 (s, 1H), 7.52 (dd, *J* = 2.2, 7.0 Hz, 1H), 7.41 (m, 2H), 7.24 (m, 3H), 3.77 (q, *J* = 2.5 Hz, 2H), 3.67 (q, *J* = 2.5 Hz, 2H), 1.88 (t, *J* = 2.5 Hz, 3H), 1.82 (t, *J* = 2.5 Hz, 3H); <sup>13</sup>C NMR (75 MHz, CDCl<sub>3</sub>, δ): 136.2 (C), 134.9 (C), 133.1 (C), 132.9 (C), 131.8 (C), 131.5 (C), 130.8 (C), 129.4 (CH), 127.9 (CH), 127.7 (CH), 127.5 (CH), 126.5 (CH), 126.1 (CH), 125.7 (CH), 125.6 (CH), 124.8 (CH), 122.1 (CH), 78.9 (C), 78.3 (C), 76.1 (C), 76.0

(C), 22.2 (CH<sub>2</sub>), 21.7 (CH<sub>2</sub>), 3.7 (CH<sub>3</sub>), 3.6 (CH<sub>3</sub>); HRMS (ESI) calcd for C<sub>25</sub>H<sub>20</sub>N<sub>2</sub>Na [M + Na]<sup>+</sup>: 371.1519, found 371.1516.

### 1.2.3 Synthesis of Carbodiimides 3

#### Scheme S3. Synthesis of Carbodiimides 3a

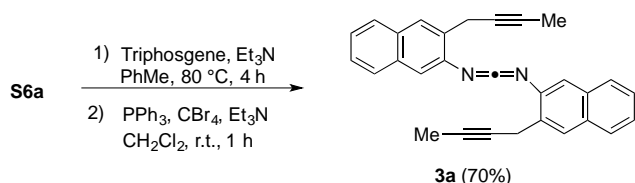

**Bis[3-(2-butyn-1-yl)-2-naphthalenyl]carbodiimide (3a).** A mixture of **S6a** (68 mg, 0.35 mmol), triethylamine (0.11 mL, 0.77 mmol), triphosgene (17 mg, 0.056 mmol), and toluene (3 mL) was heated at 80 °C for 4 h. The mixture was cooled to room temperature and then volatiles were removed under reduced pressure. To the residue were added THF (5 mL), triphenylphosphine (118 mg, 0.46 mmol), and triethylamine (0.10 mL, 0.75 mmol). The mixture was cooled to 0 °C, and carbon tetrabromide (179 mg, 0.54 mmol) was added. After being stirred for 1 h, the mixture was condensed under reduced pressure. The residue was purified by silica gel column chromatography (ethyl acetate/hexane = 1/10) to give **3a** (98 mg, 70%) as a colorless solid: Mp 157.2–157.7 °C; IR (neat): 2375, 2144, 1581, 871 cm<sup>-1</sup>; <sup>1</sup>H NMR (500 MHz, CDCl<sub>3</sub>, δ): 7.98 (s, 2H), 7.84–7.81 (m, 2H), 7.75–7.72 (m, 2H), 7.70 (s, 2H), 7.46–7.41 (m, 4H), 3.82 (q, *J* = 2.5 Hz, 4H), 1.88 (t, *J* = 2.5 Hz, 6H); <sup>13</sup>C NMR (126 MHz, CDCl<sub>3</sub>, δ): 141.1 (C), 134.8 (C × 2), 133.0 (C × 2), 131.5 (C × 2), 130.9 (C × 2), 128.0 (CH × 2), 127.5 (CH × 2), 126.6 (CH × 2), 126.2 (CH × 2), 125.7 (CH × 2), 122.3 (CH × 2), 78.9 (C × 2), 76.0 (C × 2), 22.3 (CH<sub>2</sub> × 2), 3.7 (CH<sub>3</sub> × 2); HRMS (ESI) calcd for C<sub>29</sub>H<sub>23</sub>N<sub>2</sub> [M + H]<sup>+</sup>: 399.1856, found 399.1865.

#### Scheme S4. Synthesis of Carbodiimides 3b

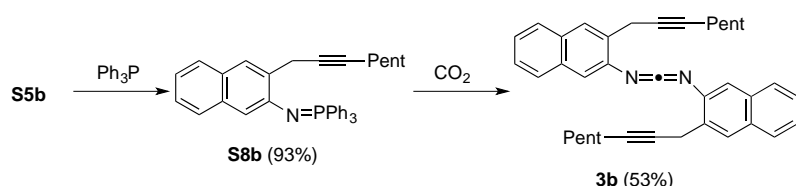

**3-(2-Octyn-1-yl)-N-(triphenylphosphoranylidene)-2-naphthalenamine (S8b).** Triphenylphosphine (912 mg, 3.48 mmol) was added to a solution of alkynyl azide **S5b** (877 mg, 3.16 mmol) in dichloromethane (20 mL) at room temperature. After being stirred for 10 h, the mixture was concentrated under reduced pressure. The residue was purified by silica gel column chromatography (ethyl acetate/hexane = 1/4) to give iminophosphorane **S8b** (1.53 g, 93%) as a colorless solid: Mp 129.5–130.4 °C; IR (KBr): 1589, 1450, 825 cm<sup>-1</sup>; <sup>1</sup>H NMR (600 MHz, CDCl<sub>3</sub>, δ): 7.95 (s, 1H), 7.82–7.78 (m, 6H), 7.66 (d, *J* = 8.0 Hz, 1H), 7.51 (dd, *J* = 7.4, 7.4 Hz, 3H), 7.44 (ddd, *J* = 2.7, 7.4, 7.7 Hz, 6H), 7.21 (d, *J* = 8.1 Hz, 1H), 7.15 (dd, *J* = 6.8, 8.0 Hz, 1H), 7.09 (dd, *J* = 6.8, 7.9 Hz, 1H), 6.66 (s, 1H), 4.03 (s, 2H), 2.30 (tt, *J* = 2.4, 7.1 Hz, 2H), 1.60–1.55 (m, 2H), 1.47–1.42 (m, 2H), 1.38–1.31 (m, 2H), 0.90 (t, *J* = 7.4 Hz, 3H); <sup>13</sup>C NMR (151 MHz, CDCl<sub>3</sub>, δ): 147.8 (C), 134.4 (C, d, *J* = 22.5 Hz), 133.9 (C), 132.6 (CH × 6, d, *J* = 9.6 Hz), 131.7 (CH × 3, d, *J* = 2.7 Hz), 131.1 (C × 3, d, *J* = 99.6 Hz), 128.6 (CH × 6, d, *J* = 11.8 Hz), 127.6 (C), 127.1 (CH), 126.2 (CH), 125.0 (CH),

124.5 (CH), 121.4 (CH), 114.0 (CH, d,  $J = 9.9$  Hz), 82.9 (C), 79.1 (C), 31.2 (CH<sub>2</sub>), 29.0 (CH<sub>2</sub>), 22.9 (CH<sub>2</sub>), 22.3 (CH<sub>2</sub>), 19.0 (CH<sub>2</sub>), 14.0 (CH<sub>3</sub>); HRMS (ESI) calcd for C<sub>36</sub>H<sub>35</sub>NP [M + H]<sup>+</sup>: 512.2502, found 512.2511.

**Bis[3-(2-octyn-1-yl)-2-naphthalenyl]carbodiimide (3b).** A dichloromethane (10 mL) solution of iminophosphorane **S8b** (1.53 g, 3.0 mmol) was degassed, charged with carbon dioxide, and stirred for 20 h at room temperature. The reaction mixture was evaporated, and the residue was purified by silica gel column chromatography (dichloromethane/hexane = 1/2) to give carbodiimide **3b** (405 mg, 53%) as a colorless oil: IR (neat): 2931, 2244, 1573, 1295, 863 cm<sup>-1</sup>; <sup>1</sup>H NMR (300 MHz, CDCl<sub>3</sub>, δ) 8.01 (s, 2H), 7.83–7.79 (m, 2H), 7.75–7.71 (m, 2H), 7.69 (s, 2H), 7.46–7.41 (m, 4H), 3.84 (q,  $J = 2.5$  Hz, 4H), 2.25 (tt,  $J = 2.4, 7.1$  Hz, 4H), 1.61–1.50 (m, 4H), 1.46–1.28 (m, 8H), 0.90 (t,  $J = 7.2$  Hz, 6H); <sup>13</sup>C NMR (75 MHz, CDCl<sub>3</sub>, δ) 134.8 (C × 2), 132.9 (C × 2), 132.6 (C), 131.5 (C × 2), 131.0 (C × 2), 128.0 (CH × 2), 127.5 (CH × 2), 126.6 (CH × 2), 126.2 (CH × 2), 125.6 (CH × 2), 122.3 (CH × 2), 83.9 (C × 2), 76.7 (C × 2), 31.2 (CH<sub>2</sub> × 2), 28.7 (CH<sub>2</sub> × 2), 22.3 (CH<sub>2</sub> × 2), 22.2 (CH<sub>2</sub> × 2), 18.9 (CH<sub>2</sub> × 2), 14.0 (CH<sub>3</sub> × 2); HRMS (ESI) calcd for C<sub>37</sub>H<sub>39</sub>N<sub>2</sub> [M + H]<sup>+</sup>: 511.3108, found 511.3104.

### 1.3 Synthesis of L-Shaped Molecules

#### 1.3.1 Synthesis of 4

**6,7-Dimethylbenzo[g]indolo[1,2-a][1,8]naphthyridine (4a).** To a heated toluene (2 mL) solution of Wilkinson catalyst (Rh(PPh<sub>3</sub>)<sub>3</sub>Cl) (23 mg, 0.025 mmol) was added a toluene (3 mL) solution of **1a** (75 mg, 0.25 mmol) at 120 °C. After being stirred for 20 min, the mixture was cooled to room temperature. To the mixture was added manganese(IV) oxide (65 mg, 0.75 mmol). After being stirred for 6 h, the suspension was filtered through Celite and the filtrate was evaporated. The residue was purified by silica gel column chromatography (chloroform/hexane = 1/2) to give **4a** (67 mg, 90%) as a yellow solid. Mp 221.0–221.7 °C; IR (KBr): 3046, 2923, 2854, 1596, 1542, 1457, 1396 cm<sup>-1</sup>; <sup>1</sup>H NMR (600 MHz, CDCl<sub>3</sub>, δ) 9.71 (d,  $J = 8.4$  Hz, 1H), 8.33 (s, 1H), 8.20 (d,  $J = 8.4$  Hz, 1H), 7.88 (d,  $J = 7.9$  Hz, 1H), 7.78 (d,  $J = 7.9$  Hz, 1H), 7.74 (ddd,  $J = 1.3, 6.8, 8.3$  Hz, 1H), 7.52–7.48 (m, 2H), 7.39 (ddd,  $J = 1.0, 7.2, 7.8$  Hz, 1H), 6.78 (s, 1H), 2.49 (s, 3H), 2.44 (s, 3H); <sup>13</sup>C NMR (151 MHz, CDCl<sub>3</sub>, δ): 147.0 (C), 145.0 (C), 137.7 (C), 134.7 (C), 131.1 (CH), 129.8 (C), 129.5 (CH), 127.7 (CH × 2), 125.4 (C), 125.3 (C), 124.8 (CH), 124.5 (C), 123.1 (CH), 122.7 (CH), 121.0 (C), 120.3 (CH), 118.0 (CH), 99.0 (CH), 15.1 (CH<sub>3</sub>), 14.0 (CH<sub>3</sub>); HRMS (ESI) calcd for C<sub>21</sub>H<sub>17</sub>N<sub>2</sub> [M + H]<sup>+</sup>: 297.1386, found 297.1380; Anal. Calcd for C<sub>21</sub>H<sub>16</sub>N<sub>2</sub>: C, 85.11; H, 5.44; N, 9.34. Found: C, 84.93; H, 5.44; N, 9.34.

**6,7-Dipentylbenzo[g]indolo[1,2-a][1,8]naphthyridine (4b).** The title compound (142 mg, 93%) was obtained from **1b** (155 mg, 0.38 mmol), Rh(PPh<sub>3</sub>)<sub>3</sub>Cl (35 mg, 0.038 mmol), and toluene (2 mL + 3 mL) using the same procedure described above. Yellow solid: Mp 110.5–110.9 °C; IR (KBr): 3054, 2923, 2854, 1589, 1535, 1457, 1396 cm<sup>-1</sup>; <sup>1</sup>H NMR (500 MHz, CDCl<sub>3</sub>, δ): 9.73 (d,  $J = 8.4$  Hz, 1H), 8.33 (s, 1H), 8.19 (d,  $J = 8.4$  Hz, 1H), 7.89 (d,  $J = 8.1$  Hz, 1H), 7.78 (d,  $J = 7.8$  Hz, 1H), 7.72 (ddd,  $J = 1.5, 7.0, 8.3$  Hz, 1H), 7.51–7.46 (m, 2H), 7.39 (ddd,  $J = 1.0, 7.1, 7.8$  Hz, 1H), 6.81 (s, 1H), 2.92 (dd,  $J = 6.6, 9.7$  Hz, 2H), 2.84 (dd,  $J = 6.6, 9.6$  Hz, 2H), 1.78–1.66 (m, 4H), 1.57–1.50 (m, 4H), 1.48–1.40 (m, 4H), 0.97 (t,  $J = 7.3$  Hz, 3H), 0.96 (t,  $J = 7.3$  Hz, 3H); <sup>13</sup>C NMR (126 MHz, CDCl<sub>3</sub>, δ): 147.4 (C), 145.6 (C), 137.1 (C), 134.6 (C), 131.2 (CH), 130.2 (C), 129.8 (C), 129.5 (CH), 129.0 (C), 127.7 (CH × 2), 125.4 (C), 124.7 (CH), 122.9 (CH), 122.7 (CH),



121.5 (C), 120.1 (CH), 118.1 (CH), 98.9 (CH), 32.4 (CH<sub>2</sub>), 32.3 (CH<sub>2</sub>), 29.7 (CH<sub>2</sub>), 29.6 (CH<sub>2</sub>), 29.4 (CH<sub>2</sub>), 27.7 (CH<sub>2</sub>), 22.6 (CH<sub>2</sub>), 22.5 (CH<sub>2</sub>), 14.1 (CH<sub>3</sub> × 2); HRMS (ESI) calcd for C<sub>29</sub>H<sub>33</sub>N<sub>2</sub> [M + H]<sup>+</sup>: 409.2638, found 409.2631; Anal. Calcd for C<sub>29</sub>H<sub>32</sub>N<sub>2</sub>: C, 85.25; H, 7.89; N, 6.86. Found: C, 85.14; H, 8.10; N, 6.77.

### 1.3.2 Synthesis of **5** and **6**

**Synthesis of 5a and 6a.** To a heated toluene (2 mL) solution of Rh(PPh<sub>3</sub>)<sub>3</sub>Cl (17 mg, 0.018 mmol) was added dropwise a toluene (3 mL) solution of carbodiimide **2a** (60.9 mg, 0.175 mmol) at 120 °C. The mixture was heated for 20 min and cooled to room temperature. Manganese(IV) oxide (65 mg, 0.75 mmol) was added and the mixture was stirred for 6 h. The suspension was filtrated through Celite and the filtrate was evaporated. The residue was purified by silica gel column chromatography (chloroform/hexane = 1/2) to give a mixture of **5a** and **6a** (31.9 mg, 52%). The ratio of **5a** to **6a** was determined as 51:49 from the integration of <sup>1</sup>H NMR signals. Crystallization of the mixture from toluene at 50 °C afforded almost pure **6a**, which was again recrystallized from toluene to give analytically and spectroscopically pure **6a** as red crystals. The combined filtrate was evaporated and the residue was dissolved in toluene by heating and diluted with ethanol. The resulting fine crystals which contain mainly **6a** was filtered off and the filtrate was evaporated. Recrystallization of the residue from toluene/ethanol at 50 °C yielded **5a** as cubic crystals together with a small amount of needles. Manual separation of the cubic crystals provided analytically and spectroscopically pure **5a** as brownish red crystals.

**6,7-Dimethylindolo[1,2-a]naphtho[2,3-g][1,8]naphthyridine (5a).** Brownish red solid: Mp 217.8–218.6 °C (dec); IR (KBr): 3046, 2923, 2360, 2337, 1542, 1457, 1403, 1349, 894, 779, 740 cm<sup>-1</sup>; <sup>1</sup>H NMR (300 MHz, CDCl<sub>3</sub>, δ): 9.66 (d, *J* = 8.4 Hz, 1H), 8.54 (s, 1H), 8.10 (s, 1H), 8.05 (s, 1H), 8.02 (d, *J* = 8.8 Hz, 1H), 7.88 (d, *J* = 8.4 Hz, 1H), 7.71 (d, *J* = 7.6 Hz, 1H), 7.52 (m, 4H), 6.59 (s, 1H), 2.23 (s, 3H), 2.17 (s, 3H). <sup>13</sup>C NMR (151 MHz, CDCl<sub>3</sub>, δ): 147.2 (C), 142.2 (C), 137.5 (C), 135.2 (C), 134.2 (C), 130.8 (C), 130.7 (CH), 129.9 (C), 128.1 (CH), 128.0 (CH), 126.4 (CH), 126.0 (CH), 125.0 (C), 124.9 (CH), 124.7 (C), 124.6 (C), 124.2 (CH), 123.4 (CH), 122.8 (CH), 121.7 (C), 120.3 (CH), 118.1 (CH), 100.2 (CH), 14.90 (CH<sub>3</sub>), 13.8 (CH<sub>3</sub>); HRMS (ESI) calcd for C<sub>25</sub>H<sub>19</sub>N<sub>2</sub> [M + H]<sup>+</sup>: 347.1543, found 347.1543; Anal. Calcd for C<sub>25</sub>H<sub>18</sub>N<sub>2</sub>: C, 86.68; H, 5.24; N, 8.09. Found: C, 86.78; H, 5.31; N, 7.88.

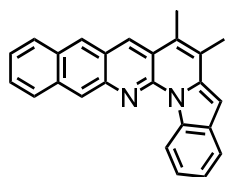

**7,8-Dimethylbenzo[g]benzo[f']indolo[1,2-a][1,8]naphthyridine (6a).** Brownish red solid: Mp 268.5–269.0 °C (dec); IR (KBr): 3433, 3047, 2916, 2360, 2337, 1597, 1543, 1442, 1396, 872, 741 cm<sup>-1</sup>; <sup>1</sup>H NMR (600 MHz, CDCl<sub>3</sub>, δ): 10.20 (s, 1H), 8.32 (s, 1H), 8.29 (d, *J* = 8.3 Hz, 1H), 8.24 (1H, *J* = 7.9 Hz, 1H), 8.22 (s, 1H), 8.03 (d, *J* = 7.9 Hz, 1H), 7.89 (d, *J* = 7.9 Hz, 1H), 7.79 (dd, *J* = 7.9, 8.3 Hz, 1H), 7.50 (m, 3H), 6.87 (s, 1H), 2.53 (s, 3H), 2.48 (s, 3H); <sup>13</sup>C NMR (151 MHz, CDCl<sub>3</sub>, δ): 147.4 (C), 146.0 (C), 140.8 (C), 134.8 (C), 131.0 (C), 130.9 (CH), 130.6 (C), 130.3 (C), 129.7 (CH), 129.1 (CH), 127.8 (CH), 127.7 (CH), 127.6 (CH), 126.7 (C), 125.4 (C), 125.2 (C), 124.7 (CH), 124.0 (CH), 123.8 (CH), 121.1 (C), 117.4 (CH), 114.9 (C), 98.7 (CH), 15.1 (CH<sub>3</sub>), 14.2 (CH<sub>3</sub>); HRMS-ESI (*m/z*): [M + H]<sup>+</sup>: calcd for C<sub>25</sub>H<sub>19</sub>N<sub>2</sub>, 347.1543; found, 347.1540; Anal. Calcd for C<sub>25</sub>H<sub>18</sub>N<sub>2</sub>: C, 86.68; H, 5.24; N, 8.09. Found: C, 86.04; H, 5.31; N, 7.96.

**Synthesis of 5b and 6b.** A 53:47 mixture of **5b** and **6b** (48.6 mg, 86%) was obtained from **2b** (56.8 mg, 0.123 mmol), Rh(PPh<sub>3</sub>)<sub>3</sub>Cl (11.4 mg, 0.012 mmol), and toluene (1 mL + 2 mL) using the same procedure described above.

**6,7-Dipentylindolo[1,2-a]naphtho[2,3-g][1,8]naphthyridine (5b).** Brownish red solid: Mp 126.3–

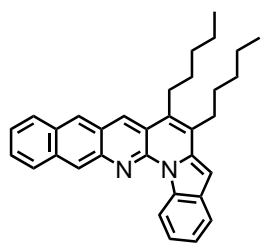

126.9 °C; <sup>1</sup>H NMR (600 MHz, CDCl<sub>3</sub>, δ): 10.20 (s, 1H), 8.29 (s, 1H), 8.28 (d, *J* = 8.2 Hz, 1H), 8.23 (dd, *J* = 1.1, 7.7 Hz, 1H), 8.20 (s, 1H), 8.02 (d, *J* = 7.7 Hz, 1H), 7.89 (dd, *J* = 0.9, 8.0 Hz, 1H), 7.77 (ddd, *J* = 1.4, 6.8, 8.3 Hz, 1H), 7.51–7.45 (m, 3H), 6.86 (s, 1H), 2.92 (dd, *J* = 6.6, 10.6 Hz, 2H), 2.84 (dd, *J* = 6.5, 10.5 Hz, 2H), 1.80–1.74 (m, 2H), 1.73–1.68 (m, 2H), 1.59–1.51 (m, 4H), 1.49–1.42 (m, 4H), 0.98 (t, *J* = 7.3 Hz, 3H), 0.97 (t, *J* = 7.3 Hz, 3H); <sup>13</sup>C NMR (151 MHz, CDCl<sub>3</sub>, δ): 147.8 (C), 145.9 (C), 140.3 (C), 134.7 (C), 131.1 (C), 131.0 (CH), 130.9 (C), 130.6 (C), 130.3 (C), 130.0 (C), 129.7 (CH), 129.1 (CH), 127.8 (CH), 127.6 (CH), 127.5 (CH), 125.4 (C), 124.6 (CH), 124.0 (CH), 123.7 (CH), 120.1 (C), 117.3 (CH), 115.0 (CH), 98.6 (CH), 32.42 (CH<sub>2</sub>), 32.36 (CH<sub>2</sub>), 29.6 (CH<sub>2</sub>), 29.5 (CH<sub>2</sub>), 29.4 (CH<sub>2</sub>), 27.8 (CH<sub>2</sub>), 22.59 (CH<sub>2</sub>), 22.57 (CH<sub>2</sub>), 14.12 (CH<sub>3</sub>), 14.10 (CH<sub>3</sub>); HRMS (ESI) calcd for C<sub>33</sub>H<sub>35</sub>N<sub>2</sub> [M + H]<sup>+</sup>: 459.2795, found 459.2796; Anal. Calcd for C<sub>33</sub>H<sub>34</sub>N<sub>2</sub>: C, 86.42; H, 7.47; N, 6.11. Found: C, 86.31; H, 7.53; N, 6.02.

**7,8-Dipentylbenzo[*g*]benzo[*f'*]indolo[1,2-*a*][1,8]naphthyridine (6b).** Brownish red solid: Mp 174.1–

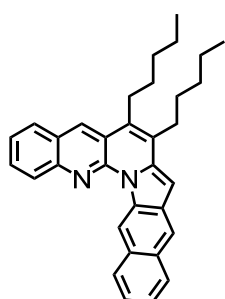

175.9 °C; <sup>1</sup>H NMR (600 MHz, CDCl<sub>3</sub>, δ): 9.78 (d, *J* = 8.2 Hz, 1H), 8.70 (s, 1H), 8.43 (s, 1H), 8.42 (s, 1H), 8.09 (d, *J* = 8.3 Hz, 1H), 8.02 (d, *J* = 8.3 Hz, 1H), 7.76 (d, *J* = 7.7 Hz, 1H), 7.54–7.50 (m, 2H), 7.47 (ddd, *J* = 1.0, 6.8, 8.3 Hz, 1H), 7.39 (ddd, *J* = 0.9, 6.8, 7.7 Hz, 1H), 6.81 (s, 1H), 2.92 (dd, *J* = 6.4, 10.5 Hz, 2H), 2.82 (dd, *J* = 6.5, 10.5 Hz, 2H), 1.77–1.70 (m, 4H), 1.60–1.41 (m, 8H), 0.99 (t, *J* = 7.2 Hz, 3H), 0.96 (t, *J* = 7.2 Hz, 3H); <sup>13</sup>C NMR (151 MHz, CDCl<sub>3</sub>, δ): 147.8 (C), 142.3 (C), 137.1 (C), 135.2 (C), 134.3 (C), 131.1 (CH), 130.9 (C), 130.1 (C), 130.0 (C), 129.2 (C), 128.1 (CH), 128.0 (CH), 126.5 (CH), 126.1 (CH), 125.0 (CH), 124.8 (C), 124.4 (CH), 123.4 (CH), 122.9 (CH), 121.1 (C), 120.3 (CH), 118.2 (CH), 100.4 (CH), 32.401 (CH<sub>2</sub>), 32.400 (CH<sub>2</sub>), 29.64 (CH<sub>2</sub>), 29.57 (CH<sub>2</sub>), 29.5 (CH<sub>2</sub>), 27.7 (CH<sub>2</sub>), 22.599 (CH<sub>2</sub>), 22.597 (CH<sub>2</sub>), 14.13 (CH<sub>3</sub>), 14.11 (CH<sub>3</sub>); HRMS (ESI) calcd for C<sub>33</sub>H<sub>35</sub>N<sub>2</sub> [M + H]<sup>+</sup>: 459.2795, found 459.2793; Anal. Calcd for C<sub>33</sub>H<sub>34</sub>N<sub>2</sub>: C, 86.42; H, 7.47; N, 6.11. Found: C, 86.19; H, 7.50; N, 5.99.

### 1.3.3 Synthesis of 7

**7,8-Dimethylbenzo[*f'*]indolo[1,2-*a*]naphtho[2,3-*g*][1,8]naphthyridine (7a).** To a heated toluene (1

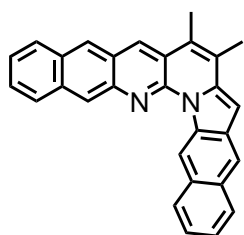

mL) solution of RhCl(PPh<sub>3</sub>)<sub>3</sub> (14.1 mg, 0.015 mmol) was slowly added toluene (3 mL) solution of carbodiimide **3a** (60.8 mg, 0.15 mmol) at 120 °C. After being stirred for 20 min at 120 °C, the mixture was cooled to room temperature, and manganese(IV) oxide was added. After being stirred for 38 h, the mixture was extracted with chloroform (100 mL), and the resulting insoluble material was removed by passing through Celite. The filtrate was condensed to ca. 1/5 volume, and the resulting solid was collected by filtration and washed with ethyl acetate to give red solid of **7a** (30 mg, 50%) as a first crop. The filtrate was evaporated and the residue was purified by silica gel column chromatography (chloroform/hexane = 1/2) to give a second crop of **7a** (9.1 mg, 15%). Mp 296.1 °C (dec); IR (KBr): 3042, 2923, 2854, 1596, 1542, 1457, 1396 cm<sup>-1</sup>; <sup>1</sup>H NMR (600 MHz, CDCl<sub>3</sub>, δ): 10.19 (s, 1H), 8.72 (s, 1H), 8.35 (s, 1H), 8.31 (s, 1H), 8.27 (d, *J* = 8.2 Hz, 1H), 8.16 (s, 1H), 8.13 (d, *J* = 8.4 Hz, 1H), 8.01 (d, *J* = 8.2 Hz, 2H), 7.57–7.47 (m, 4H), 6.81 (s, 1H), 2.45 (s, 3H), 2.39 (s, 3H); <sup>13</sup>C NMR (151 MHz, CDCl<sub>3</sub>,

$\delta$ ): 147.7 (C), 142.7 (C), 140.7 (C), 135.2 (C), 134.5 (C), 131.3 (C), 130.9 (C), 130.8 (CH), 130.6 (C), 130.4 (C), 129.2 (CH), 128.1 (CH), 128.0 (CH), 127.7 (CH), 126.9 (C), 126.6 (CH), 126.2 (CH), 125.1 (C), 125.0 (CH), 124.8 (C), 124.2 (CH), 124.1 (CH), 124.0 (CH), 122.1 (C), 117.7 (CH), 115.1 (CH), 100.3 (CH), 15.1 (CH<sub>3</sub>), 14.1 (CH<sub>3</sub>); HRMS (ESI) calcd for C<sub>29</sub>H<sub>21</sub>N<sub>2</sub> [M + H]<sup>+</sup>: 397.1699, found 397.1699; Anal. Calcd for C<sub>29</sub>H<sub>20</sub>N<sub>2</sub>: C, 87.85; H, 5.08; N, 7.07. Found: C, 87.59; H, 5.13; N, 6.88.

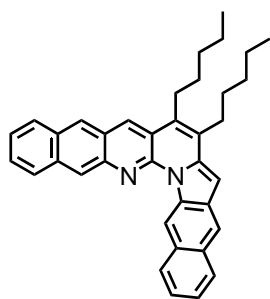

**7,8-Dipentylbenzo[*f*]indolo[1,2-*a*]naphtho[2,3-*g*][1,8]naphthyridine (7b).** To a heated toluene (1 mL) solution of RhCl(PPh<sub>3</sub>)<sub>3</sub> (9.2 mg, 0.01 mmol) was slowly added a toluene (1 mL) solution of carbodiimide **3b** (50.9 mg, 0.10 mmol). After being stirred for 20 min, the mixture was cooled to room temperature, and manganese(IV) oxide (26.0 mg, 0.30 mmol) was added. The mixture was stirred for 24 h, and the resulting insoluble material was removed by passing through Celite. The filtrate was evaporated and the residue was purified by column chromatography (chloroform/hexane = 1/2) to give **7b** (40.2 mg, 79%) as a red solid: Mp 174.7–175.1 °C; IR (KBr) 3046, 2923, 2854, 1589, 1535, 1457, 1396 cm<sup>-1</sup>; <sup>1</sup>H NMR (600 MHz, CDCl<sub>3</sub>,  $\delta$ ) 10.21 (s, 1H), 8.72 (s, 1H), 8.37 (s, 1H), 8.32 (s, 1H), 8.27 (d, *J* = 7.8 Hz, 1H), 8.15 (s, 1H), 8.12 (d, *J* = 8.3 Hz, 1H), 8.01 (d, *J* = 8.1 Hz, 2H), 7.55–7.46 (m, 4H), 6.83 (s, 1H), 2.87 (dd, *J* = 6.8, 9.9 Hz, 2H), 2.78 (dd, *J* = 6.8, 9.8 Hz, 2H), 1.78–1.69 (m, 4H), 1.60–1.50 (m, 4H), 1.49–1.43 (m, 4H), 0.99 (t, *J* = 7.3 Hz, 3H), 0.98 (t, *J* = 7.3 Hz, 3H); <sup>13</sup>C NMR (151 MHz, CDCl<sub>3</sub>,  $\delta$ ) 148.0 (C), 142.6 (C), 140.2 (C), 135.1 (C), 134.5 (C), 131.3 (C), 131.2 (C), 130.9 (CH), 130.8 (C), 130.7 (C), 130.4 (C), 129.9 (C), 129.2 (CH), 128.1 (CH), 128.0 (CH), 127.7 (CH), 126.6 (CH), 126.1 (CH), 125.0 (CH), 124.8 (C), 124.1 (CH), 124.0 (CH), 123.9 (CH), 121.2 (C), 117.6 (CH), 115.2 (CH), 100.2 (CH), 32.4 (CH<sub>2</sub> × 2), 29.6 (CH<sub>2</sub>), 29.5 (CH<sub>2</sub>), 29.4 (CH<sub>2</sub>), 27.8 (CH<sub>2</sub>), 22.6 (CH<sub>2</sub> × 2), 14.1 (CH<sub>3</sub> × 2); HRMS (ESI) calcd for C<sub>37</sub>H<sub>37</sub>N<sub>2</sub> [M + H]<sup>+</sup>: 509.2951, found 509.2952; Anal. Calcd for C<sub>37</sub>H<sub>36</sub>N<sub>2</sub>: C, 87.36; H, 7.13; N, 5.51. Found: C, 87.15; H, 7.36; N, 5.43.

## 2. NMR Spectra

1a

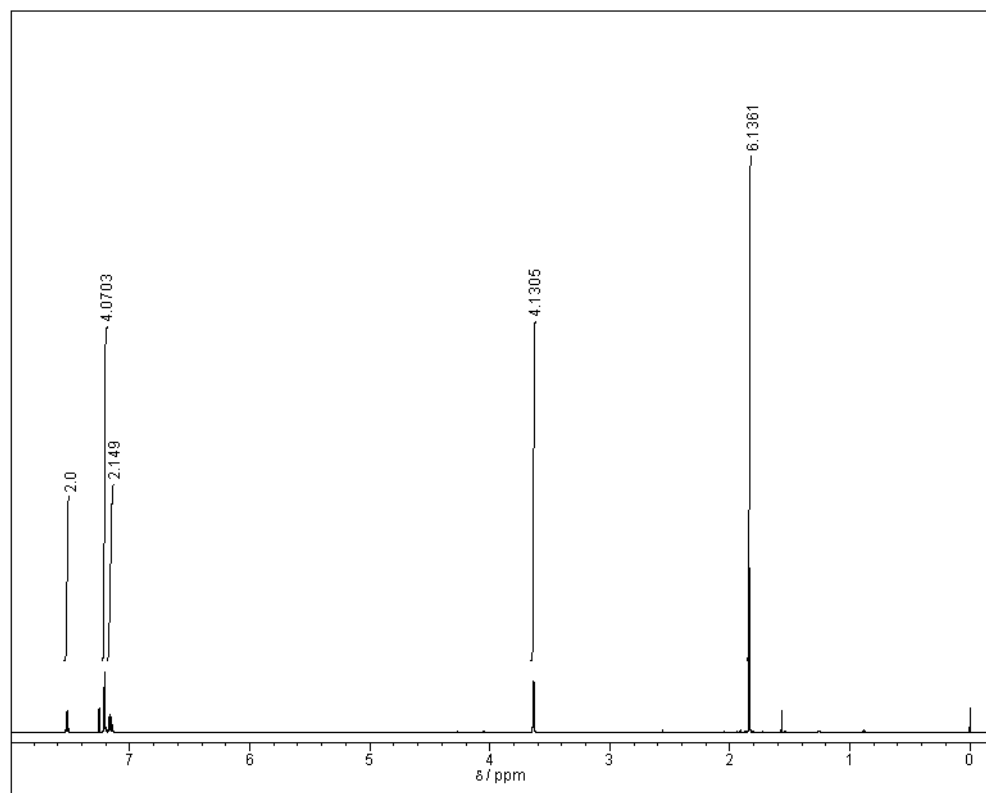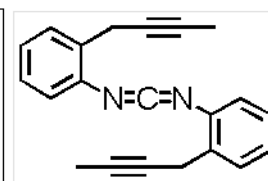

|         |                   |
|---------|-------------------|
| ObsNuc  | <sup>1</sup> H    |
| ObsFreq | 600.13 MHz        |
| Solvent | CDCl <sub>3</sub> |

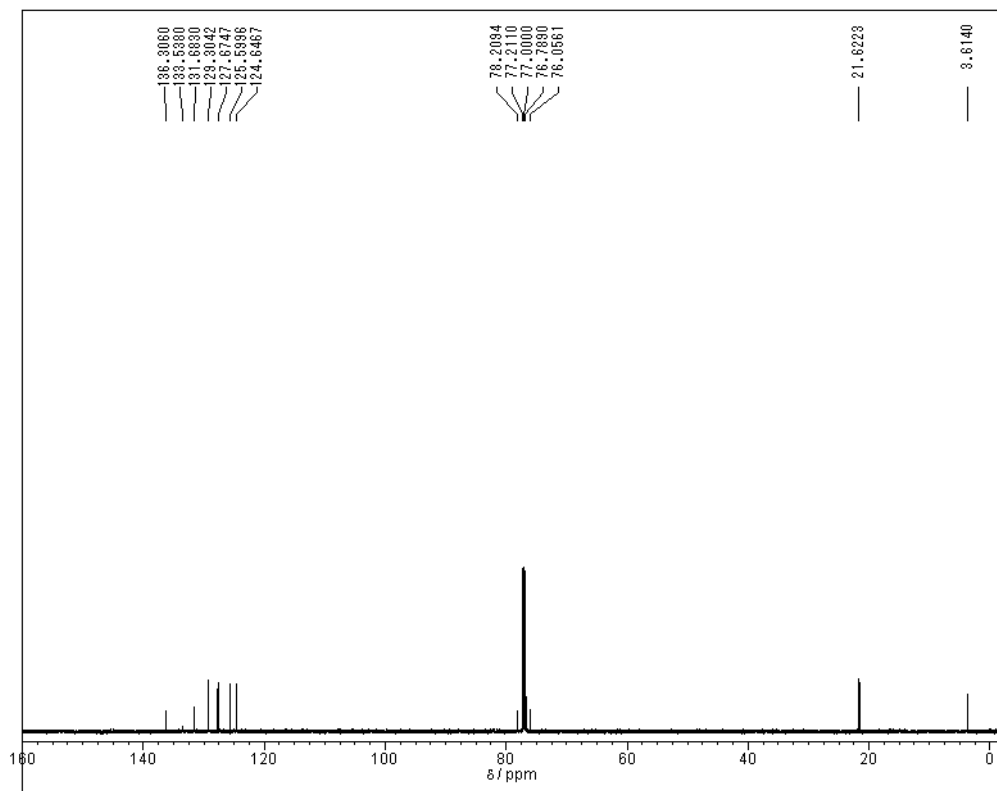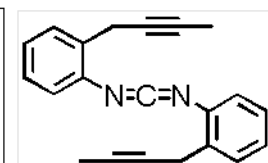

|         |                   |
|---------|-------------------|
| ObsNuc  | <sup>13</sup> C   |
| ObsFreq | 150.9 MHz         |
| Solvent | CDCl <sub>3</sub> |

1b

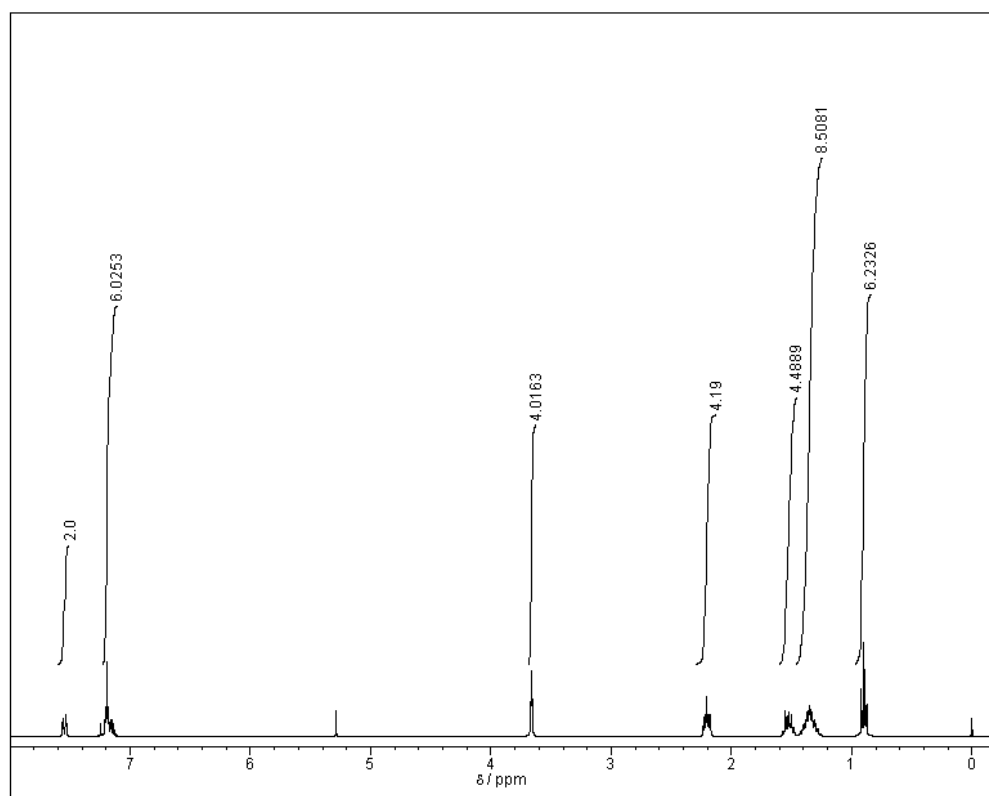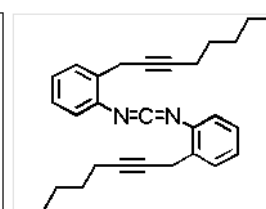

ObsNuc  $^1\text{H}$   
ObsFreq 300.4 MHz  
Solvent  $\text{CDCl}_3$

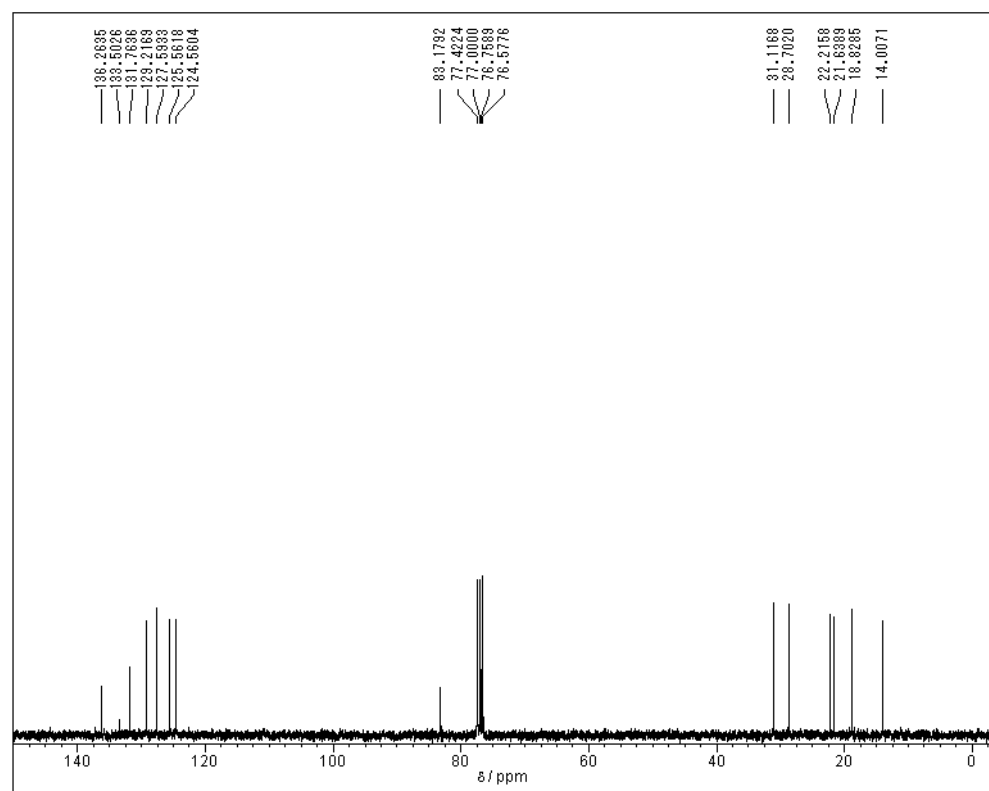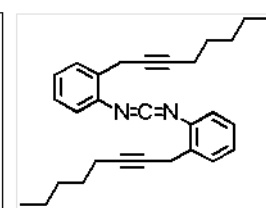

ObsNuc  $^{13}\text{C}$   
ObsFreq 75.45 MHz  
Solvent  $\text{CDCl}_3$

S2a

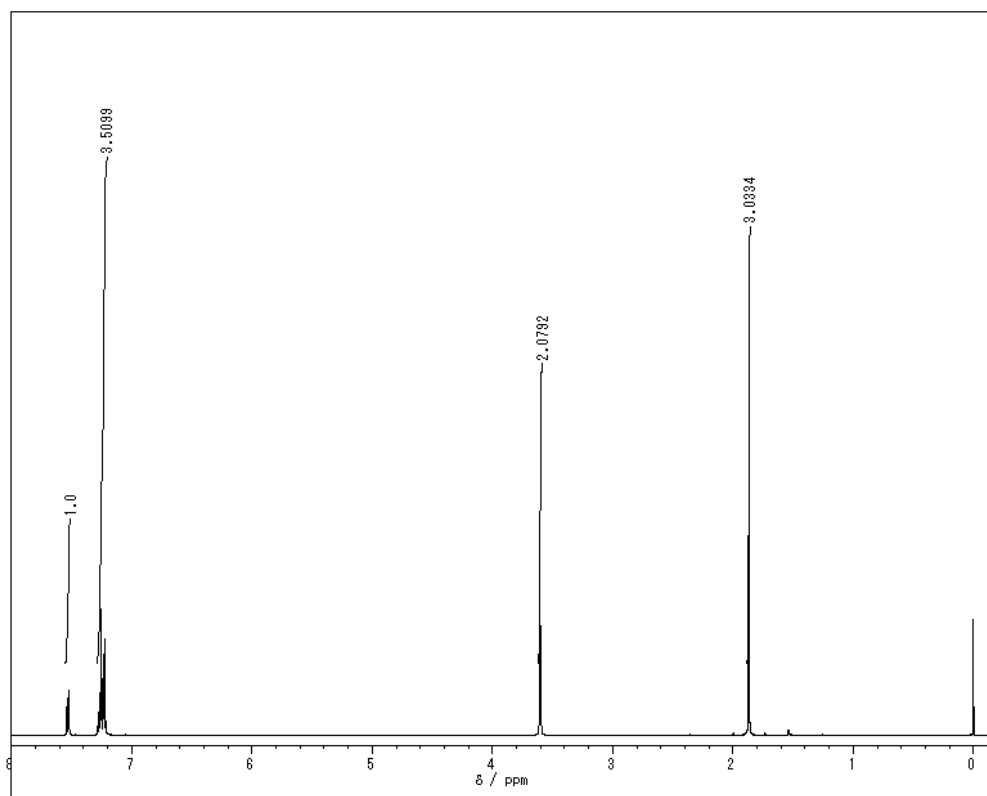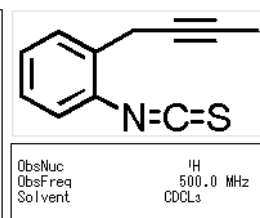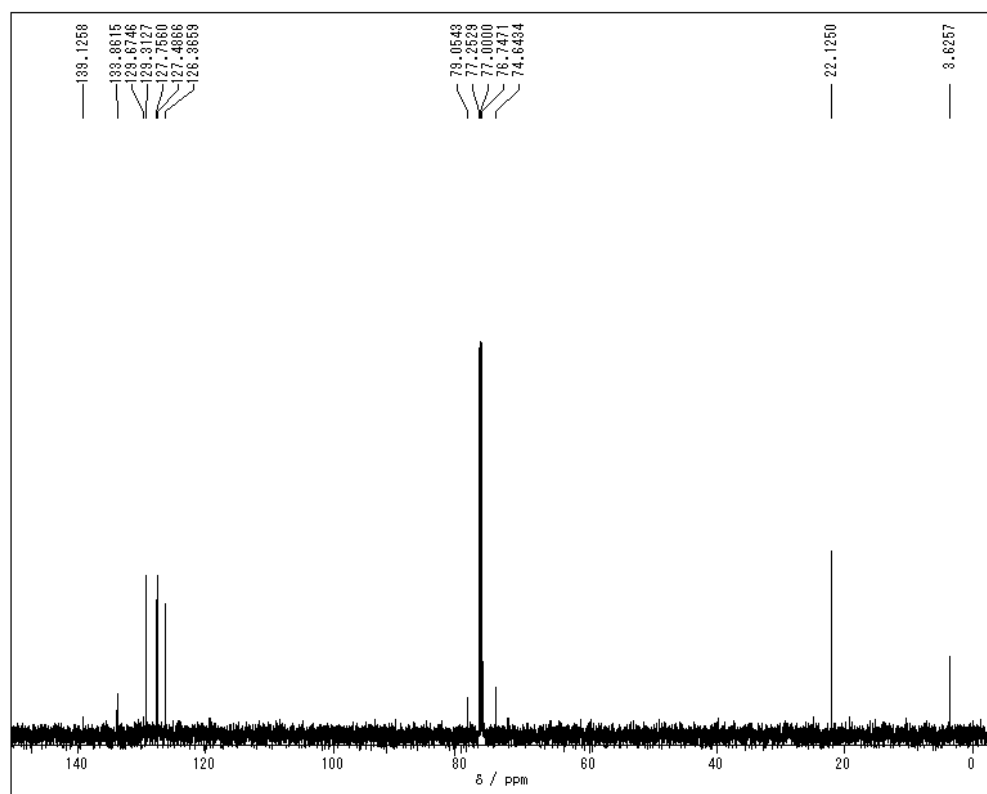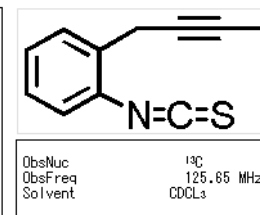

S2b

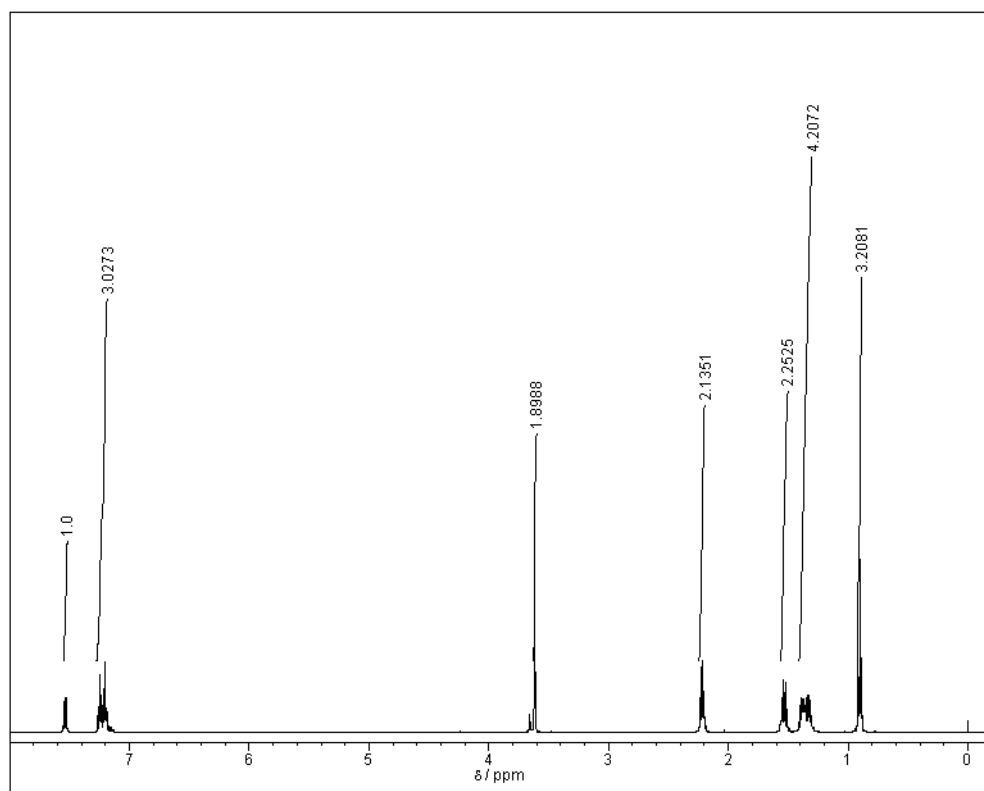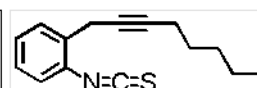

ObsNuc <sup>1</sup>H  
ObsFreq 500.0 MHz  
Solvent CDCl<sub>3</sub>

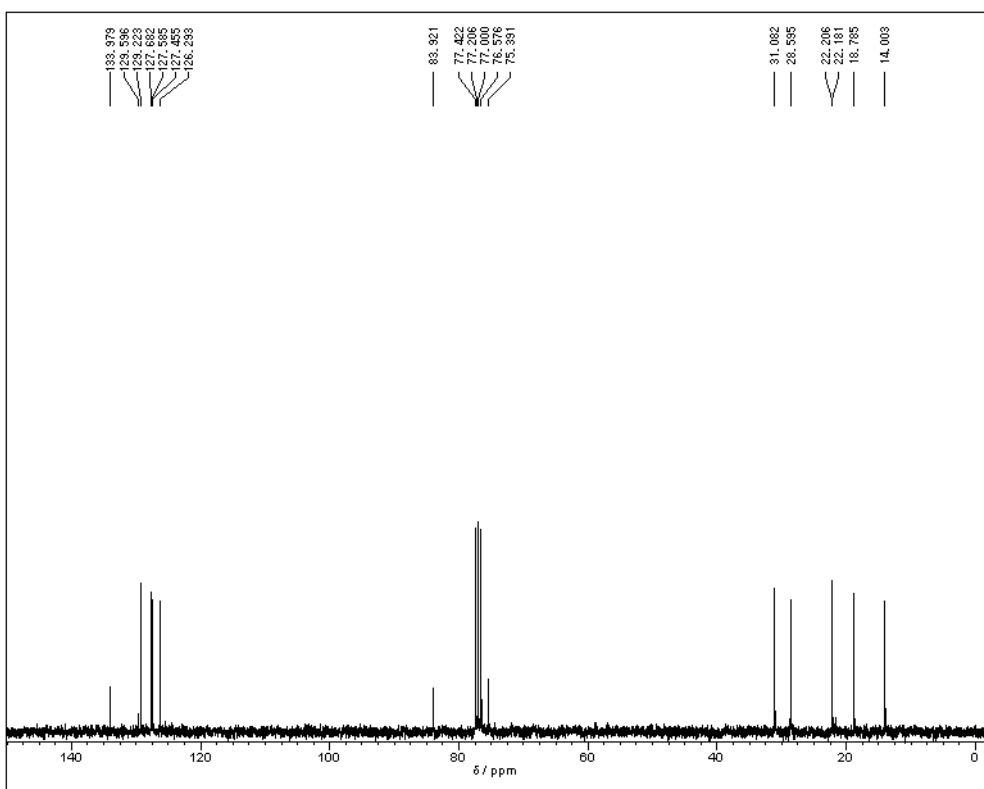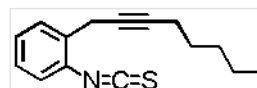

ObsNuc <sup>13</sup>C  
ObsFreq 75.45 MHz  
Solvent CDCl<sub>3</sub>

S4a

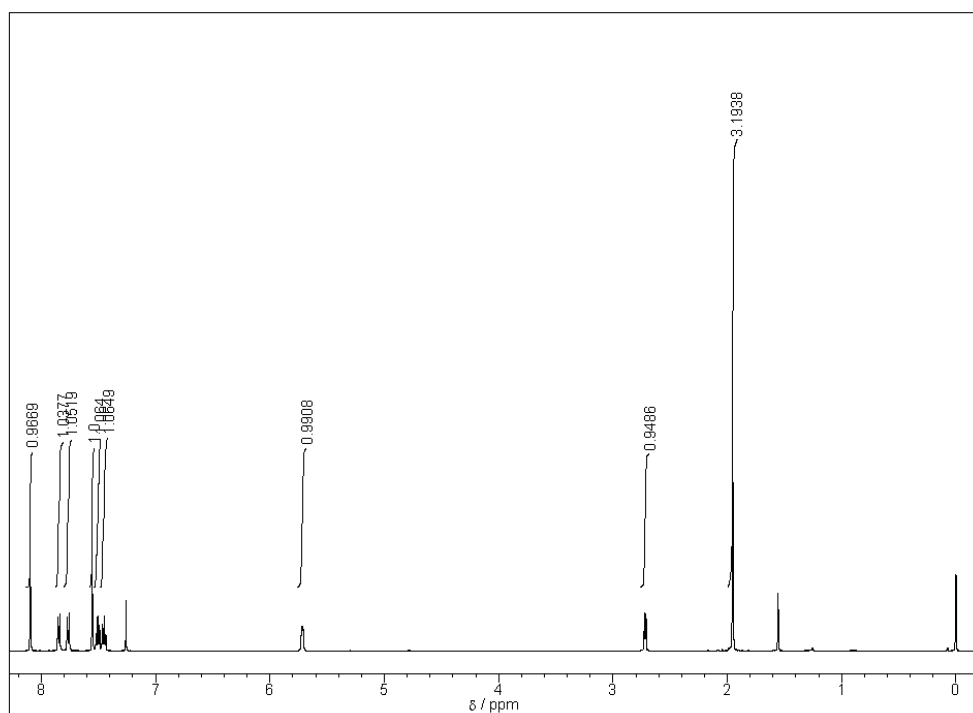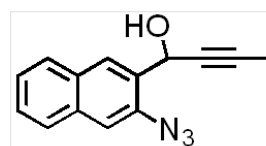

ObsNuc  $^1\text{H}$   
ObsFreq 500.0 MHz  
Solvent  $\text{CDCl}_3$

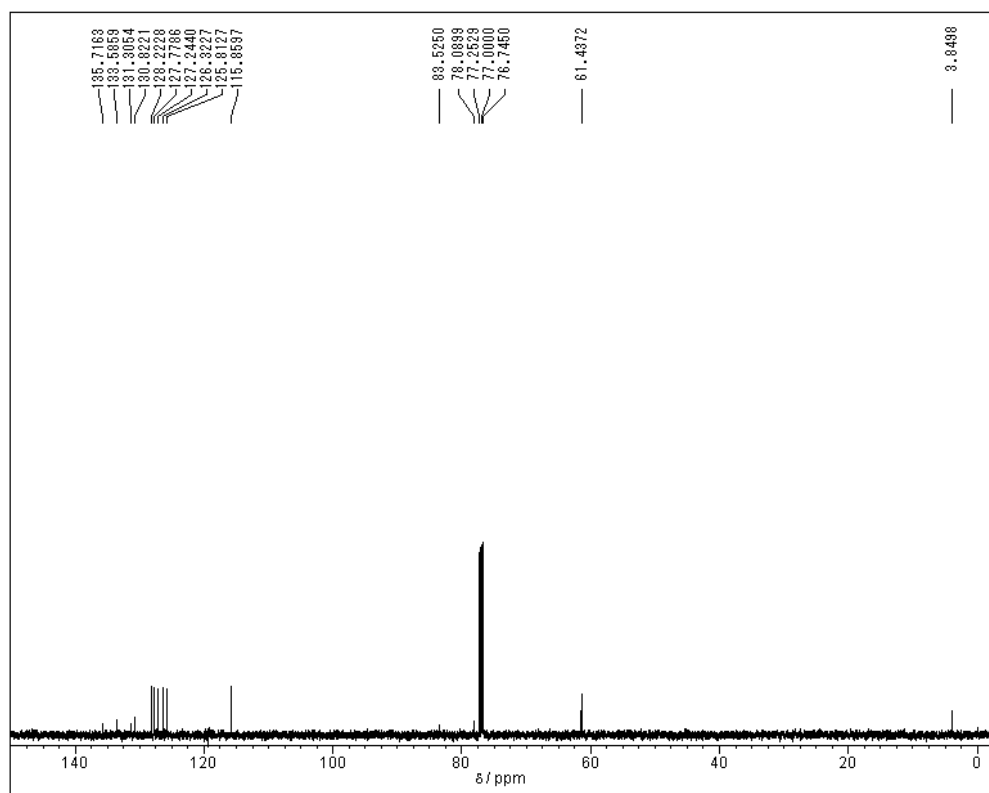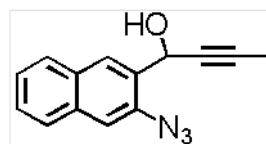

ObsNuc  $^{13}\text{C}$   
ObsFreq 125.65 MHz  
Solvent  $\text{CDCl}_3$



S4b

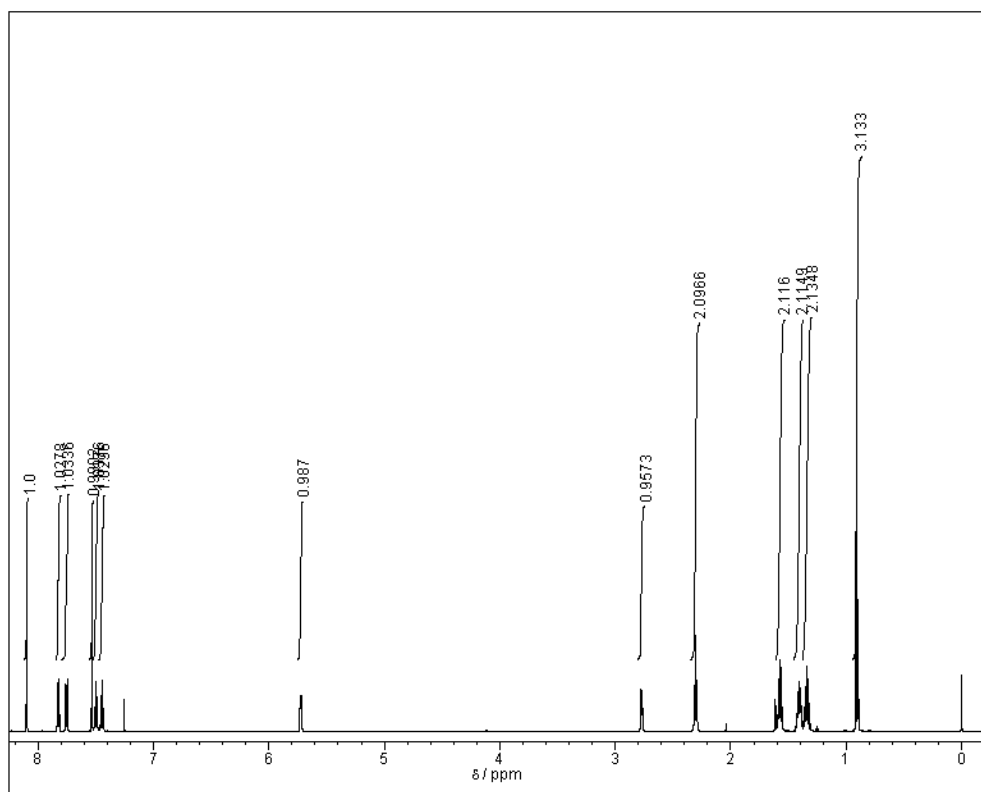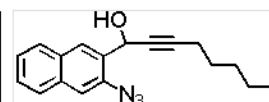

ObsNuc <sup>1</sup>H  
ObsFreq 600.13 MHz  
Solvent CDCl<sub>3</sub>

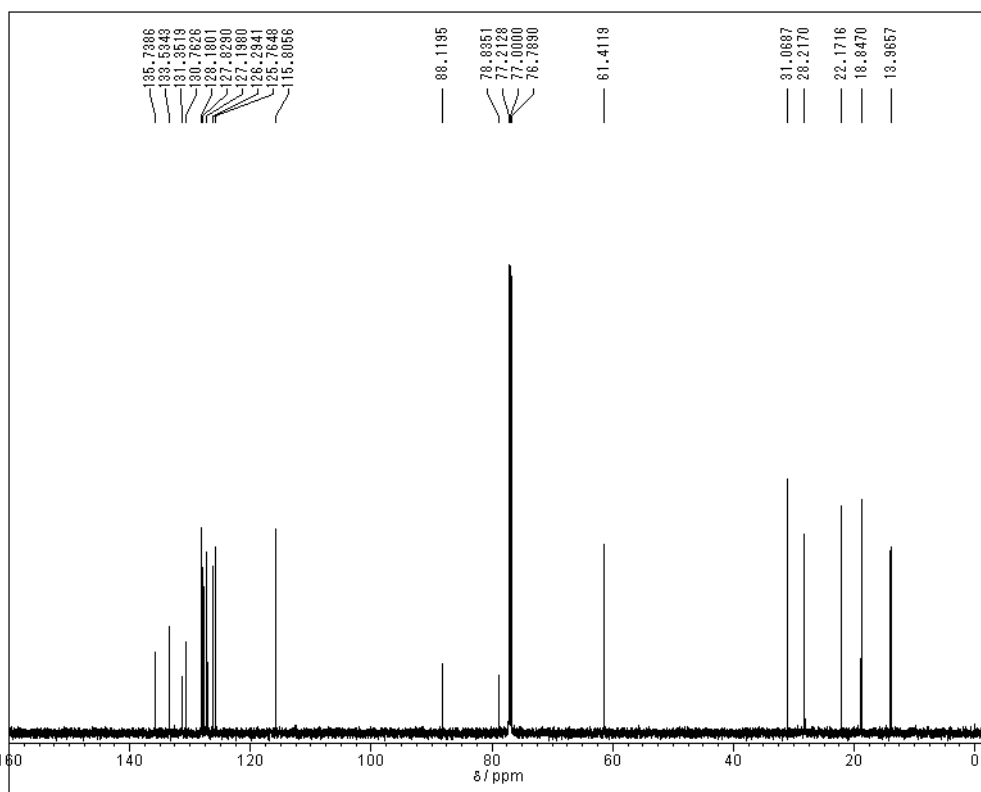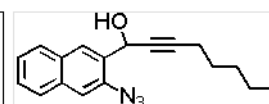

ObsNuc <sup>13</sup>C  
ObsFreq 150.9 MHz  
Solvent CDCl<sub>3</sub>

S5a

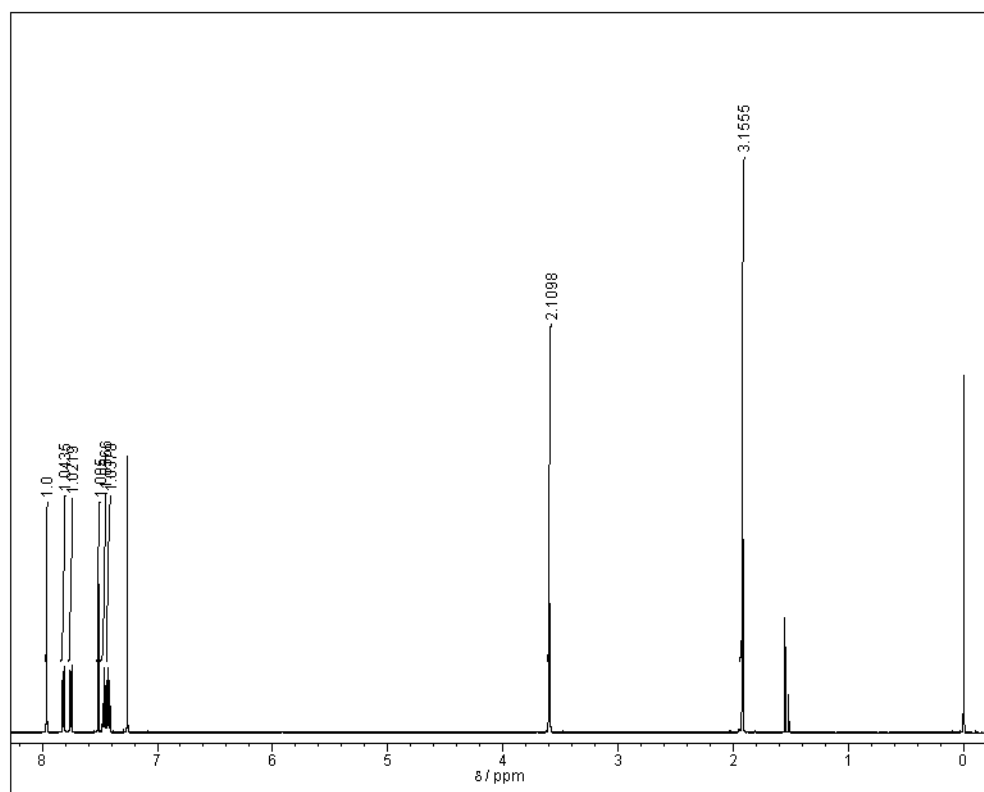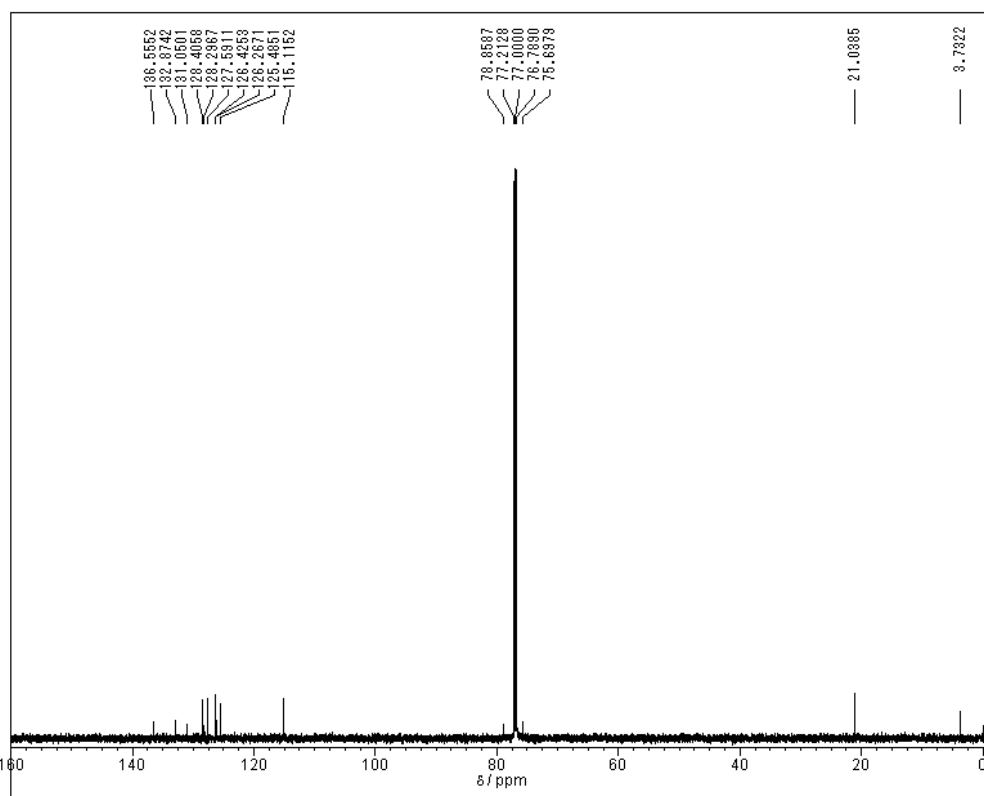

S5b

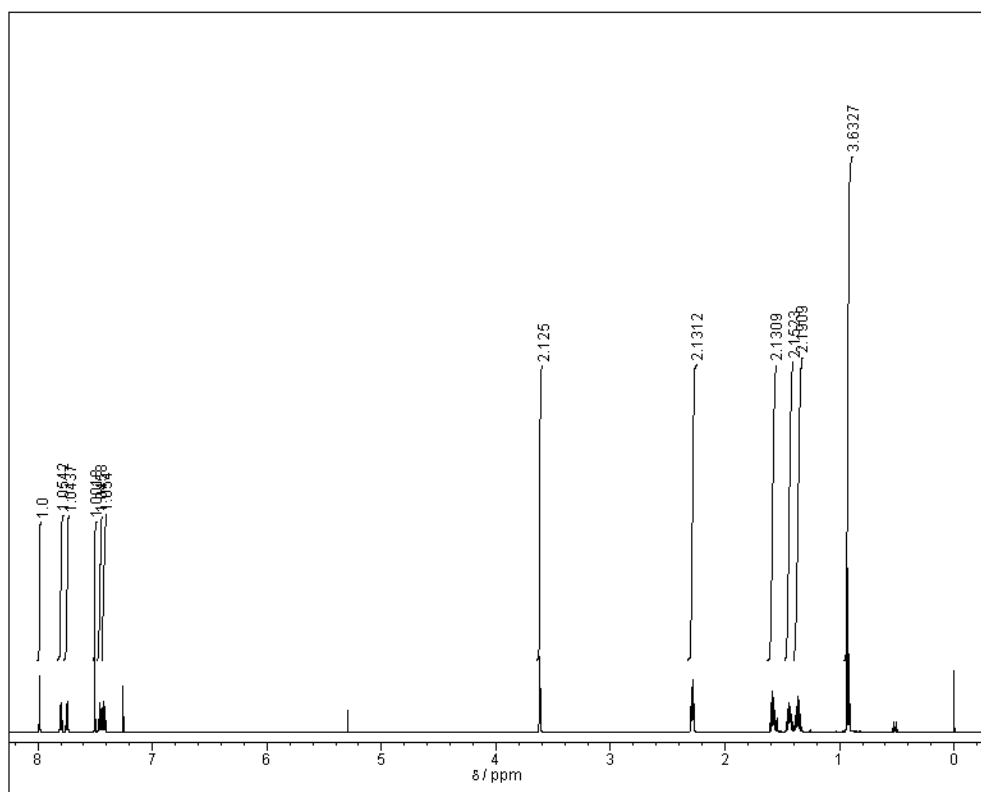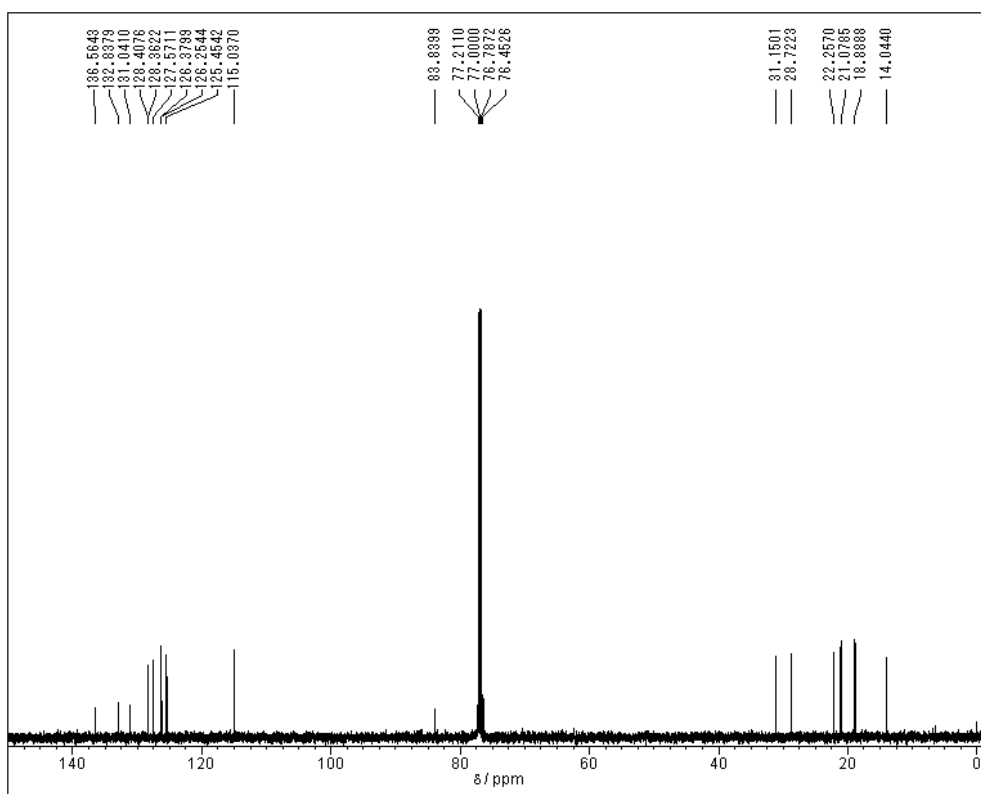

S6a

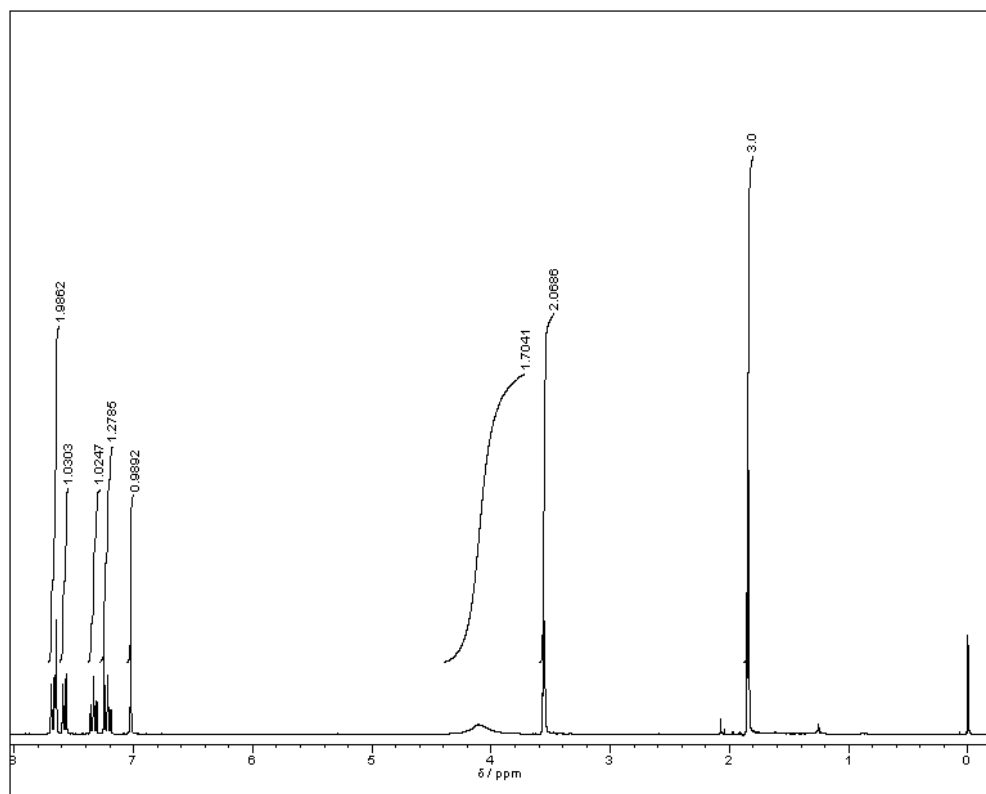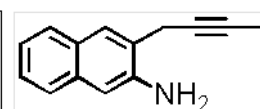

|         |                   |
|---------|-------------------|
| ObsNuc  | <sup>1</sup> H    |
| ObsFreq | 300.01 MHz        |
| Solvent | CDCl <sub>3</sub> |

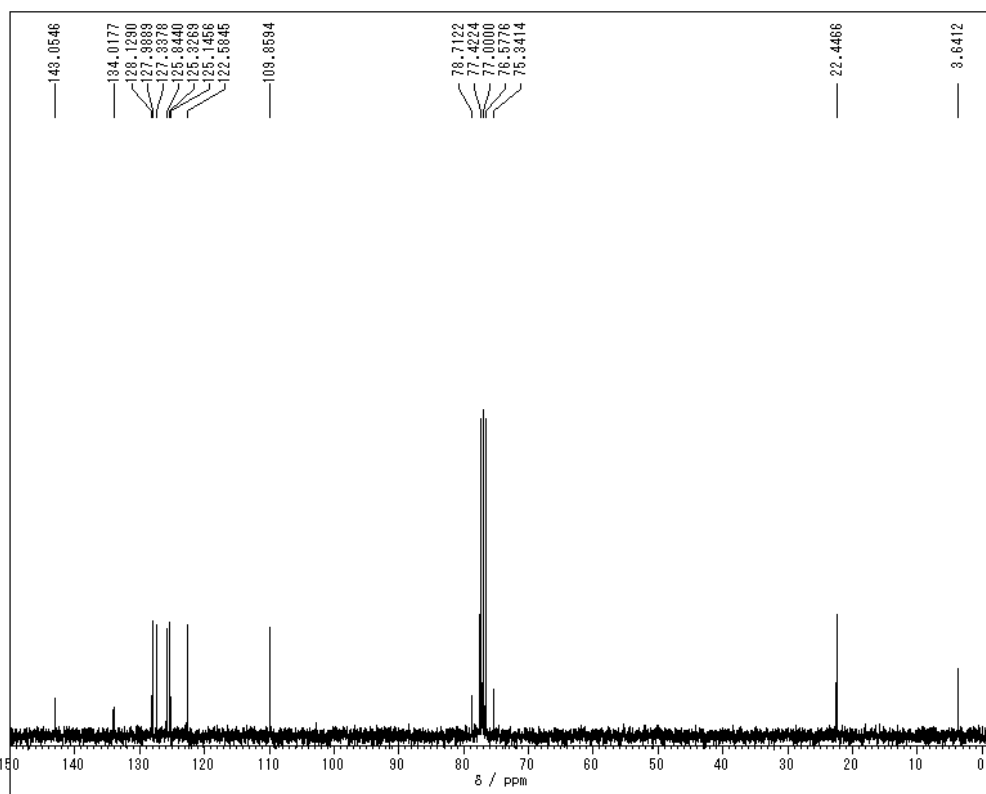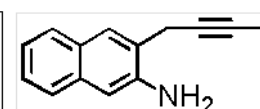

|         |                   |
|---------|-------------------|
| ObsNuc  | <sup>13</sup> C   |
| ObsFreq | 75.45 MHz         |
| Solvent | CDCl <sub>3</sub> |

S6b

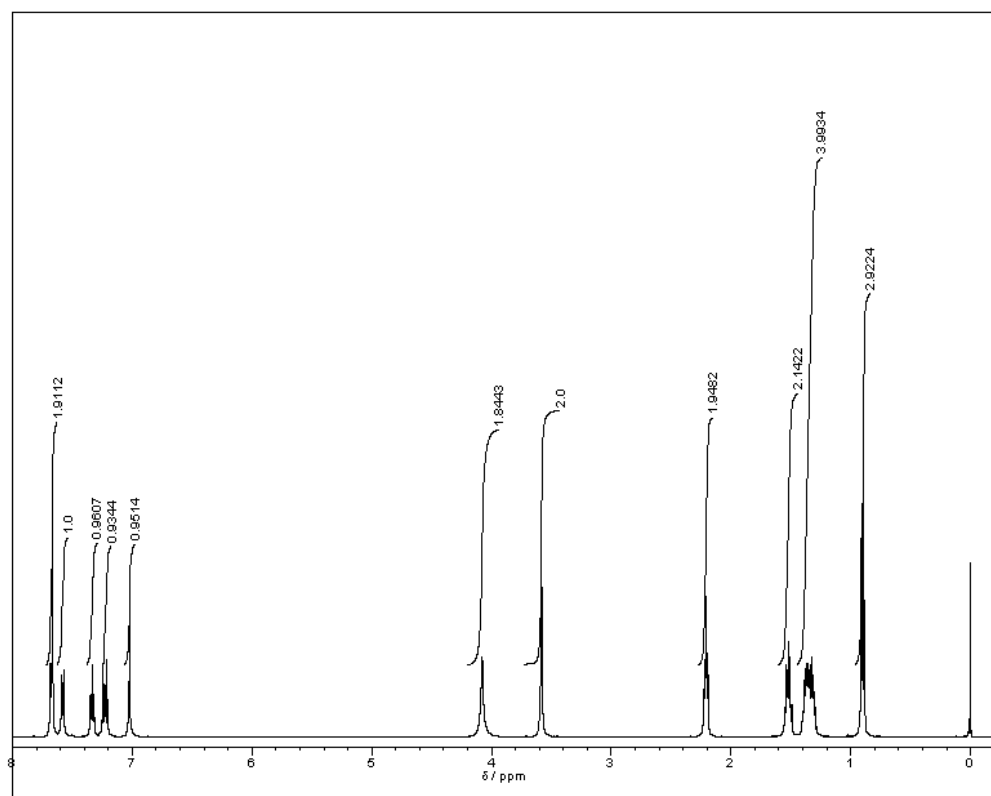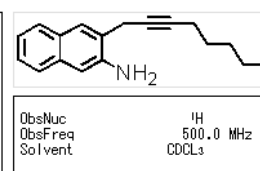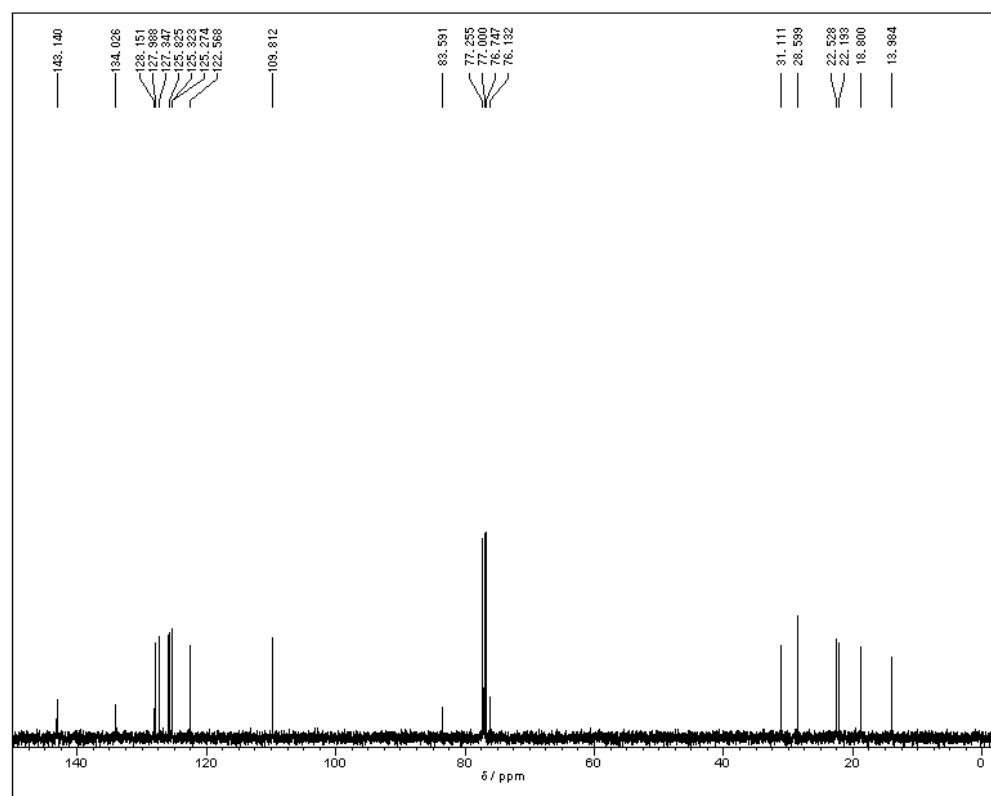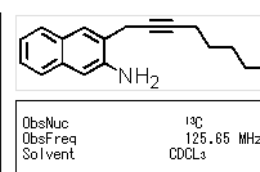

S7a

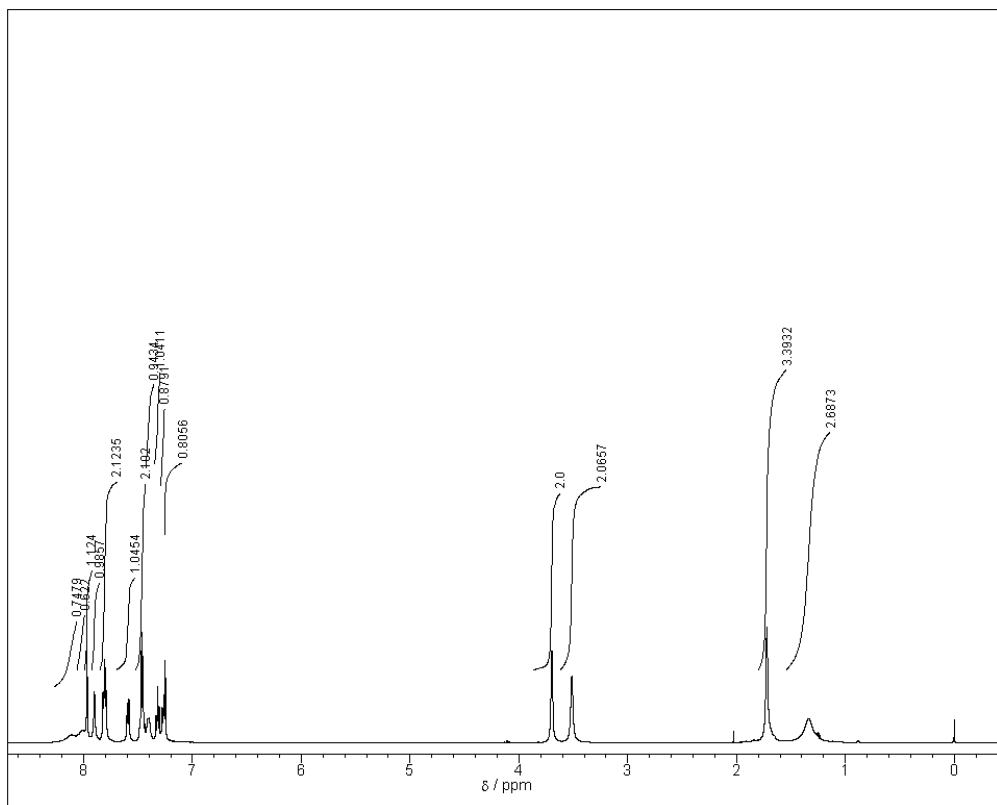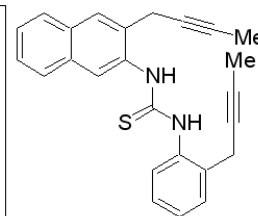

|         |                   |
|---------|-------------------|
| ObsNuc  | <sup>1</sup> H    |
| ObsFreq | 500.0 MHz         |
| Solvent | CDCl <sub>3</sub> |

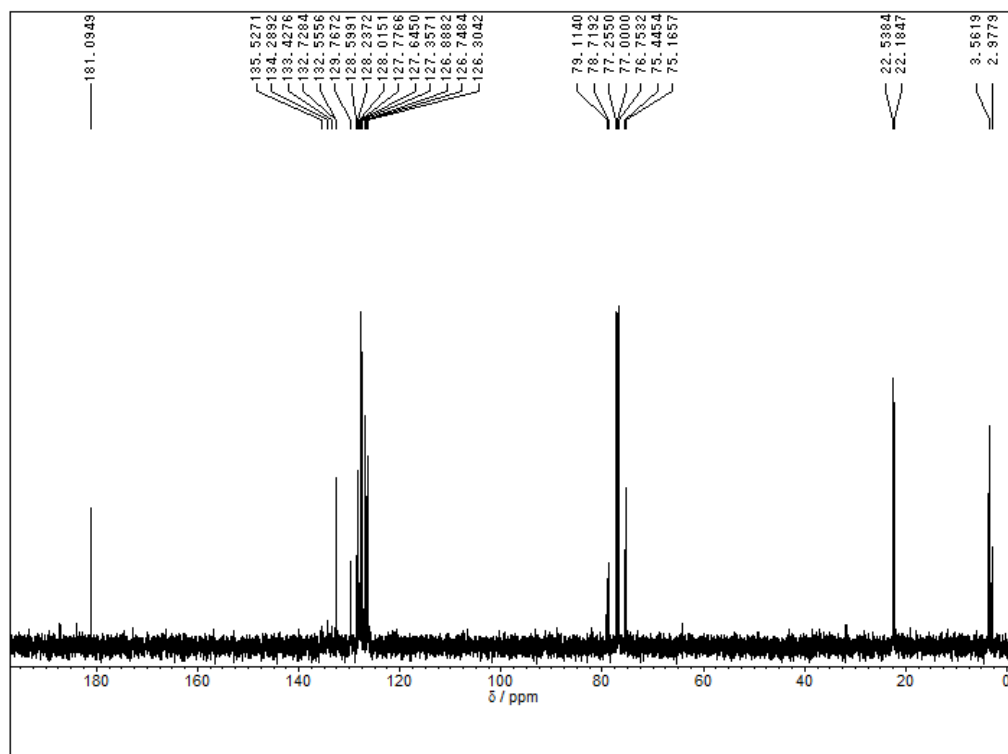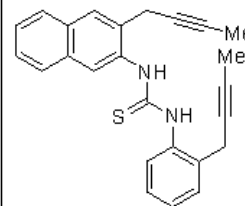

|         |                   |
|---------|-------------------|
| ObsNuc  | <sup>13</sup> C   |
| ObsFreq | 125.65 MHz        |
| Solvent | CDCl <sub>3</sub> |

S7b

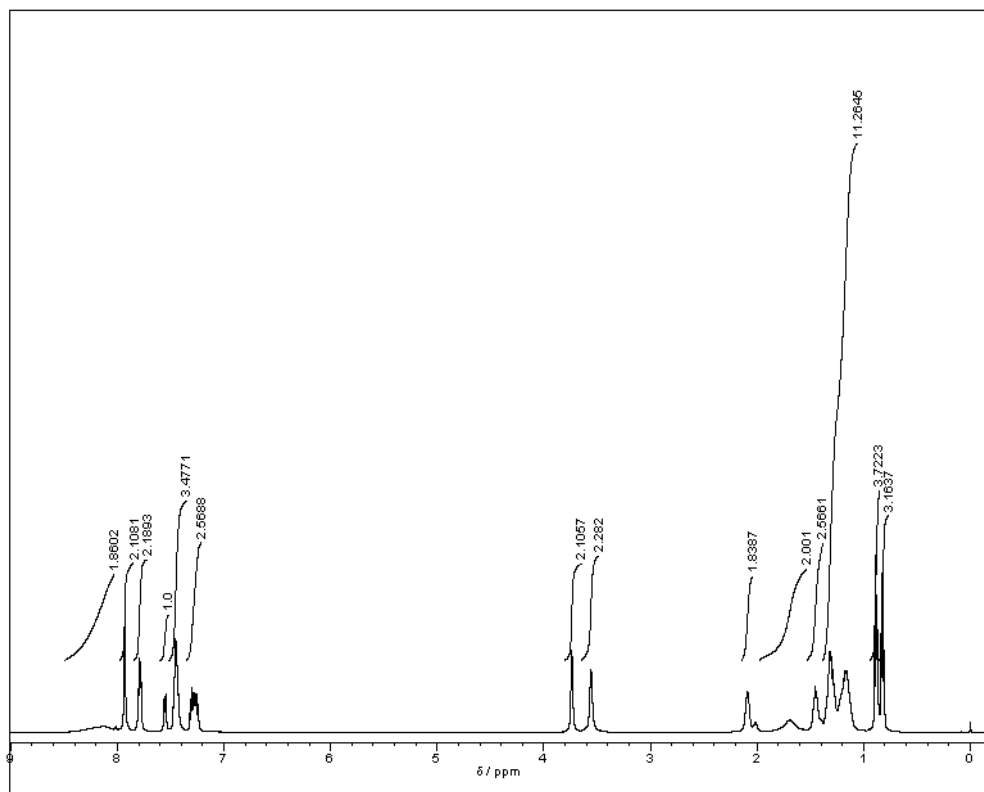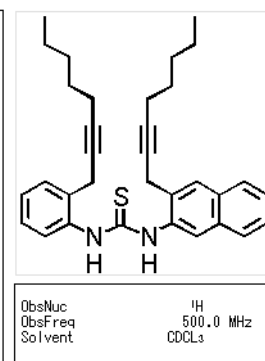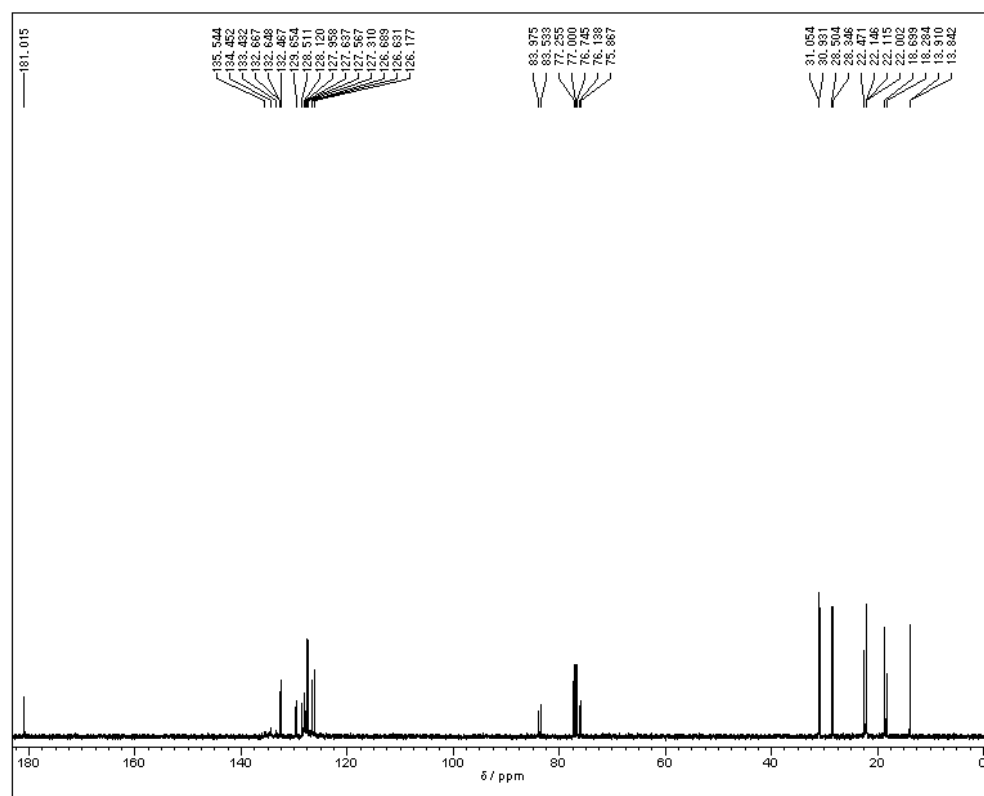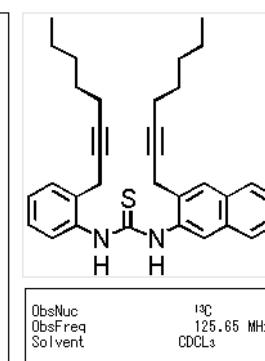

2a

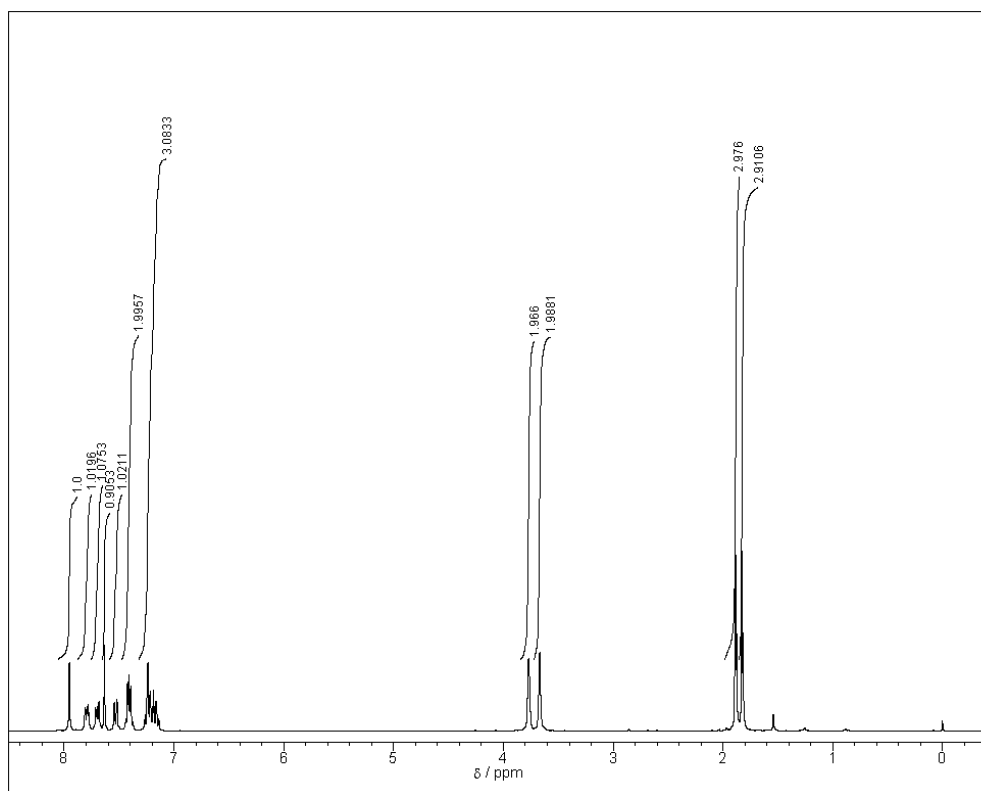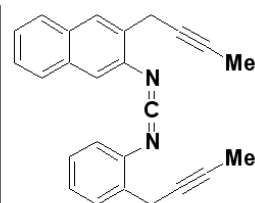

|       |                 |
|-------|-----------------|
| OBNUC | $^1\text{H}$    |
| OBFRQ | 300.4 MHz       |
| SLVNT | $\text{CDCl}_3$ |

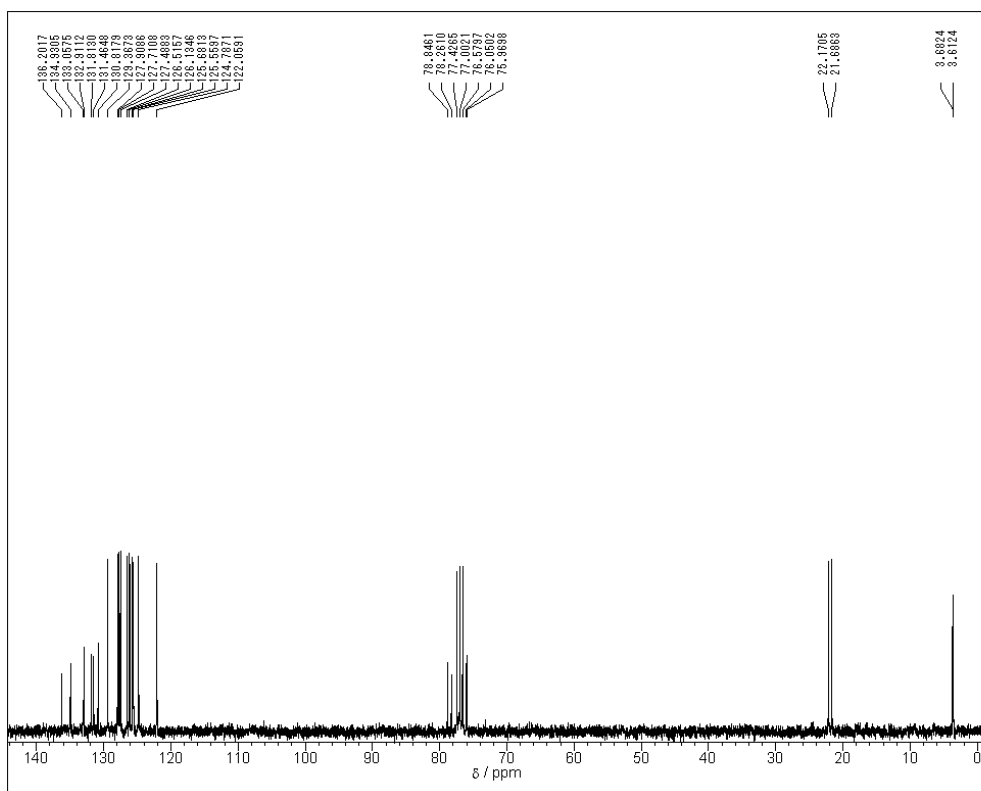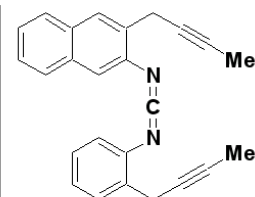

|         |                 |
|---------|-----------------|
| ObsNuc  | $^{13}\text{C}$ |
| ObsFreq | 75.45 MHz       |
| Solvent | $\text{CDCl}_3$ |



2b

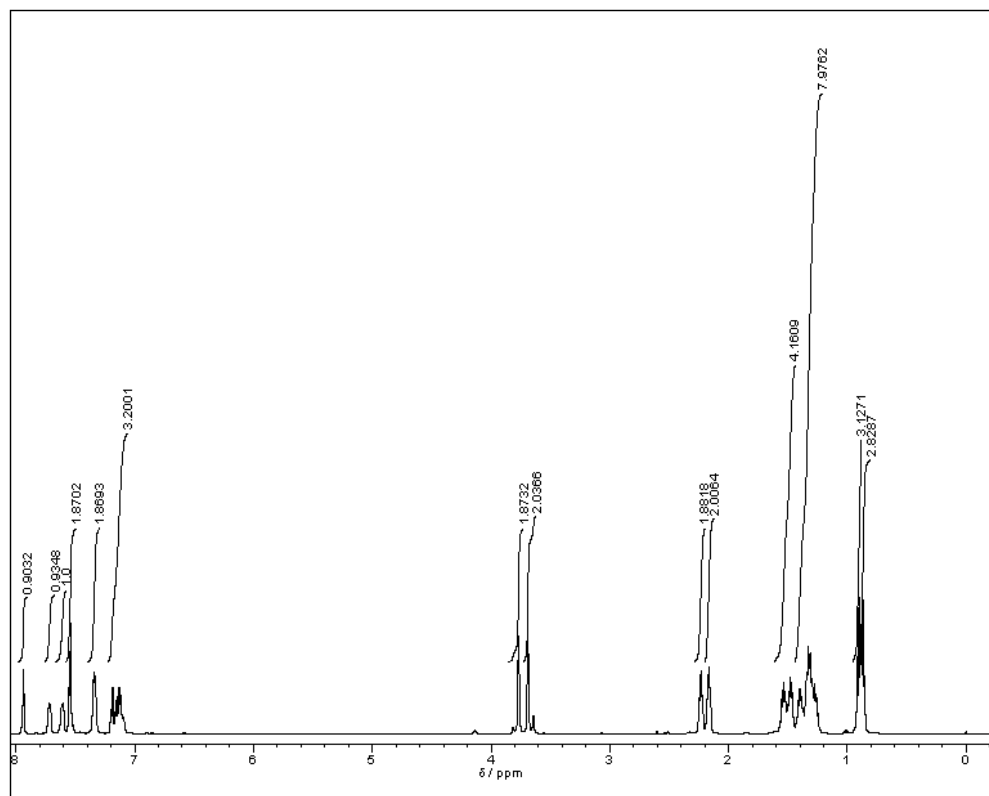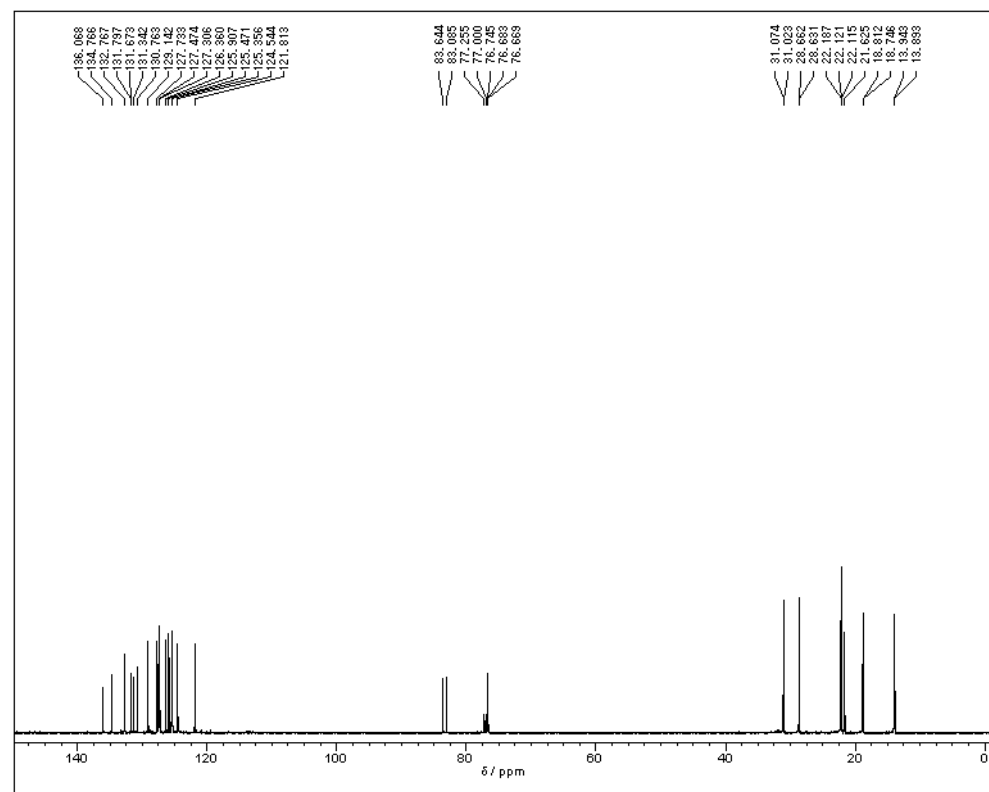

3a

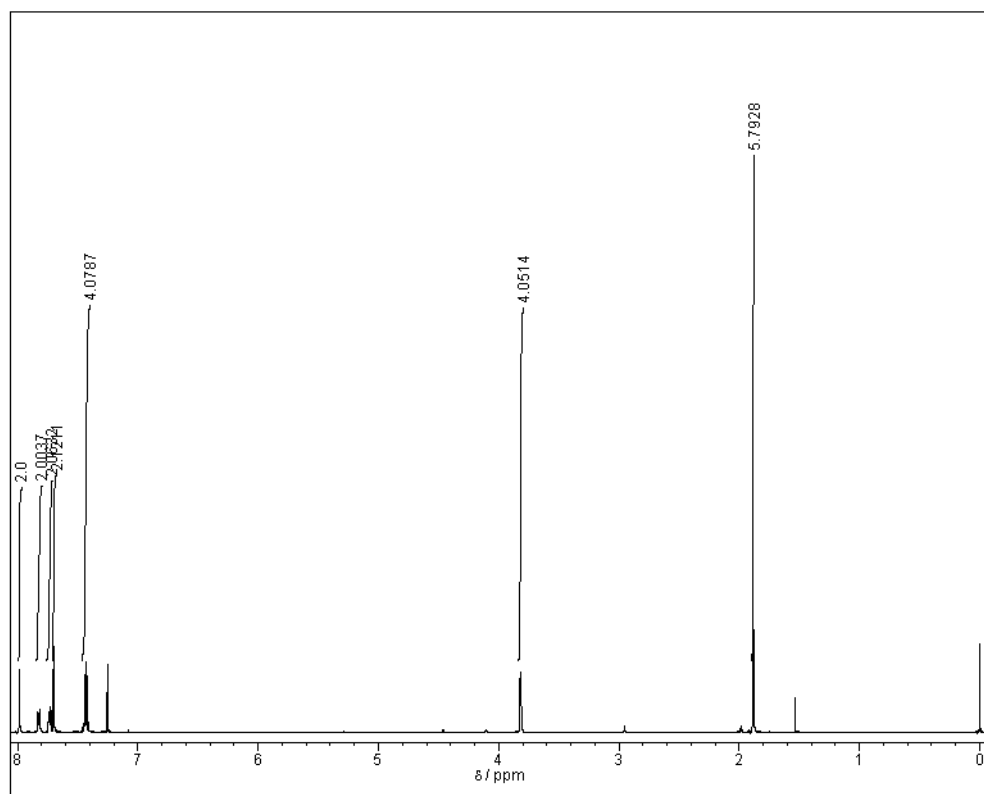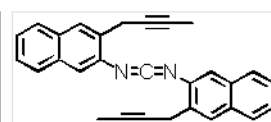

ObsNuc  $^1\text{H}$   
ObsFreq 500.0 MHz  
Solvent  $\text{CDCl}_3$

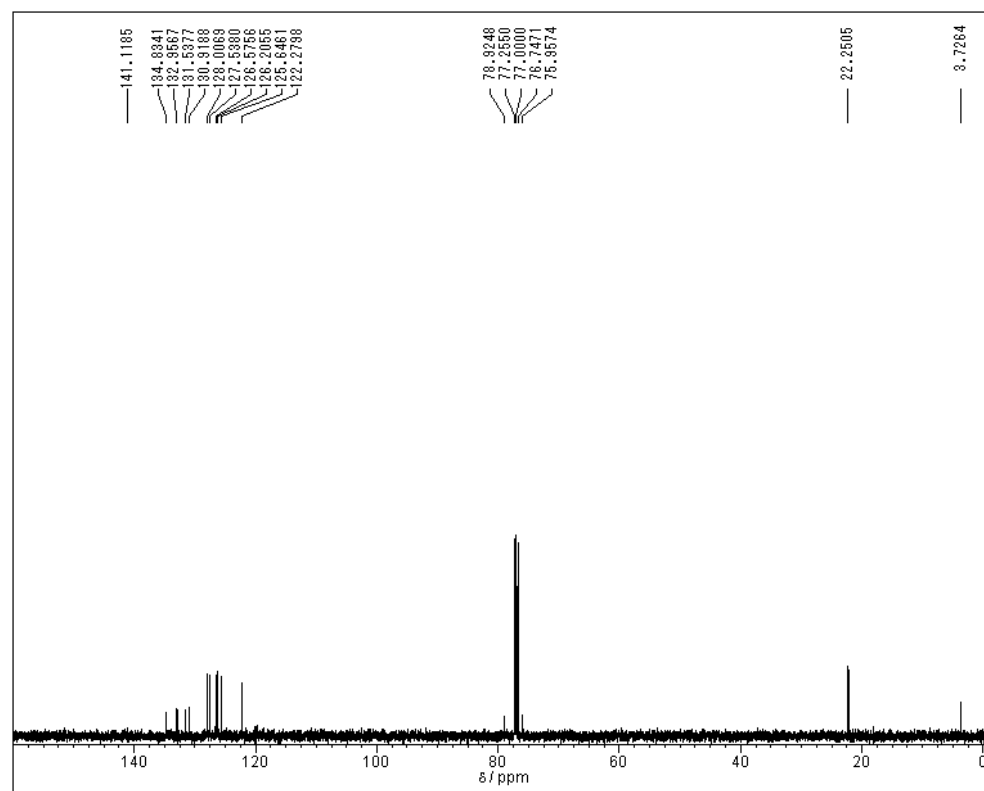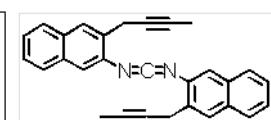

ObsNuc  $^{13}\text{C}$   
ObsFreq 125.65 MHz  
Solvent  $\text{CDCl}_3$

S8b

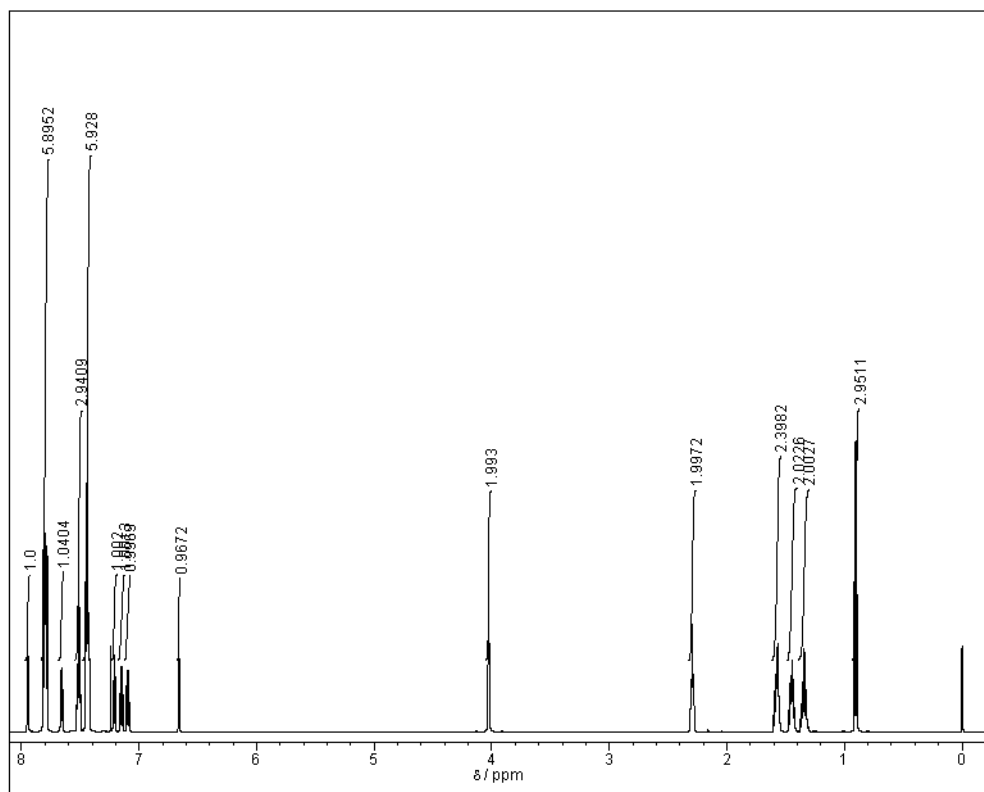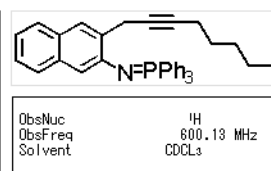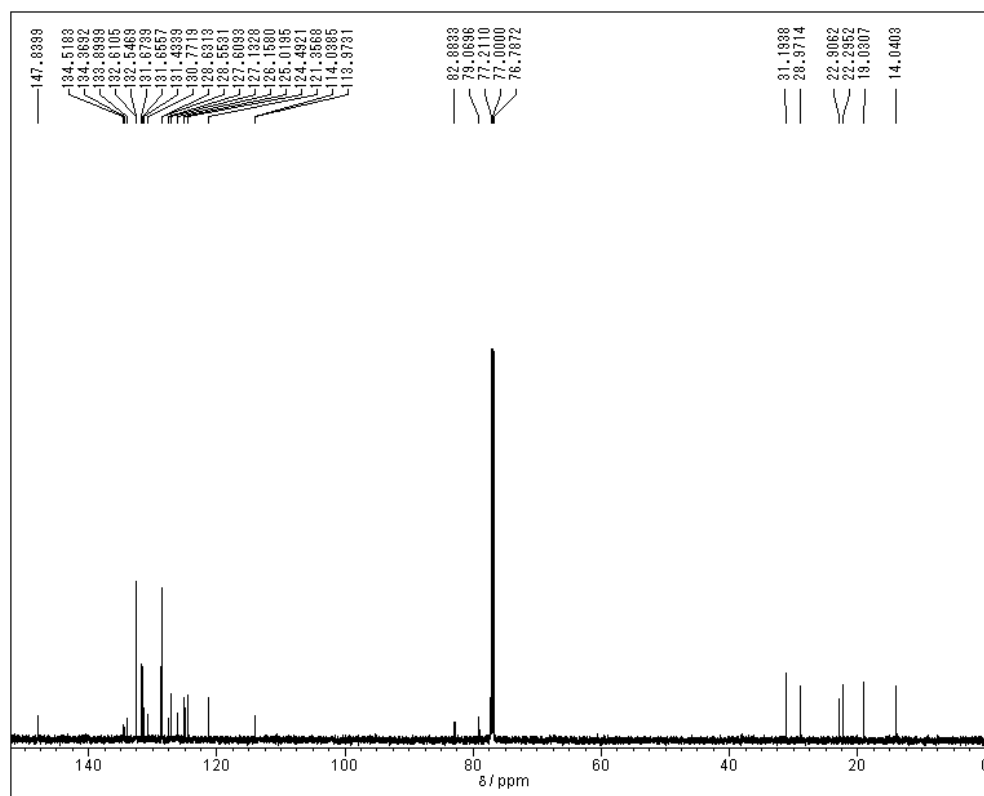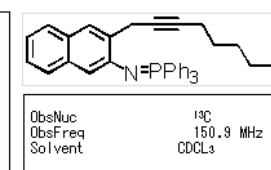

3b

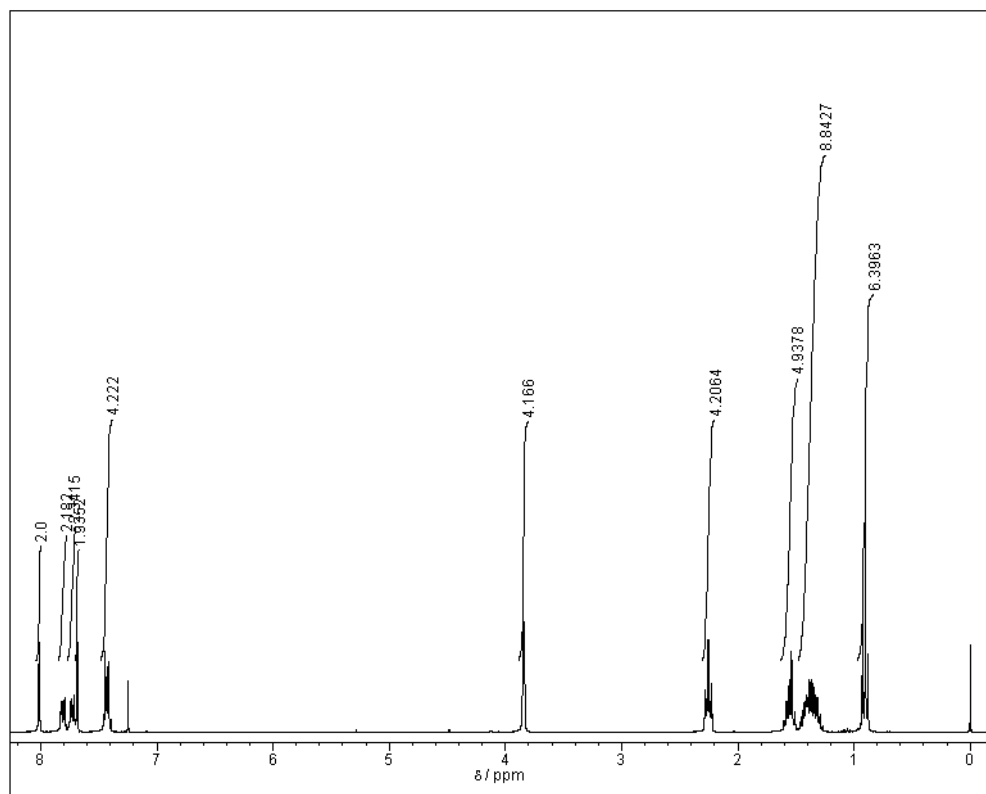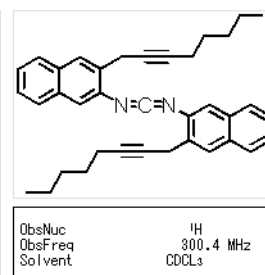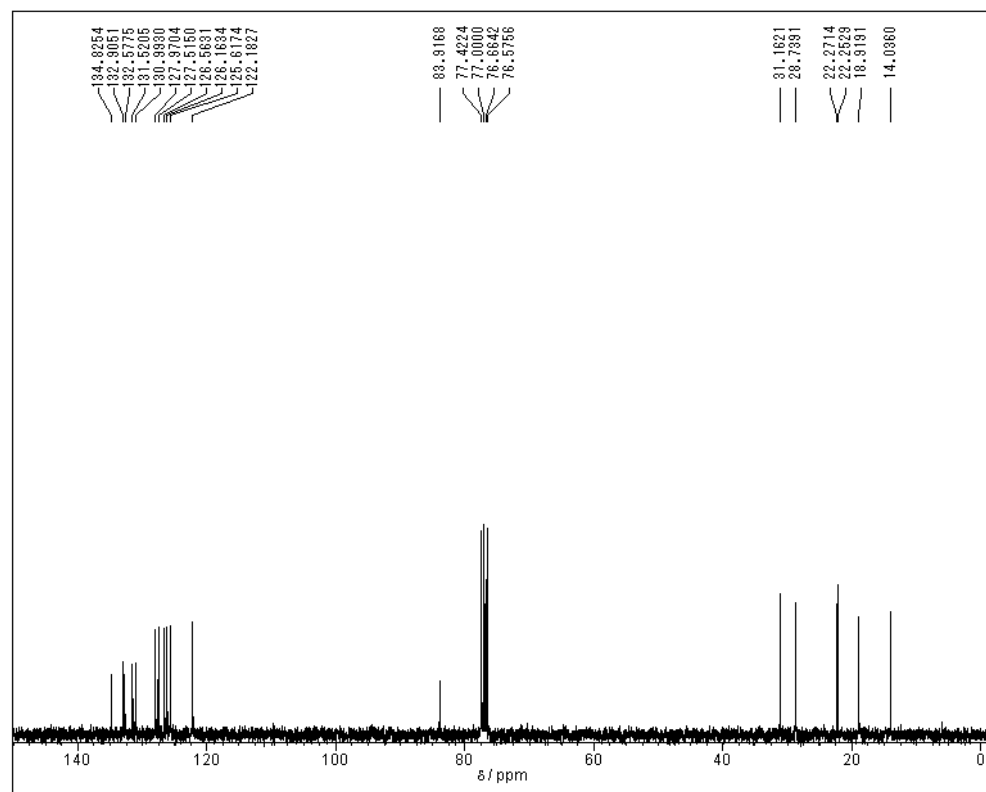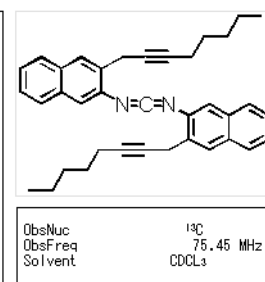

4a

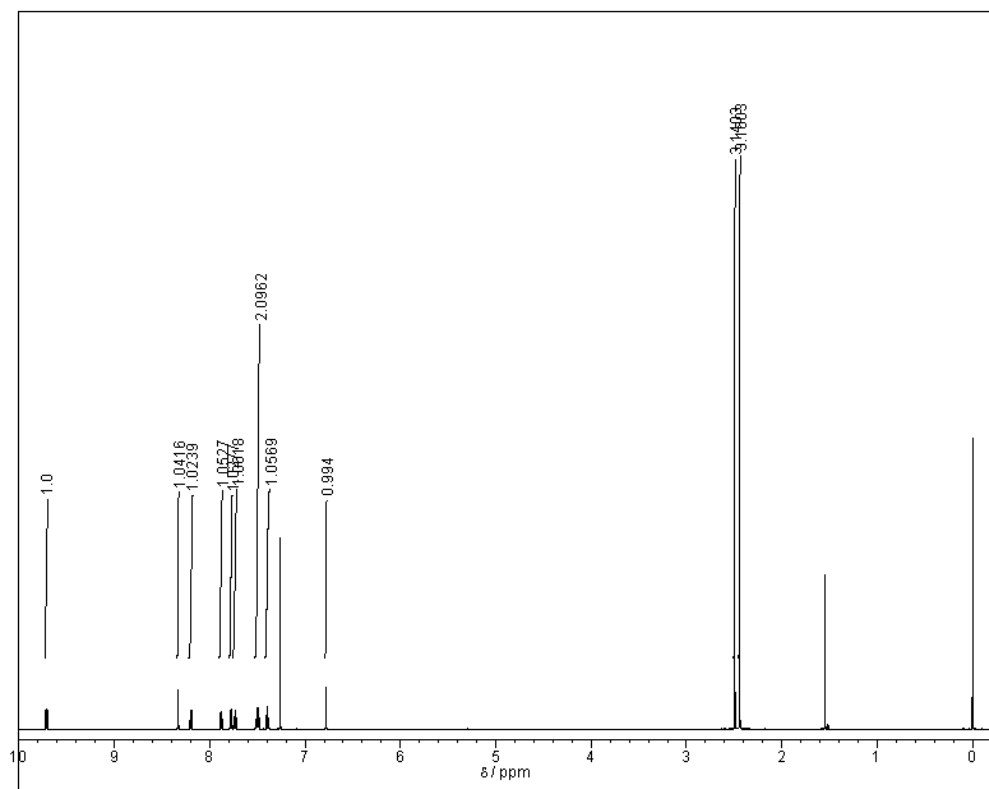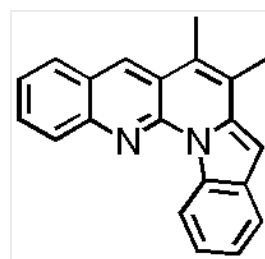

ObsNuc <sup>1</sup>H  
ObsFreq 600.13 MHz  
Solvent CDCl<sub>3</sub>

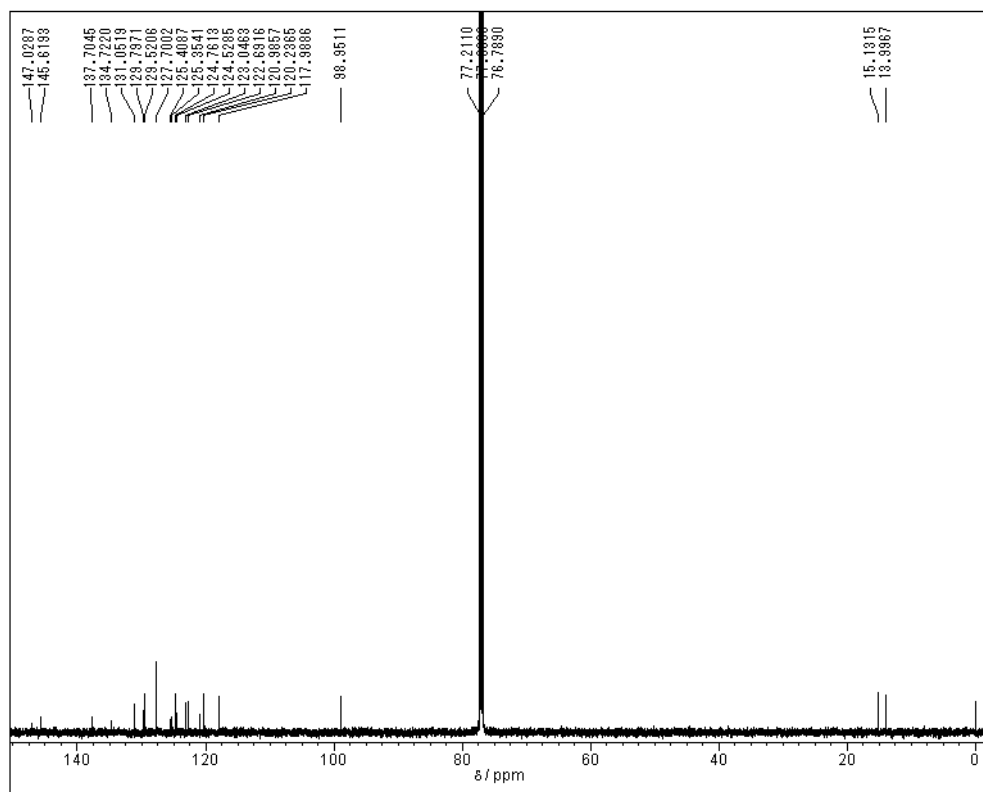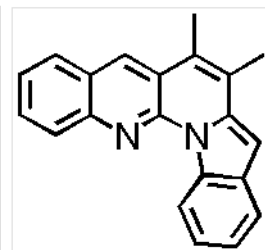

ObsNuc <sup>13</sup>C  
ObsFreq 150.9 MHz  
Solvent CDCl<sub>3</sub>

4b

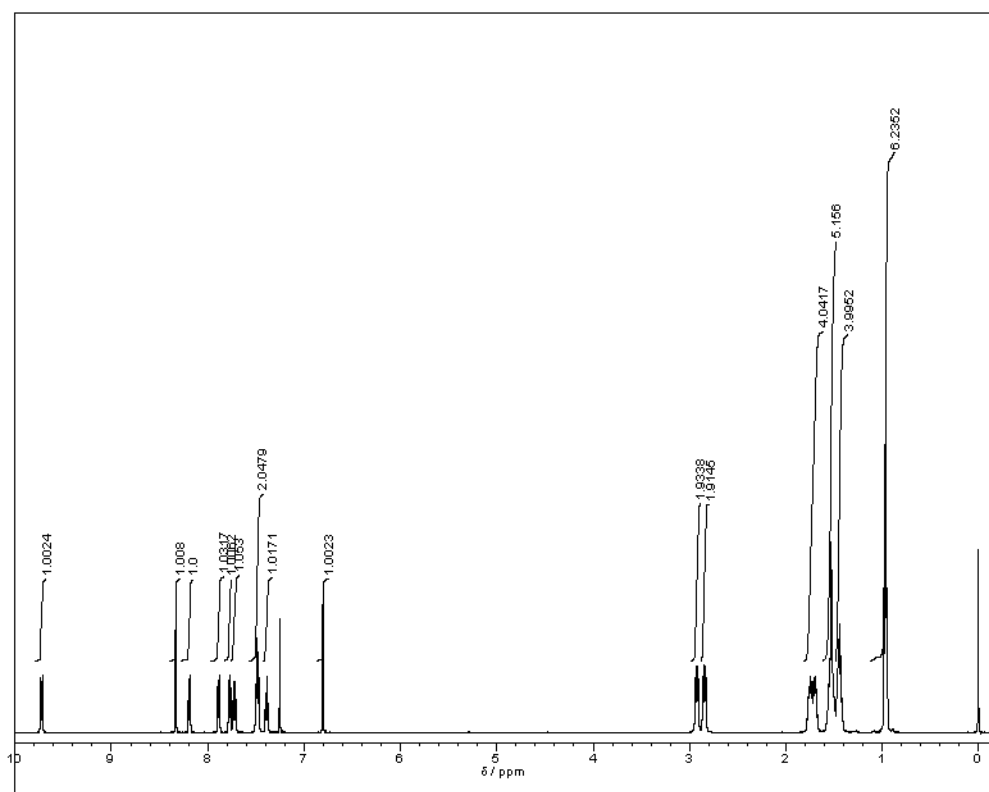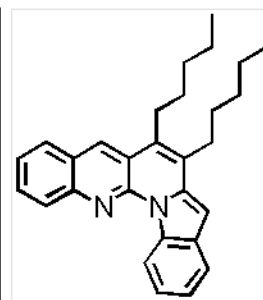

ObsNuc <sup>1</sup>H  
ObsFreq 500.0 MHz  
Solvent CDCl<sub>3</sub>

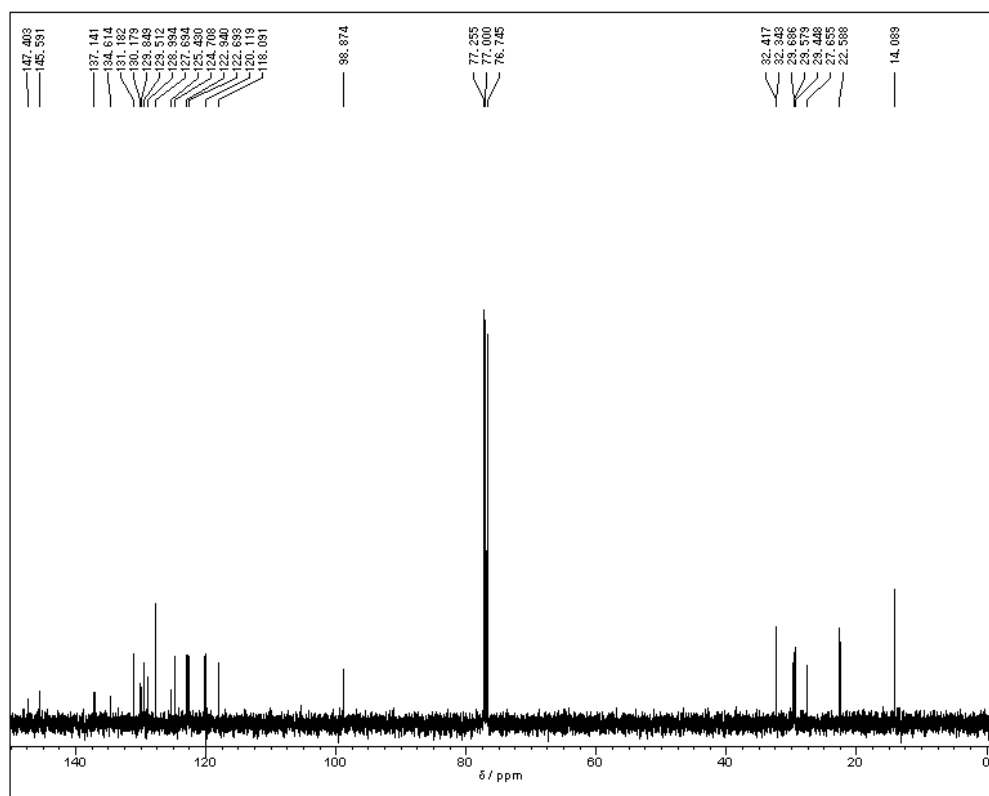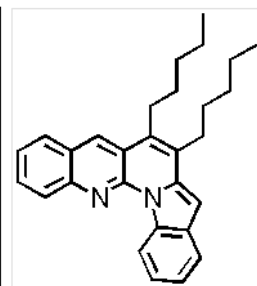

ObsNuc <sup>13</sup>C  
ObsFreq 125.65 MHz  
Solvent CDCl<sub>3</sub>

5a

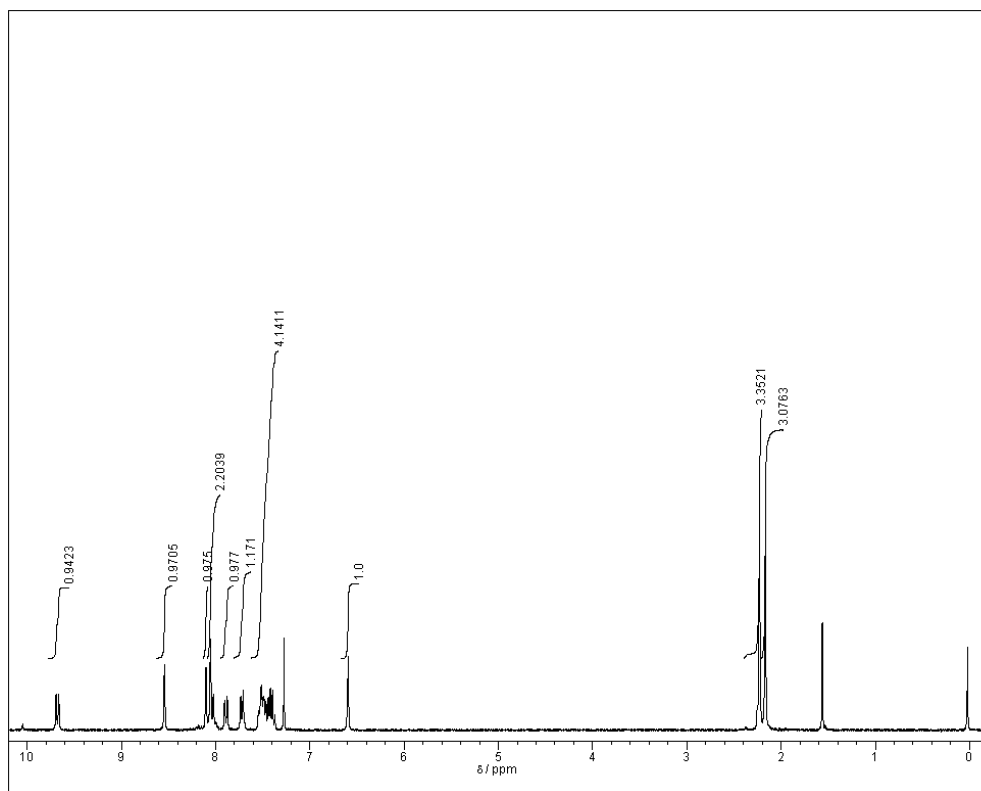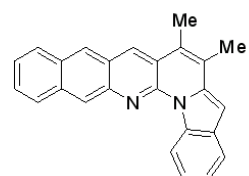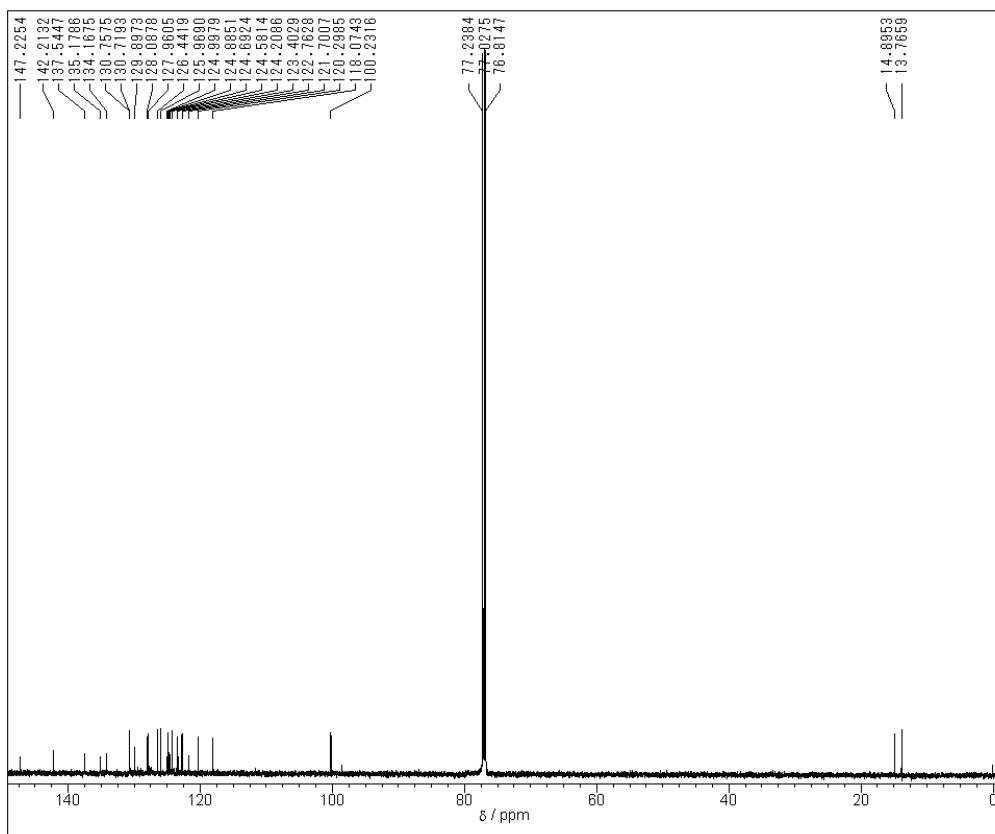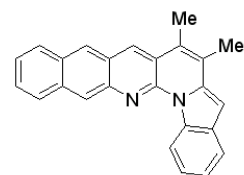

6a

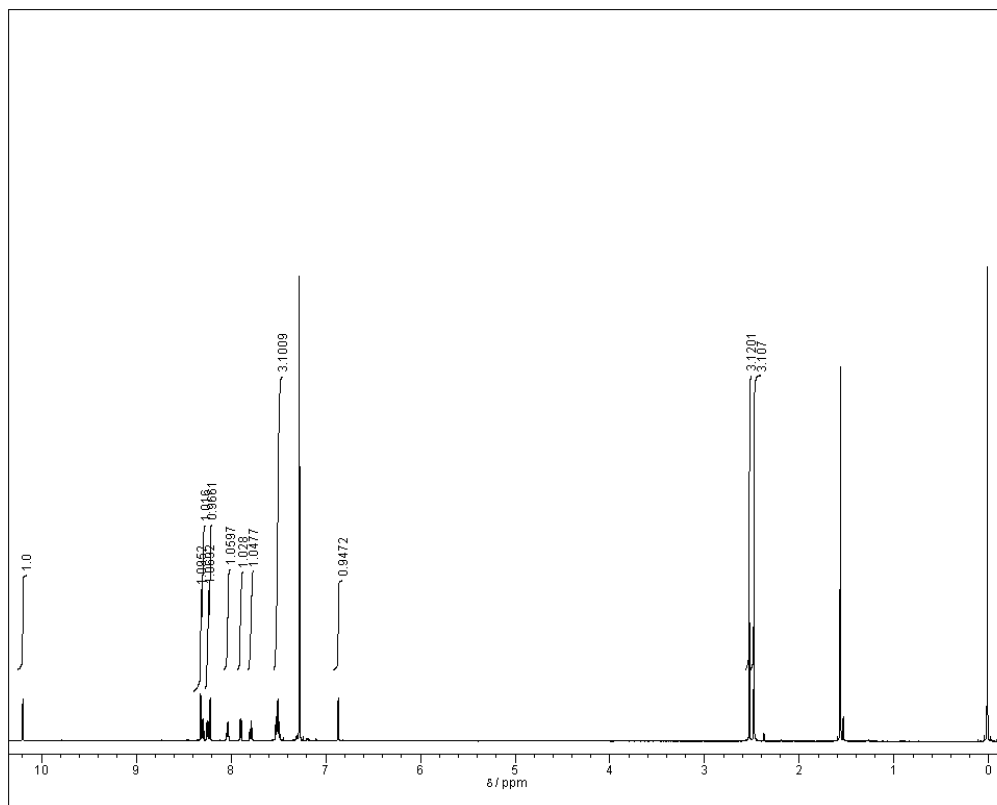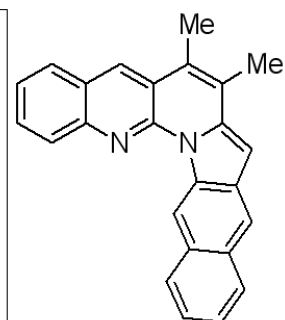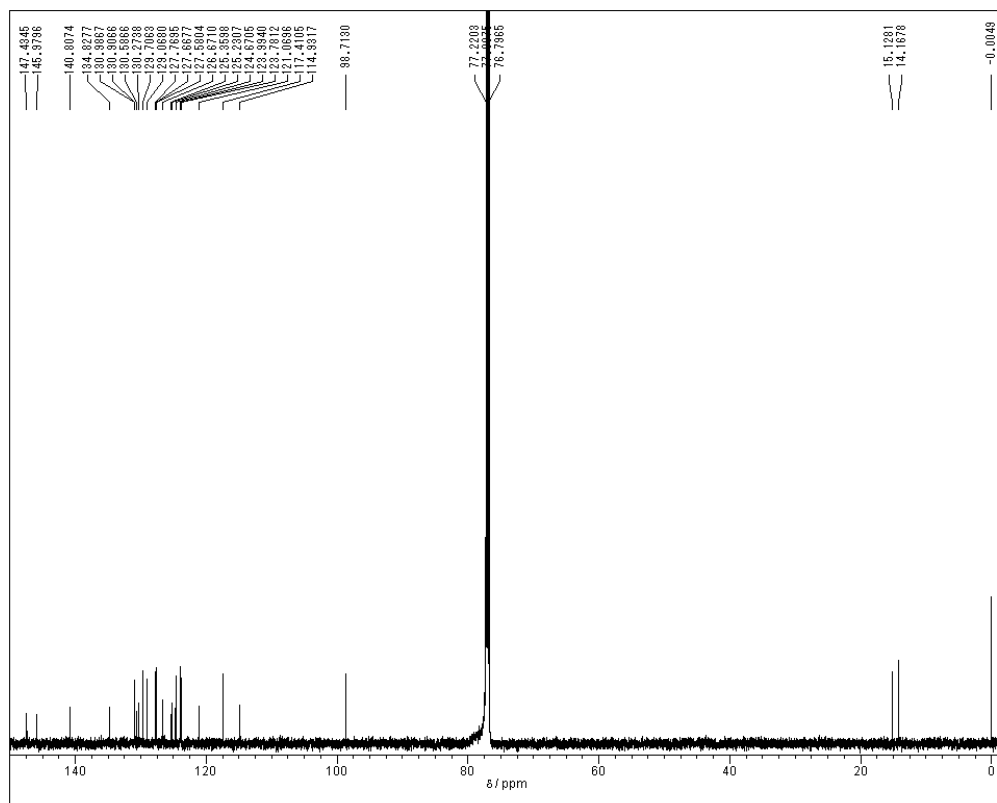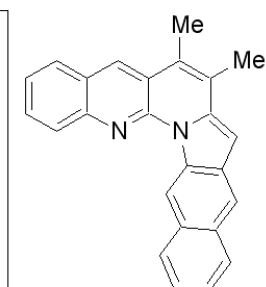



5b

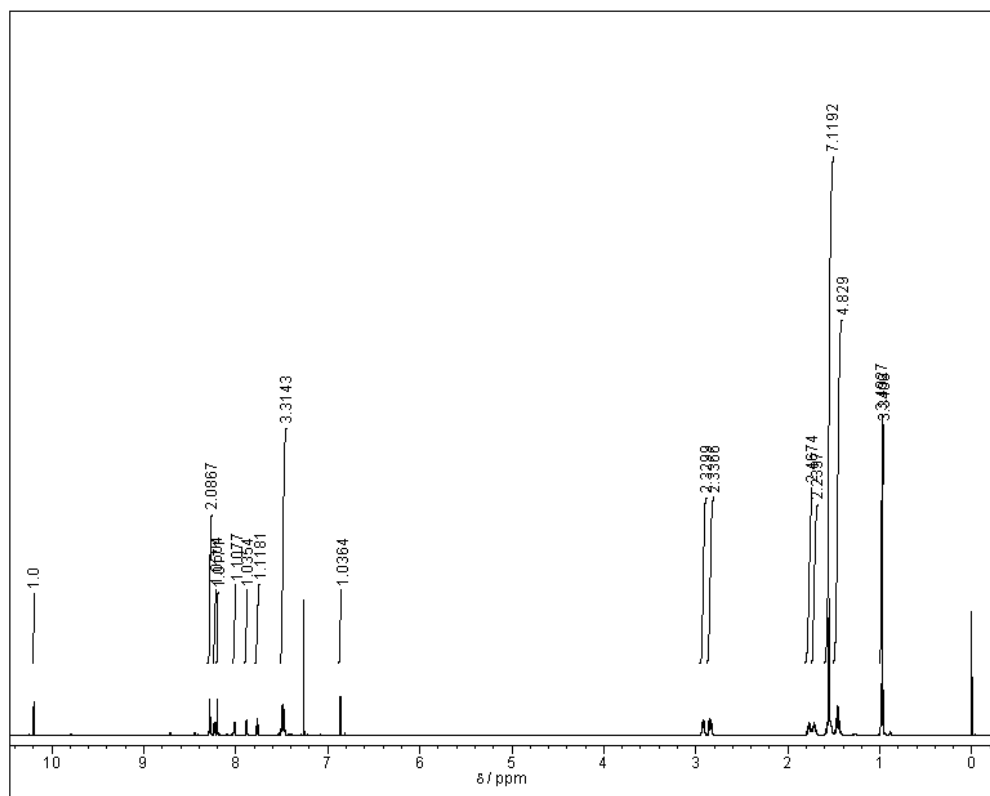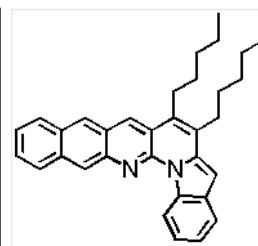

ObsNuc <sup>1</sup>H  
ObsFreq 600.13 MHz  
Solvent CDCl<sub>3</sub>

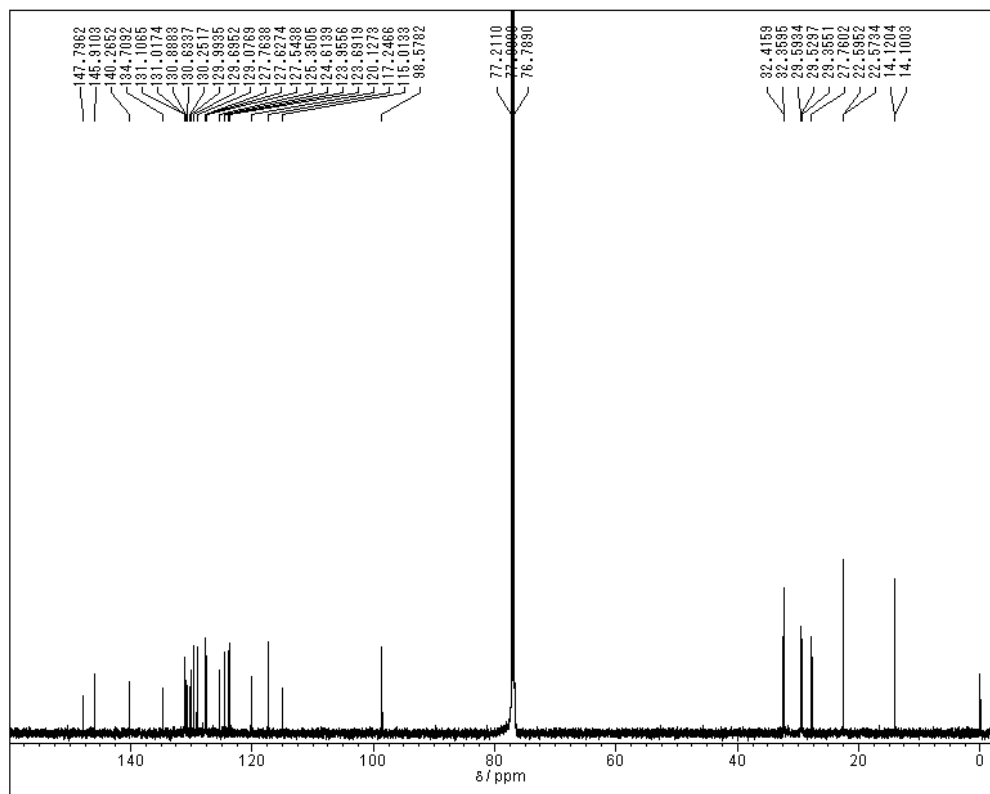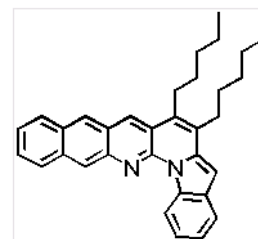

ObsNuc <sup>13</sup>C  
ObsFreq 150.9 MHz  
Solvent CDCl<sub>3</sub>

6b

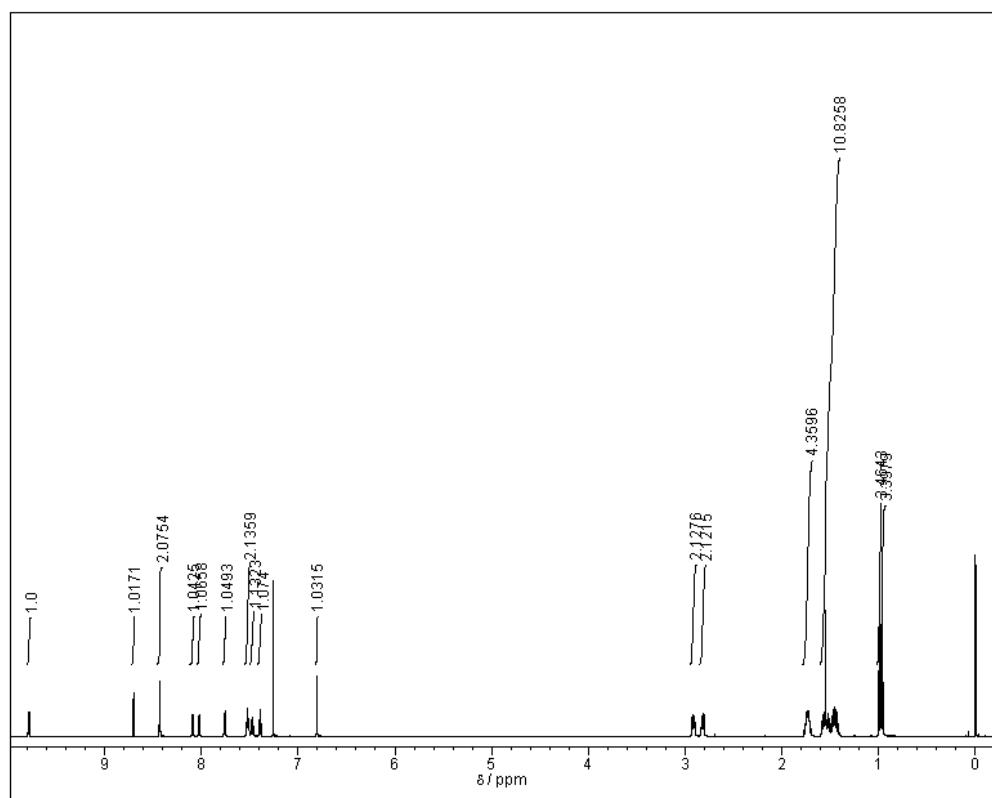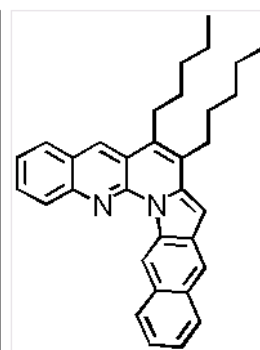

ObsNuc <sup>1</sup>H  
ObsFreq 800.13 MHz  
Solvent CDCl<sub>3</sub>

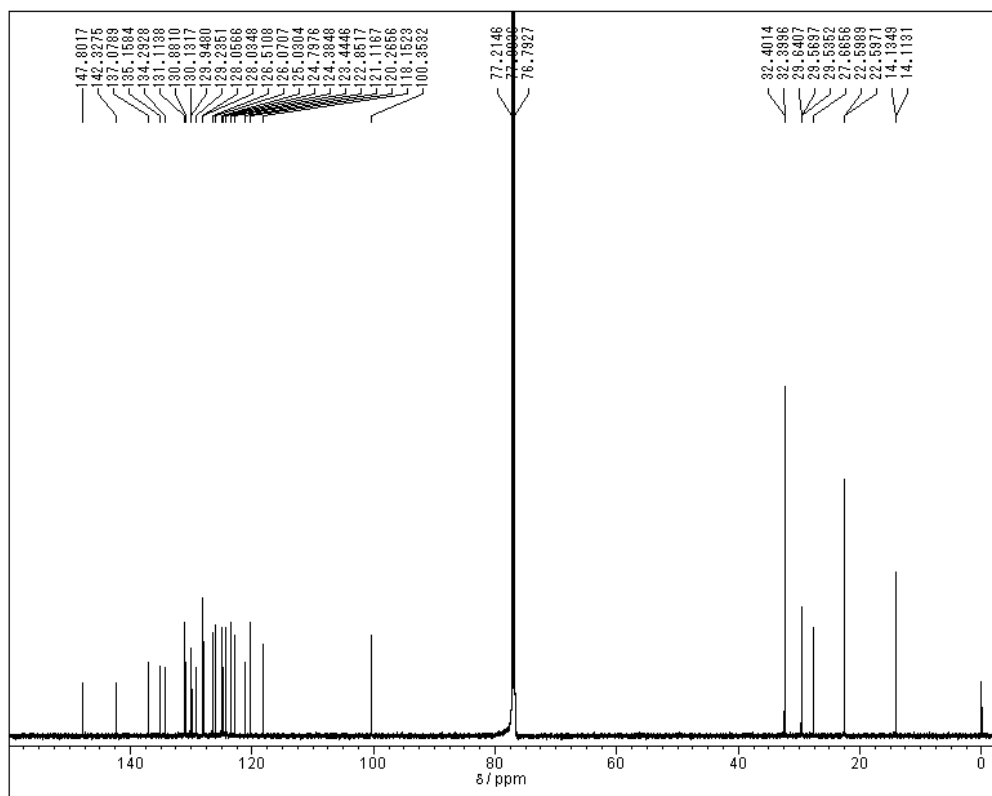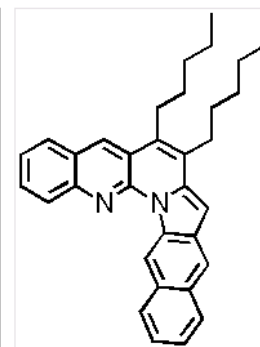

ObsNuc <sup>13</sup>C  
ObsFreq 150.9 MHz  
Solvent CDCl<sub>3</sub>

7a

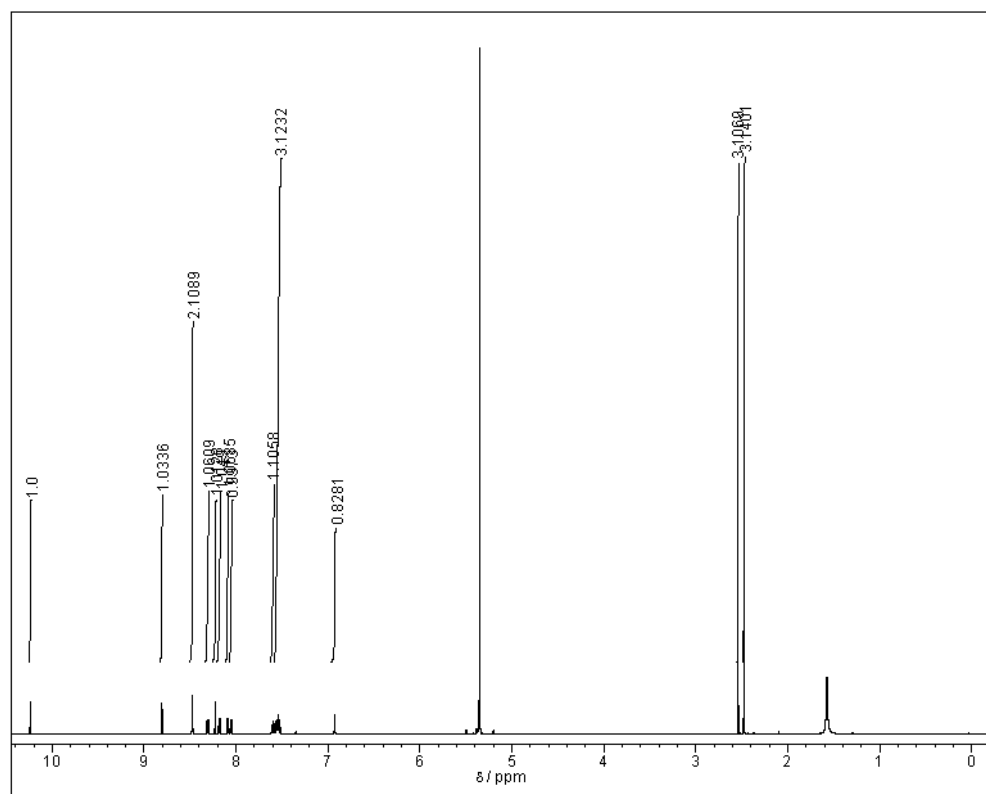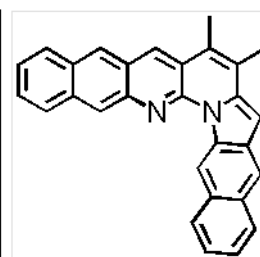

ObsNuc <sup>1</sup>H  
ObsFreq 600.13 MHz  
Solvent CD<sub>2</sub>Cl<sub>2</sub>

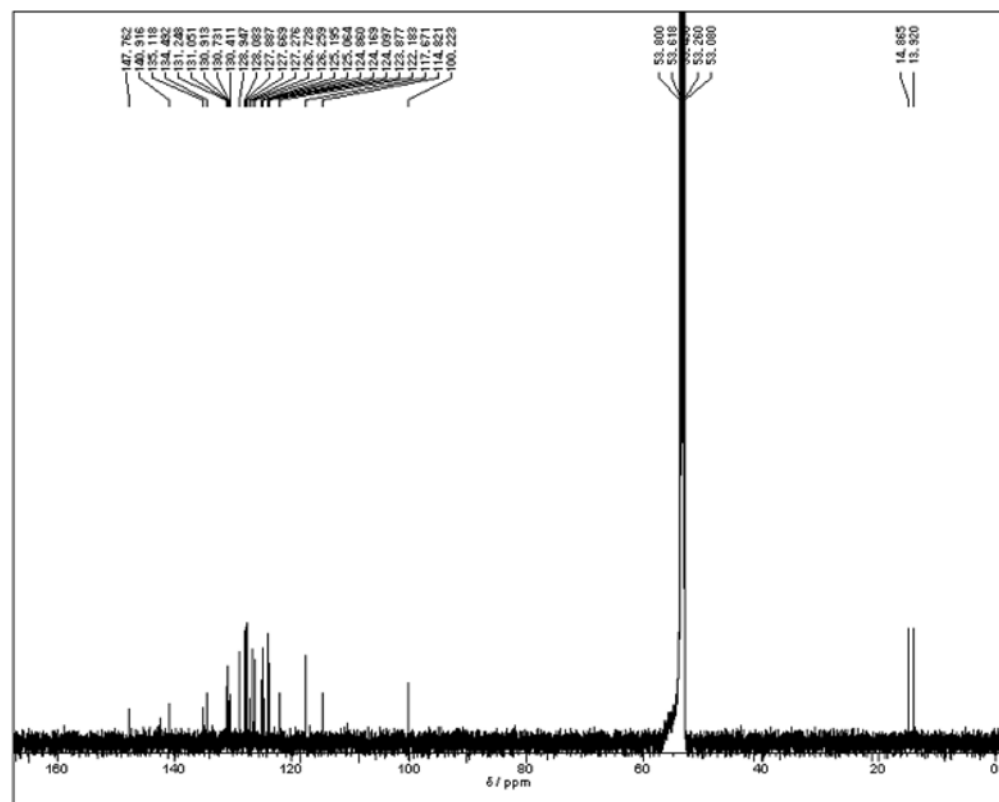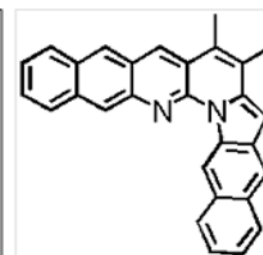

ObsNuc <sup>13</sup>C  
ObsFreq 150.9 MHz  
Solvent CD<sub>2</sub>Cl<sub>2</sub>

7b

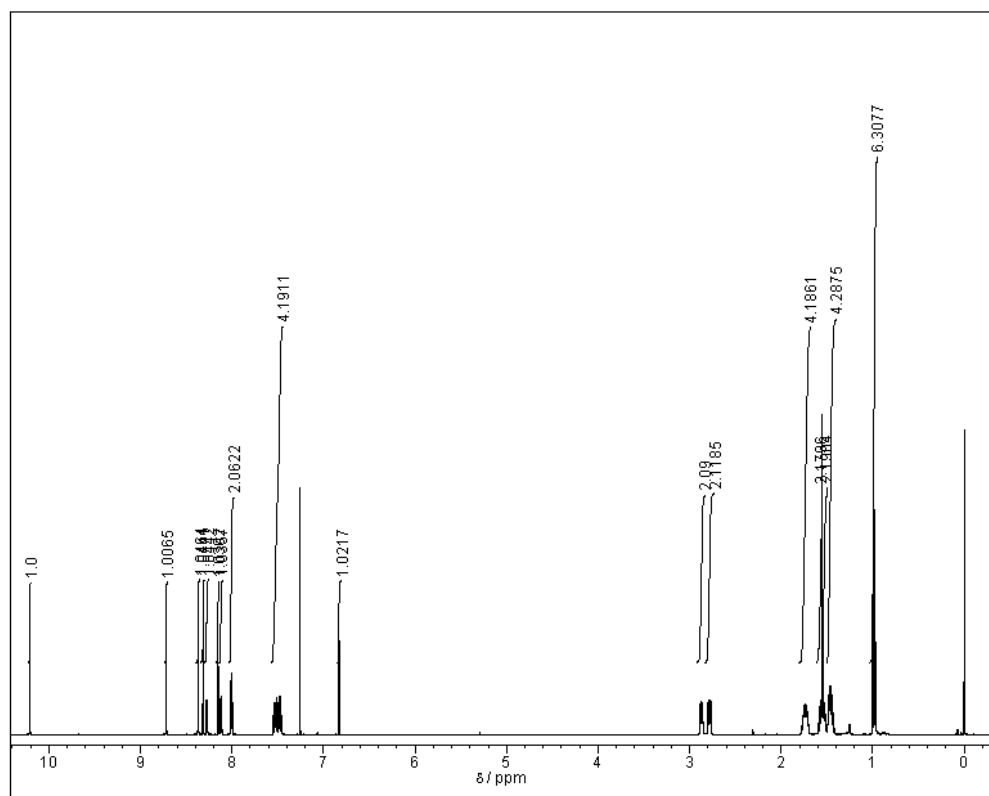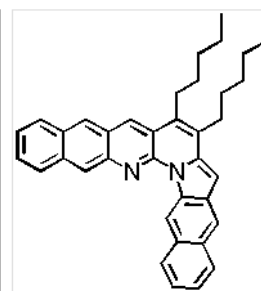

ObsMuc <sup>1</sup>H  
ObsFreq 600.13 MHz  
Solvent CDCl<sub>3</sub>

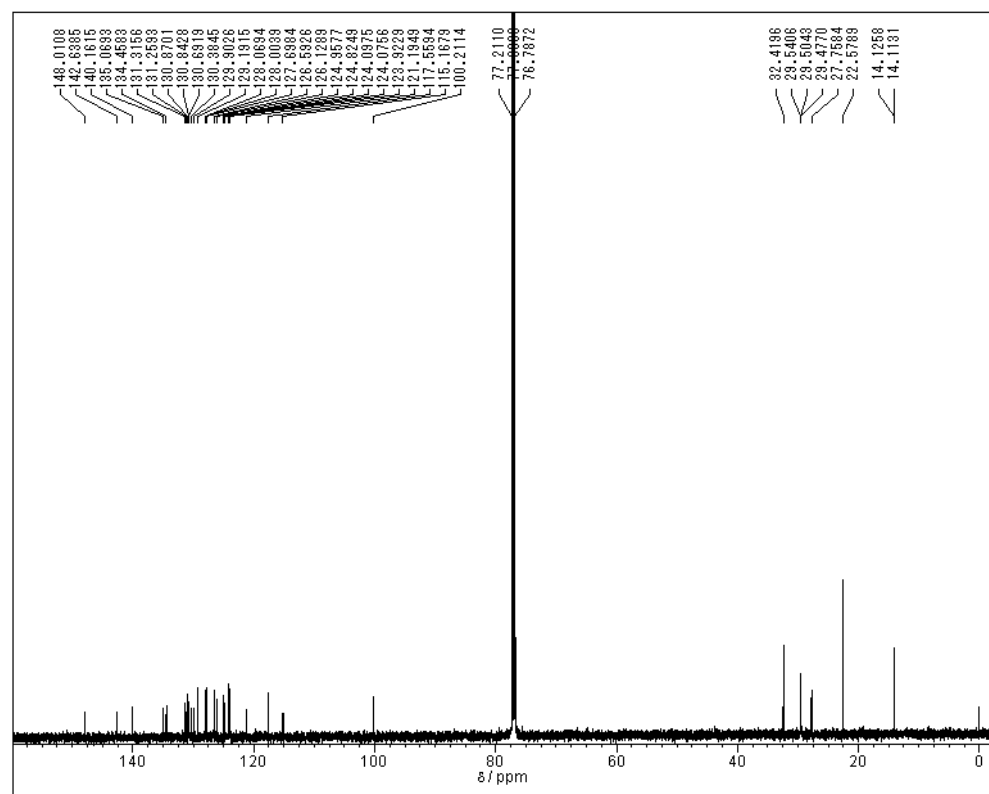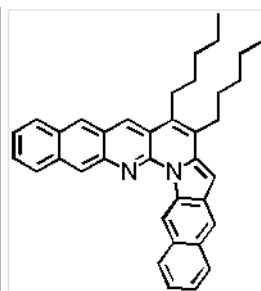

ObsMuc <sup>13</sup>C  
ObsFreq 150.9 MHz  
Solvent CDCl<sub>3</sub>

### 3. X-ray Crystallographic Analysis

#### 3.1 Measurements

Crystallographic data of **5a** is summarized in Table S1. X-ray quality single crystals of **5a** were obtained from a hexane–dichloromethane solution as brownish red blocks. Single crystals of **5a** were coated with oil (Immersion Oil, type B: Code 1248, Cargille Laboratories, Inc.) and mounted on a MicroMount™ (MiTeGen, LLC). Diffraction data of **5a** were collected at 113 K under a cold nitrogen gas stream on a Rigaku AFC10 diffractometer equipped with a Saturn724+ CCD detector using graphite-monochromated MoK $\alpha$  radiation ( $\lambda = 0.71073$  Å). The intensity data were collected by an  $\omega$ -scan method with 0.5° oscillation for each frame. Bragg spots were integrated using the CrystalClear program package,<sup>S3</sup> and the empirical absorption corrections (multi-scan) were applied using the REQAB program. The structures were solved by a direct method (SIR97),<sup>S4</sup> and refined by a full-matrix least squares (SHELXL-97).<sup>S5</sup> Anisotropic temperature factors were applied to all non-hydrogen atoms. The hydrogen atoms were put at calculated positions, and refined applying riding models.

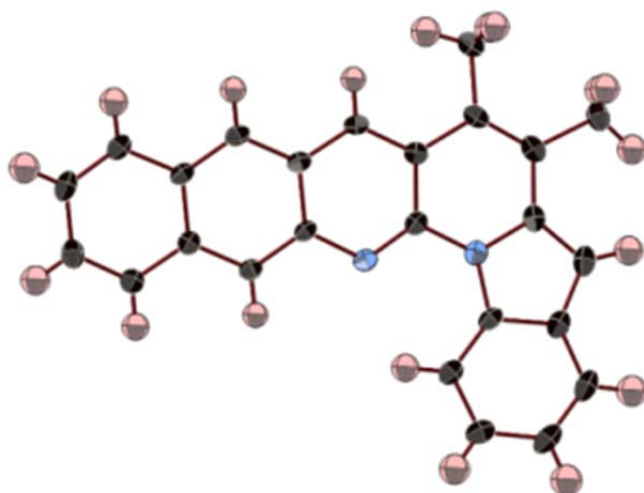

**Figure S1.** Molecular structure of **5a**. One of the two crystallographically independent molecules is shown.

<sup>S3</sup> CrystalClear: Rigaku/MSK. Inc., 9009 New Trails Drive, The Woodlands TX 77381, USA (2005).

<sup>S4</sup> A. Altomare, M. C. Burla, M. Camalli, G. L. Cascarano, C. Giacovazzo, A. Guagliardi, A. G. G. Moliterni, G. Polidori and R. J. Spagna, *Appl. Cryst.*, 1999, **32**, 115–119.

<sup>S5</sup> G. M. Sheldrick, *Acta Crystallogr. Sect. A*, 2008, **64**, 112–122.

**Table S1.** Crystallographic Data for **5a**.

---

|                                                      |                                                |
|------------------------------------------------------|------------------------------------------------|
| formula                                              | C <sub>25</sub> H <sub>18</sub> N <sub>2</sub> |
| <i>M</i>                                             | 346.41                                         |
| <i>T</i> / K                                         | 113                                            |
| color                                                | brownish red                                   |
| size, mm                                             | 0.20 x 0.15 x 0.05                             |
| crystal system                                       | triclinic                                      |
| space group                                          | <i>P</i> -1 (#2)                               |
| <i>a</i> / Å                                         | 8.4955(15)                                     |
| <i>b</i> / Å                                         | 11.1198(19)                                    |
| <i>c</i> / Å                                         | 19.241(3)                                      |
| <i>α</i> / deg.                                      | 76.717(4)                                      |
| <i>β</i> / deg.                                      | 87.166(5)                                      |
| <i>γ</i> / deg.                                      | 83.238(5)                                      |
| <i>V</i> / Å <sup>3</sup>                            | 1756.3(5)                                      |
| <i>Z</i>                                             | 4                                              |
| <i>D</i> <sub>x</sub> / g cm <sup>-3</sup>           | 1.310                                          |
| reflections collected                                | 21415                                          |
| unique reflections                                   | 7983                                           |
| refined parameters                                   | 488                                            |
| GOF on <i>F</i> <sup>2</sup>                         | 1.093                                          |
| <i>R</i> 1 [ <i>I</i> > 2σ( <i>I</i> )] <sup>a</sup> | 0.0699                                         |
| <i>wR</i> 2 (all data) <sup>b</sup>                  | 0.1899                                         |
| Δρ <sub>min, max</sub> / e Å <sup>-3</sup>           | -0.56, 0.57                                    |

---

<sup>a</sup> *R*1 = Σ ||*F*<sub>o</sub>| - |*F*<sub>c</sub>|| / Σ |*F*<sub>o</sub>|, <sup>b</sup> *wR*2 = [Σ {*w*(*F*<sub>o</sub><sup>2</sup> - *F*<sub>c</sub><sup>2</sup>)<sup>2</sup> / Σ *w*(*F*<sub>o</sub><sup>2</sup>)<sup>2</sup>}]<sup>1/2</sup>

---

## 4. Photophysical Data

### 4.1 Measurements

UV-visible spectra of the L-shaped compounds were obtained on Shimadzu UV-3101(PC)S spectrometer. Fluorescence spectra were measured by JASCO FP-6500 spectrofluorometer. Absolute fluorescence quantum yields were measured by a calibrated integrating sphere system C10027 (Hamamatsu Photonics K.K.). Fluorescence lifetimes were measured with a Quantaaurus-Tau<sup>®</sup> C1136703 (Hamamatsu Photonics K.K.).

### 4.2 Photophysical Properties of 4b–7b

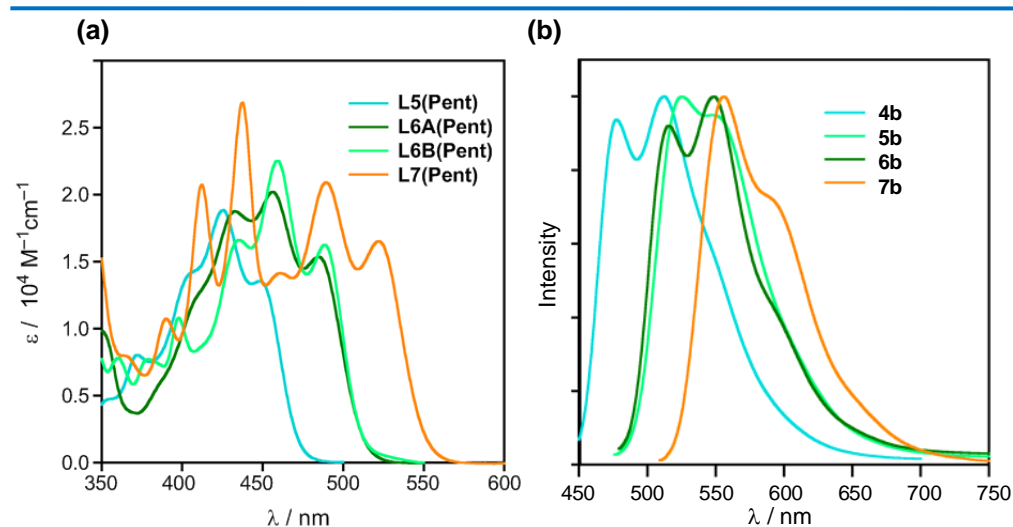

**Figure S2.** (a) UV-vis spectra of **4b–7b** in CH<sub>2</sub>Cl<sub>2</sub>. (b) Fluorescence spectra (excited at  $\lambda_{\text{max}}$  (abs)) of **4b–7b** in CH<sub>2</sub>Cl<sub>2</sub>.

**Table S2. Photophysical Properties of 4b–7b<sup>a</sup>**

| Compound  | $\lambda_{\text{max}}$ (abs) [nm] ( $\epsilon$ [ $10^4 \text{ cm}^{-1} \text{ M}^{-1}$ ]) | $\lambda_{\text{max}}$ (em) [nm] <sup>b</sup> | $\Phi_{\text{F}}$ <sup>b</sup> | $\tau_{\text{s}}$ [ns] <sup>b</sup> |
|-----------|-------------------------------------------------------------------------------------------|-----------------------------------------------|--------------------------------|-------------------------------------|
| <b>4b</b> | 448 (1.35), 425 (1.88), 406 (1.42)                                                        | 477, 512                                      | 0.82                           | 5.78                                |
| <b>5b</b> | 485 (1.54), 456 (2.02), 433 (1.87)                                                        | 525, 547                                      | 0.74                           | 6.26                                |
| <b>6b</b> | 488 (1.62), 459 (2.25), 435 (1.66)                                                        | 516, 549                                      | 0.77                           | 6.29                                |
| <b>7b</b> | 522 (1.65), 489 (2.09), 437 (2.68)                                                        | 556, 585 (sh)                                 | 0.64                           | 6.31                                |

<sup>a</sup> In CH<sub>2</sub>Cl<sub>2</sub>. <sup>b</sup> Excitation at  $\lambda_{\text{max}}$ (abs).

### 4.3 Absorption and Emission Spectra of 4–7

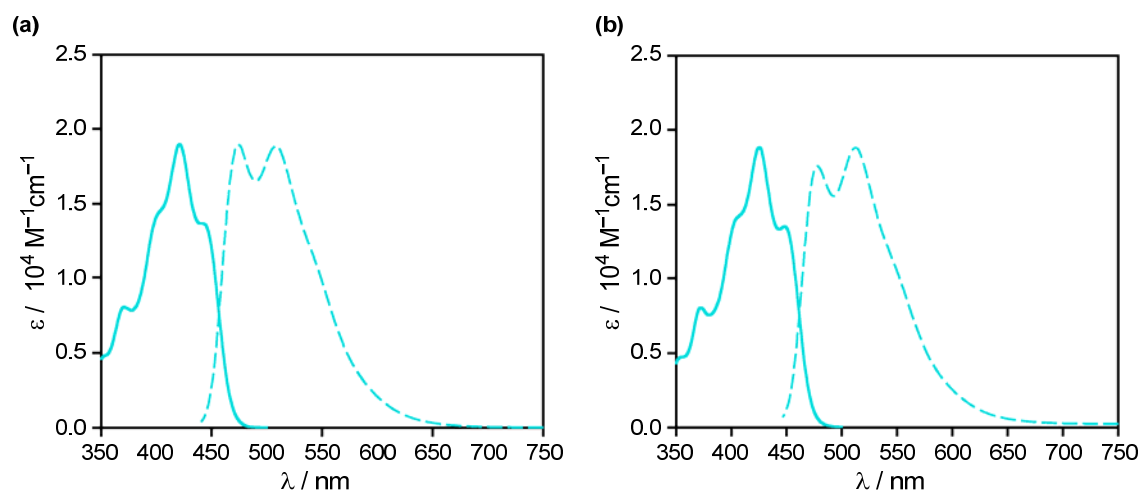

**Figure S3.** UV-vis spectra (solid line) and fluorescence spectra (dashed line) of **4a** (a) and **4b** (b) in  $\text{CH}_2\text{Cl}_2$ .

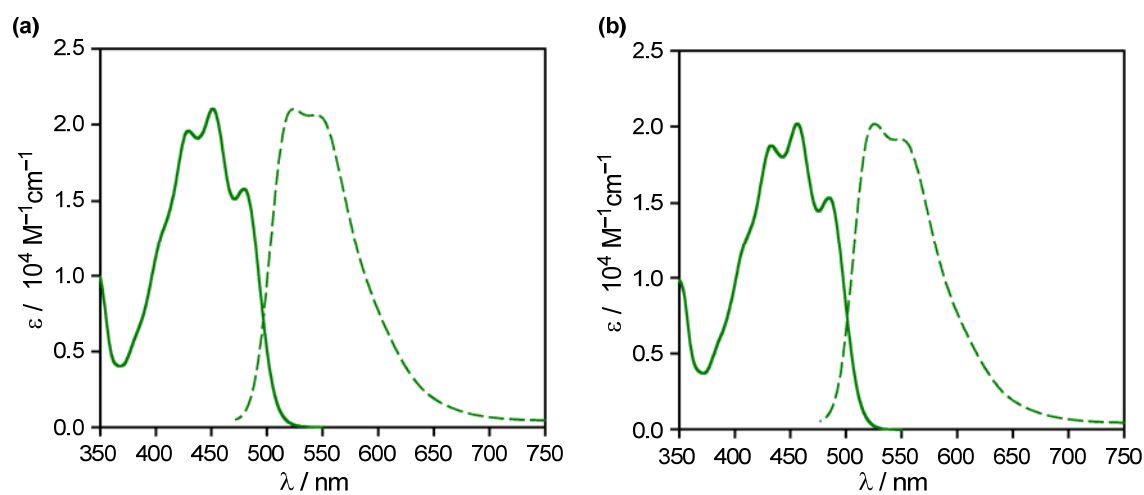

**Figure S4.** UV-vis spectra (solid line) and fluorescence spectra (dashed line) of **5a** (a) and **5b** (b) in  $\text{CH}_2\text{Cl}_2$ .



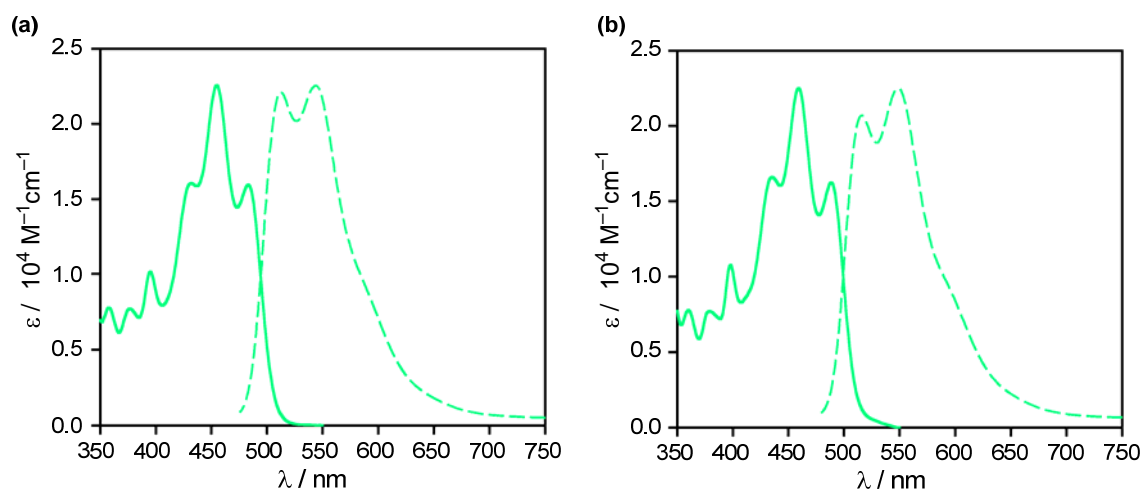

**Figure S5.** UV-vis spectra (solid line) and fluorescence spectra (dashed line) of **6a** (a) and **6b** (b) in  $\text{CH}_2\text{Cl}_2$ .

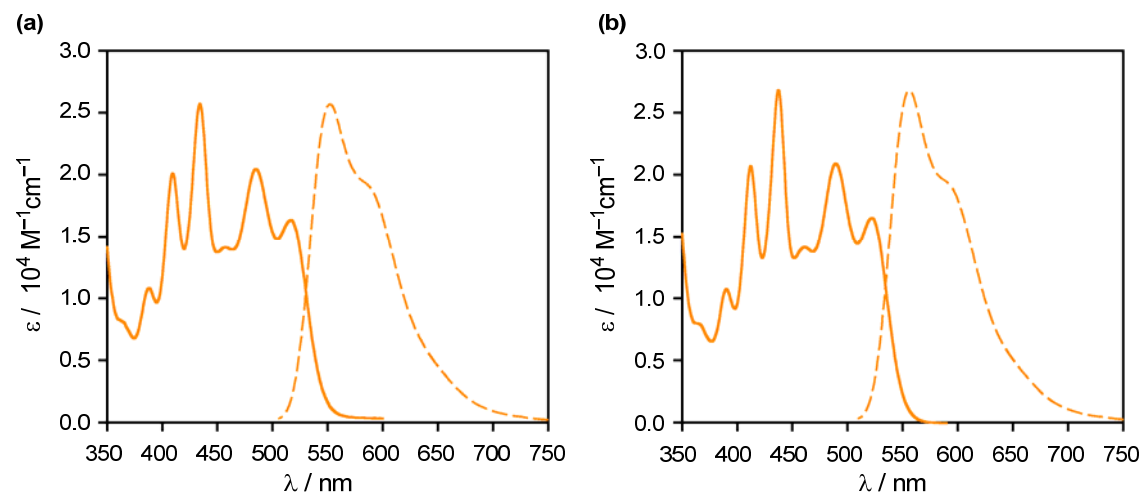

**Figure S6.** UV-vis spectra (solid line) and fluorescence spectra (dashed line) of **7a** (a) and **7b** (b) in  $\text{CH}_2\text{Cl}_2$ .

#### 4.4 Solvent-dependent Photophysical Properties of 4b

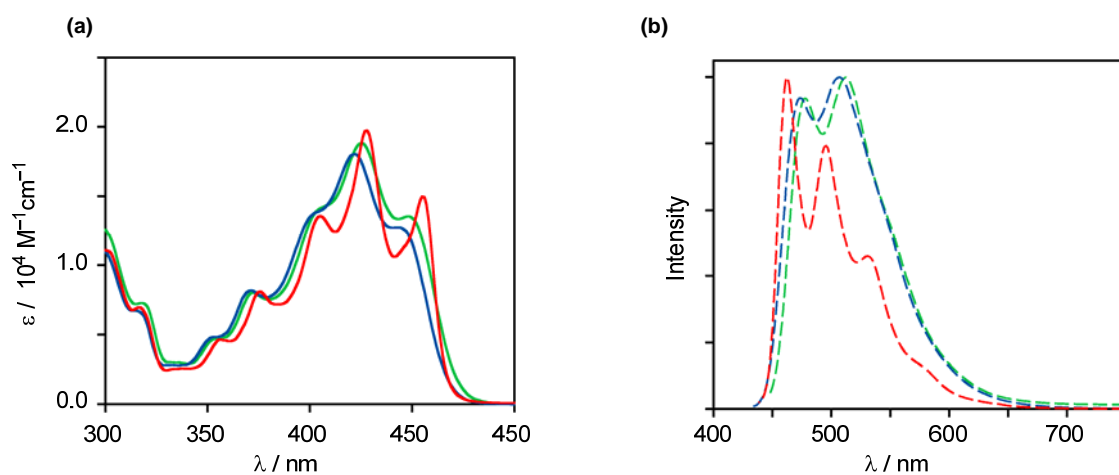

**Figure S7.** UV-vis spectra (a) and fluorescence spectra (b) of **4b** in methanol (blue), in dichloromethane (green), and in hexane (red).

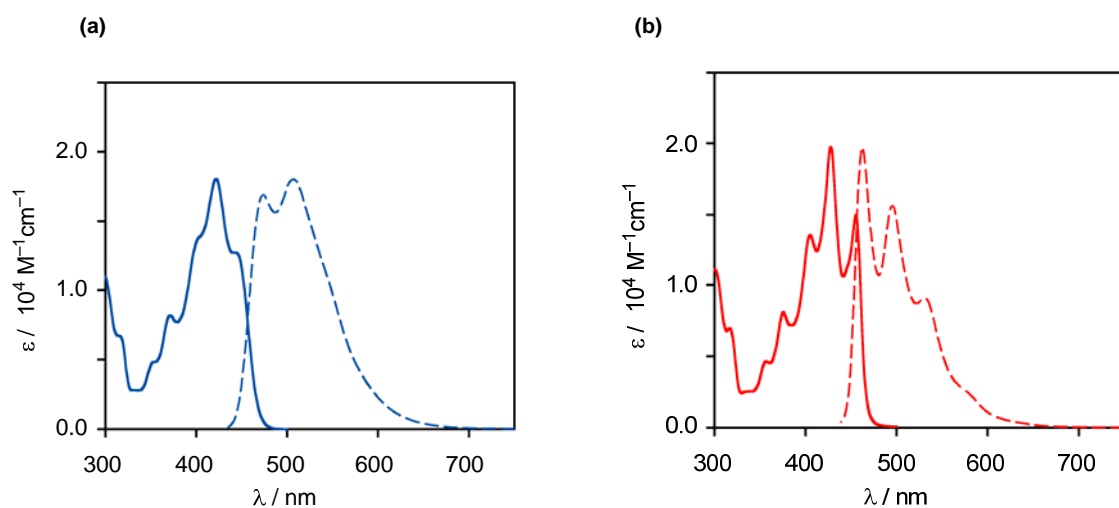

**Figure S8.** UV-vis spectra (solid line) and fluorescence spectra (dashed line) of **4b** in methanol (a) and in hexane (b). (For the spectra in  $\text{CH}_2\text{Cl}_2$ , see **Figure S2(b)**)

## 5. Cyclic Voltammetry

### 5.1 Measurements

Electrochemical experiments of L-shaped compounds were carried out with an ALS/CHI 624C electrochemical analyzer using a glassy carbon working electrode, a Pt wire counter electrode, and a Ag/AgNO<sub>3</sub> reference electrode ([AgNO<sub>3</sub>] = 0.01 mM in 0.1 M TBAClO<sub>4</sub>-CH<sub>3</sub>CN). The measurements were carried out in dry CH<sub>2</sub>Cl<sub>2</sub> or THF solution containing 0.1 M TBAPF<sub>6</sub> a supporting electrolyte with scan rate of 100 mVs<sup>-1</sup> in a glove box filled with argon at ambient temperature. The reported value is corrected to the ferrocene couple as an internal standard.

### 5.2 Electrochemical Properties of L-Shaped Compounds

**Table S3. Electrochemical properties of 4-7.**

| Compound  | $E^{\text{ox}}$ [V vs. Fc <sup>+</sup> /Fc] <sup>a</sup> | $E_{1/2}^{\text{red}}$ [V vs. Fc <sup>+</sup> /Fc] <sup>b,c</sup> |
|-----------|----------------------------------------------------------|-------------------------------------------------------------------|
| <b>4a</b> | 0.40                                                     | -2.40                                                             |
| <b>4b</b> | 0.48                                                     | -2.36                                                             |
| <b>5a</b> | 0.52                                                     | -2.10                                                             |
| <b>5b</b> | 0.51                                                     | -2.11                                                             |
| <b>6a</b> | 0.32                                                     | -2.30                                                             |
| <b>6b</b> | 0.31                                                     | -2.27                                                             |
| <b>7a</b> | 0.32                                                     | -2.04                                                             |
| <b>7b</b> | 0.37                                                     | -2.13                                                             |

<sup>a</sup> In CH<sub>2</sub>Cl<sub>2</sub>. <sup>b</sup> In THF. <sup>c</sup> Irreversible.

### 5.3 Cyclic Voltammograms

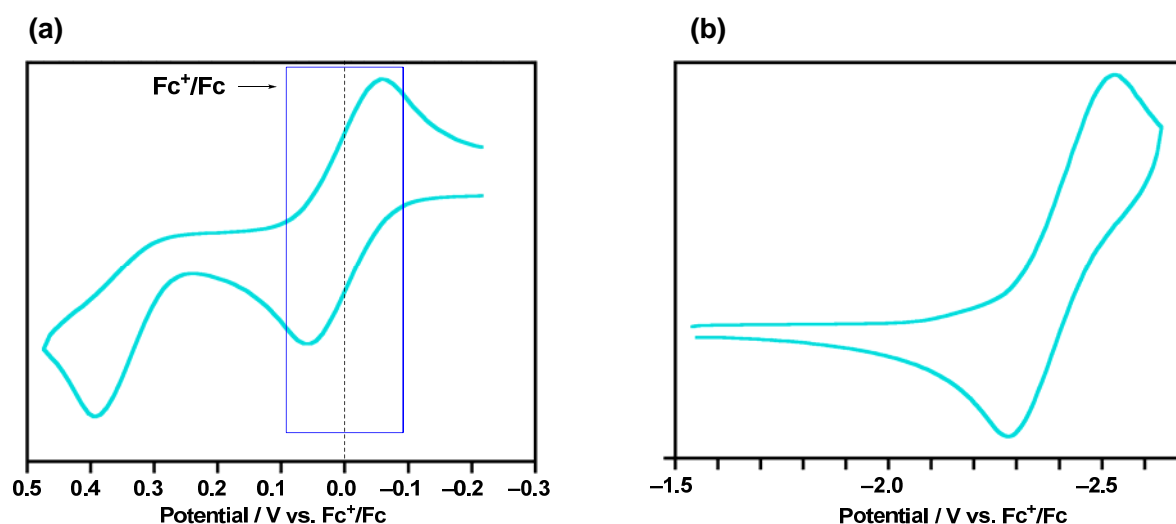

**Figure S9.** Cyclic voltammograms of **4a** in 0.1 M *n*-Bu<sub>4</sub>NPF<sub>6</sub>-dichloromethane with ferrocene (a) and in 0.1 M *n*-Bu<sub>4</sub>NPF<sub>6</sub>-THF (b).

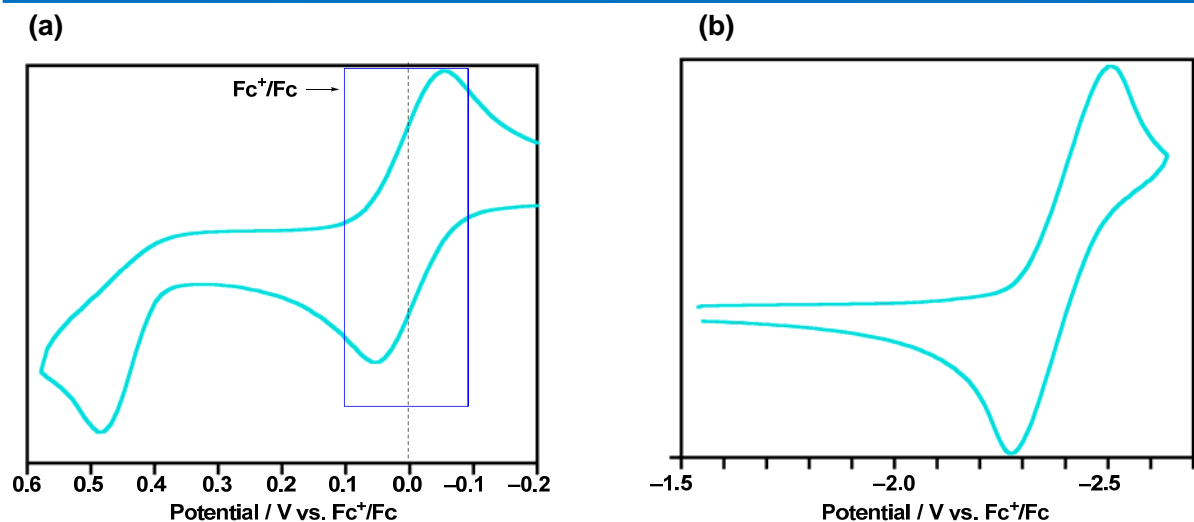

**Figure S10.** Cyclic voltammograms of **4b** in 0.1 M  $n\text{-Bu}_4\text{NPF}_6$ -dichloromethane with ferrocene (a) and in 0.1 M  $n\text{-Bu}_4\text{NPF}_6$ -THF (b).

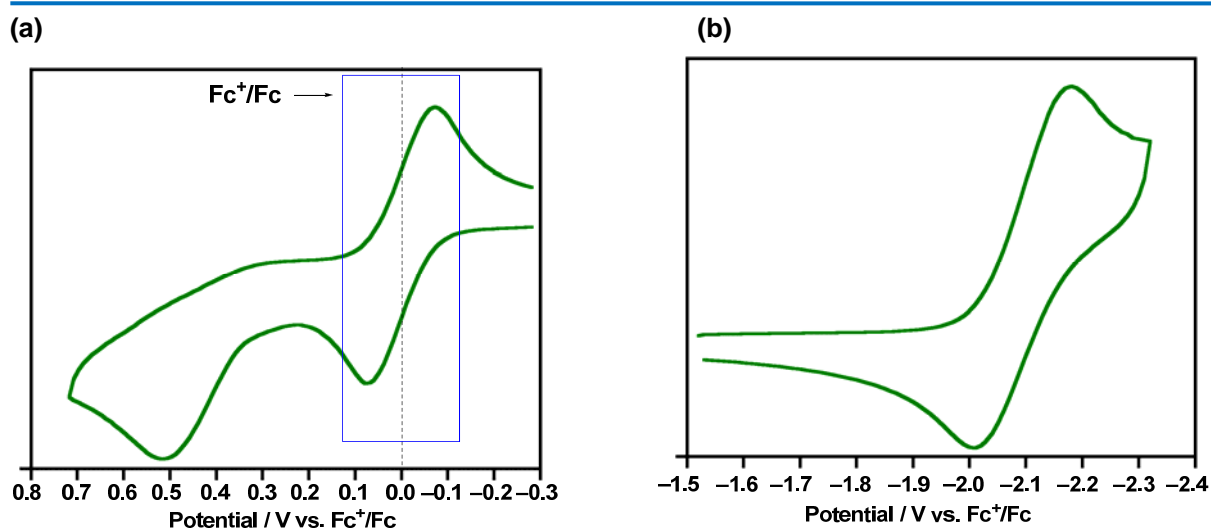

**Figure S11.** Cyclic voltammograms of **5a** in 0.1 M  $n\text{-Bu}_4\text{NPF}_6$ -dichloromethane with ferrocene (a) and in 0.1 M  $n\text{-Bu}_4\text{NPF}_6$ -THF (b).

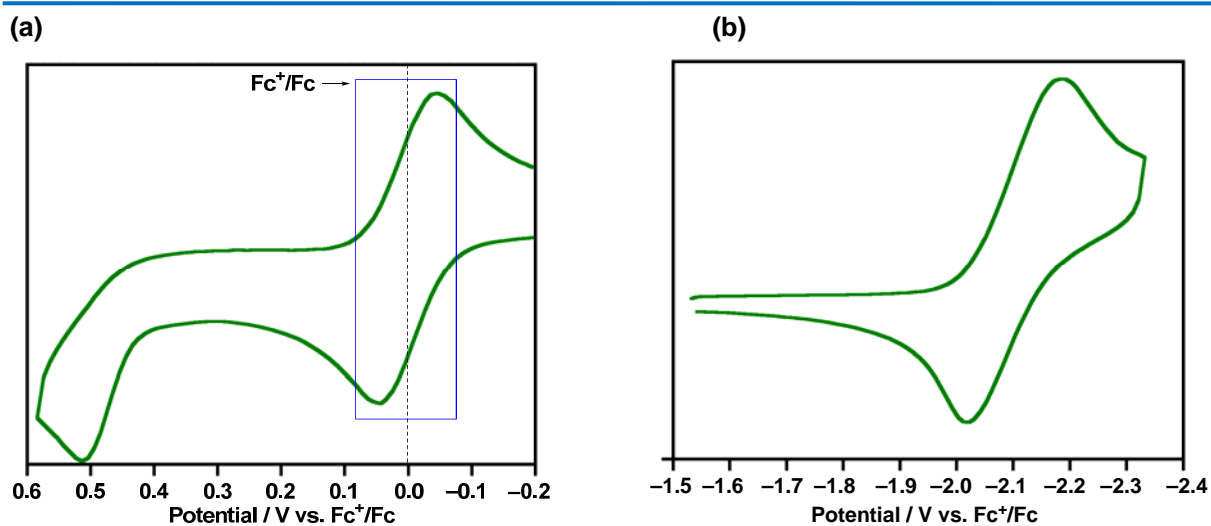

**Figure S12.** Cyclic voltammograms of **5b** in 0.1 M  $n\text{-Bu}_4\text{NPF}_6$ -dichloromethane with ferrocene (a) and in 0.1 M  $n\text{-Bu}_4\text{NPF}_6$ -THF (b).

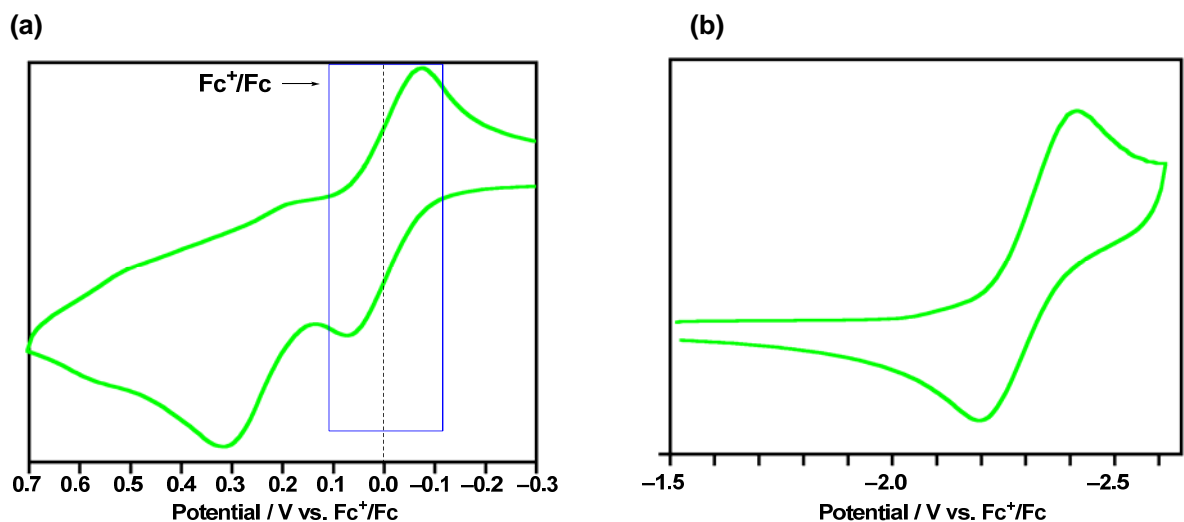

**Figure S13.** Cyclic voltammograms of **6a** in 0.1 M *n*-Bu<sub>4</sub>NPF<sub>6</sub>-dichloromethane with ferrocene (a) and in 0.1 M *n*-Bu<sub>4</sub>NPF<sub>6</sub>-THF (b).

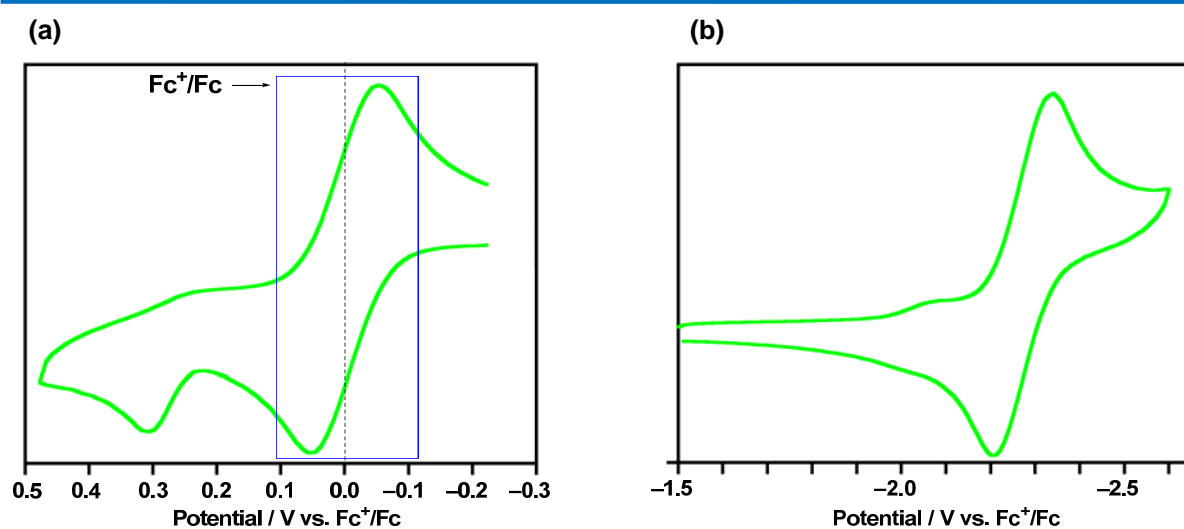

**Figure S14.** Cyclic voltammograms of **6b** in 0.1 M *n*-Bu<sub>4</sub>NPF<sub>6</sub>-dichloromethane with ferrocene (a) and in 0.1 M *n*-Bu<sub>4</sub>NPF<sub>6</sub>-THF (b).

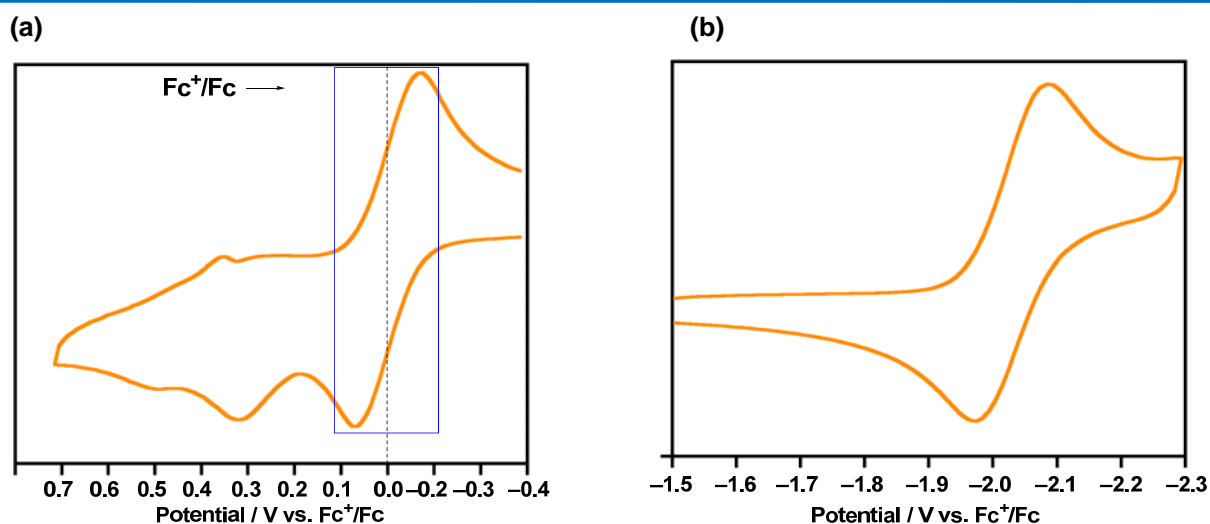

**Figure S15.** Cyclic voltammograms of **7a** in 0.1 M *n*-Bu<sub>4</sub>NPF<sub>6</sub>-dichloromethane with ferrocene (a) and in 0.1 M *n*-Bu<sub>4</sub>NPF<sub>6</sub>-THF (b).

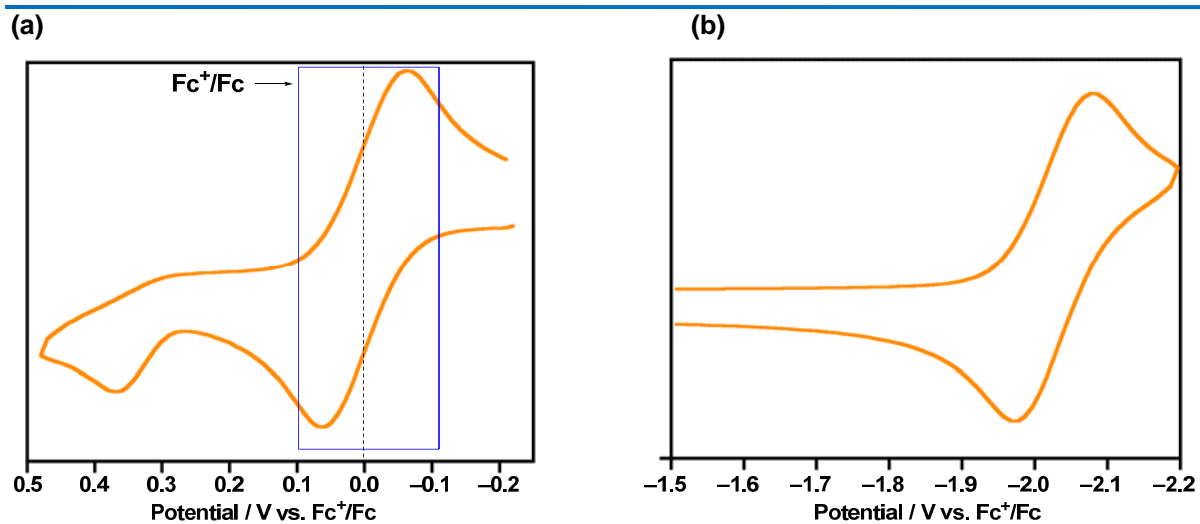

**Figure S16.** Cyclic voltammograms of **7b** in 0.1 M  $n\text{-Bu}_4\text{NPF}_6$ -dichloromethane with ferrocene (a) and in 0.1 M  $n\text{-Bu}_4\text{NPF}_6$ -THF (b).

## 6. Theoretical Calculations

### 6.1 Molecular Orbitals and Their Levels of L-Shaped Compounds

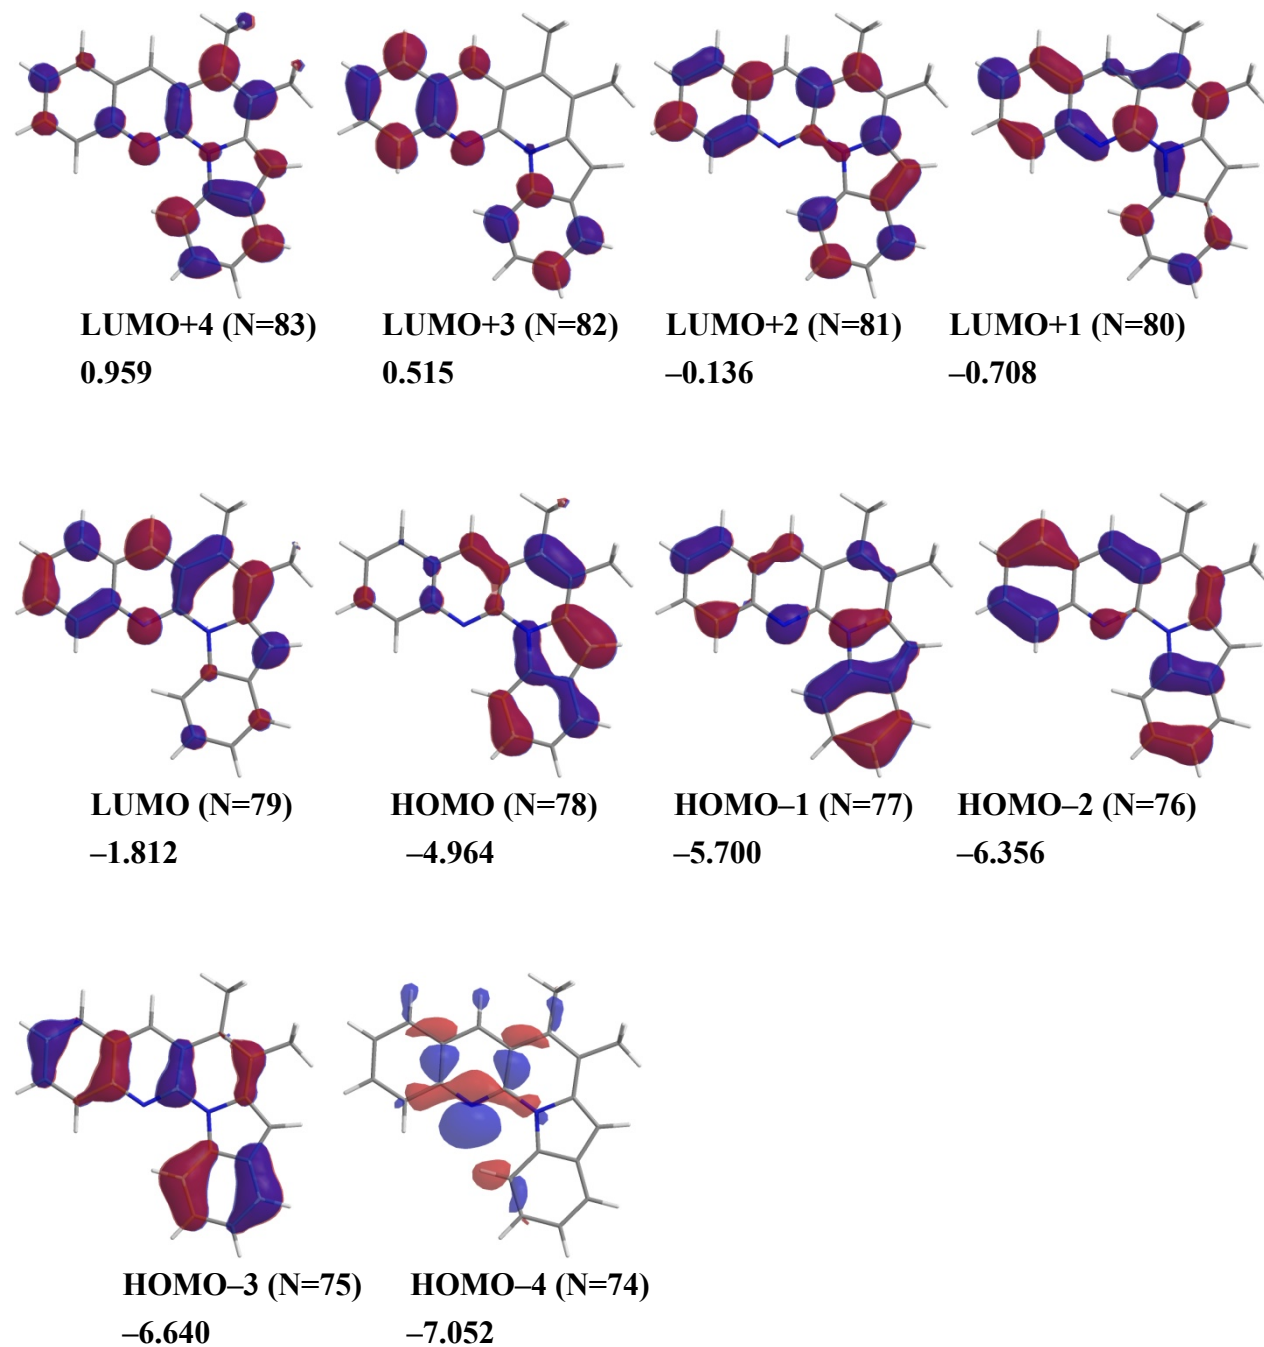

**Figure S17.** Selected molecular orbitals and their levels (eV) of 4a.

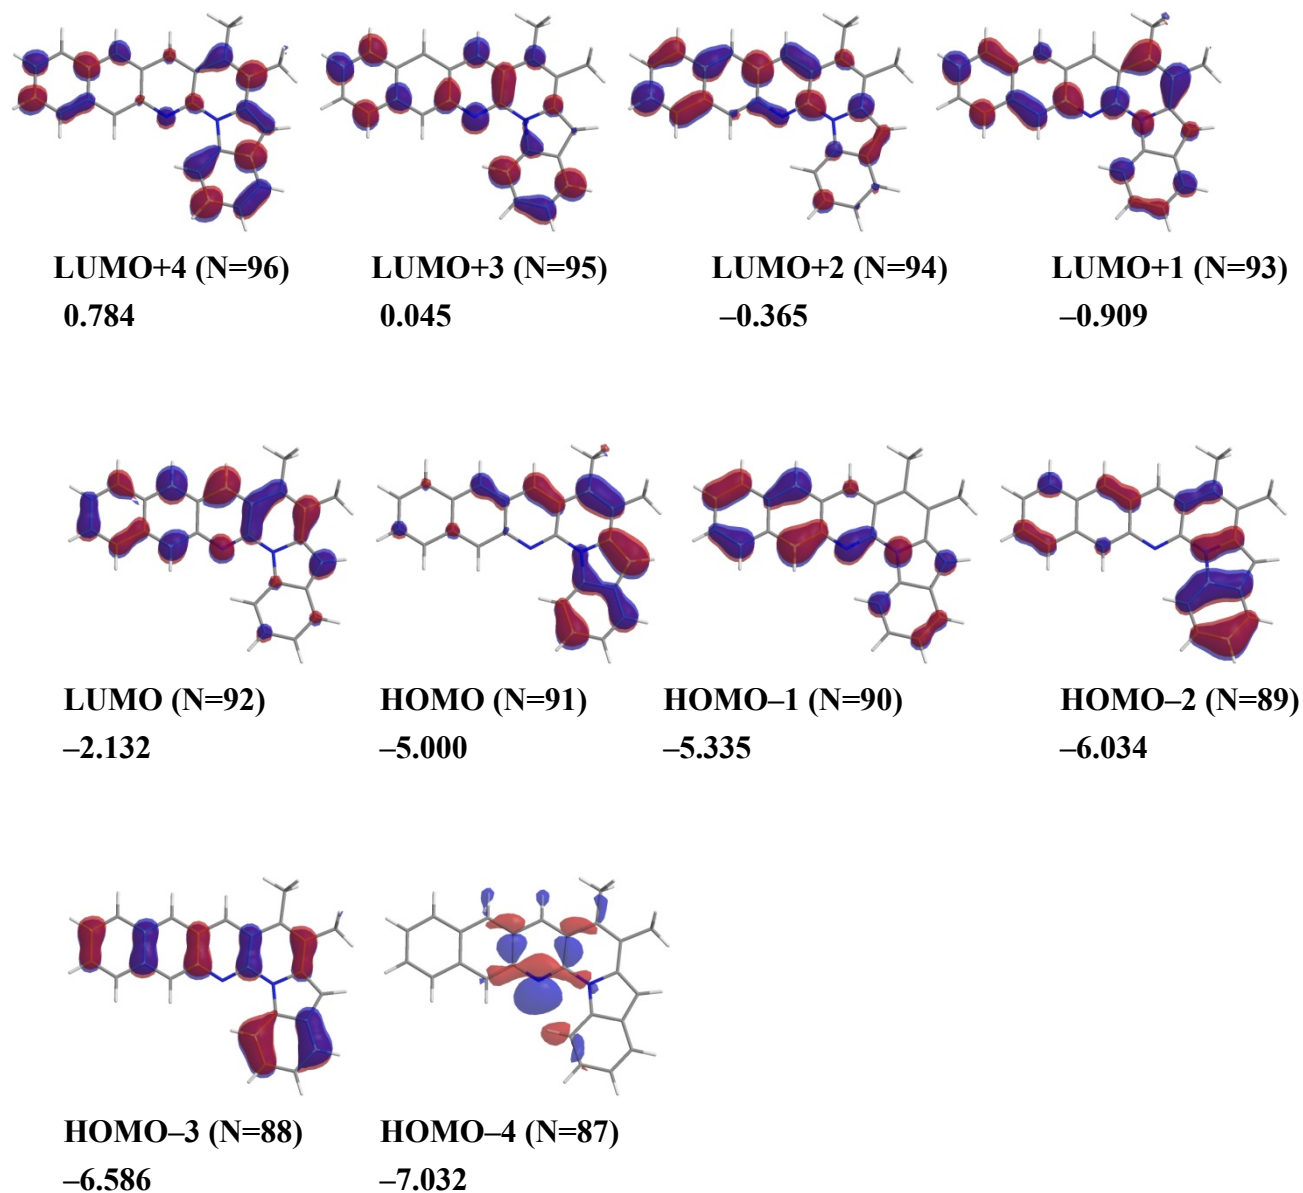

**Figure S18.** Selected molecular orbitals and their levels (eV) of **5a**.



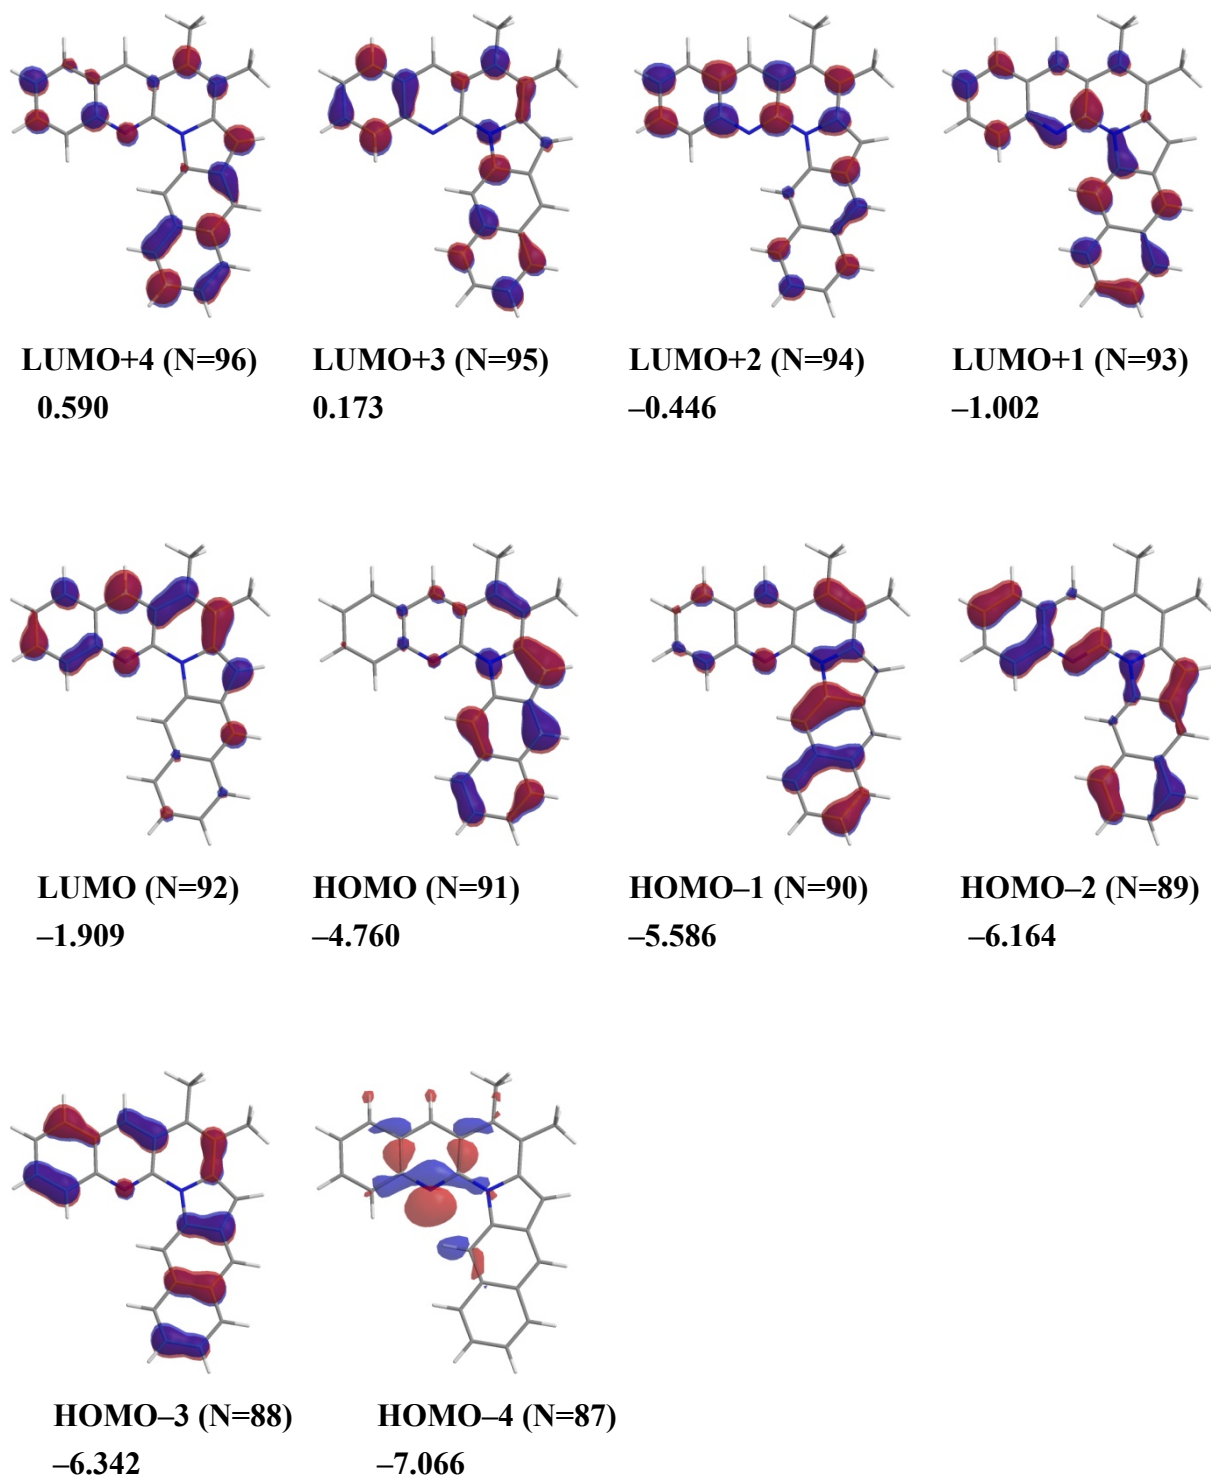

**Figure S19.** Selected molecular orbitals and their levels (eV) of 6a.

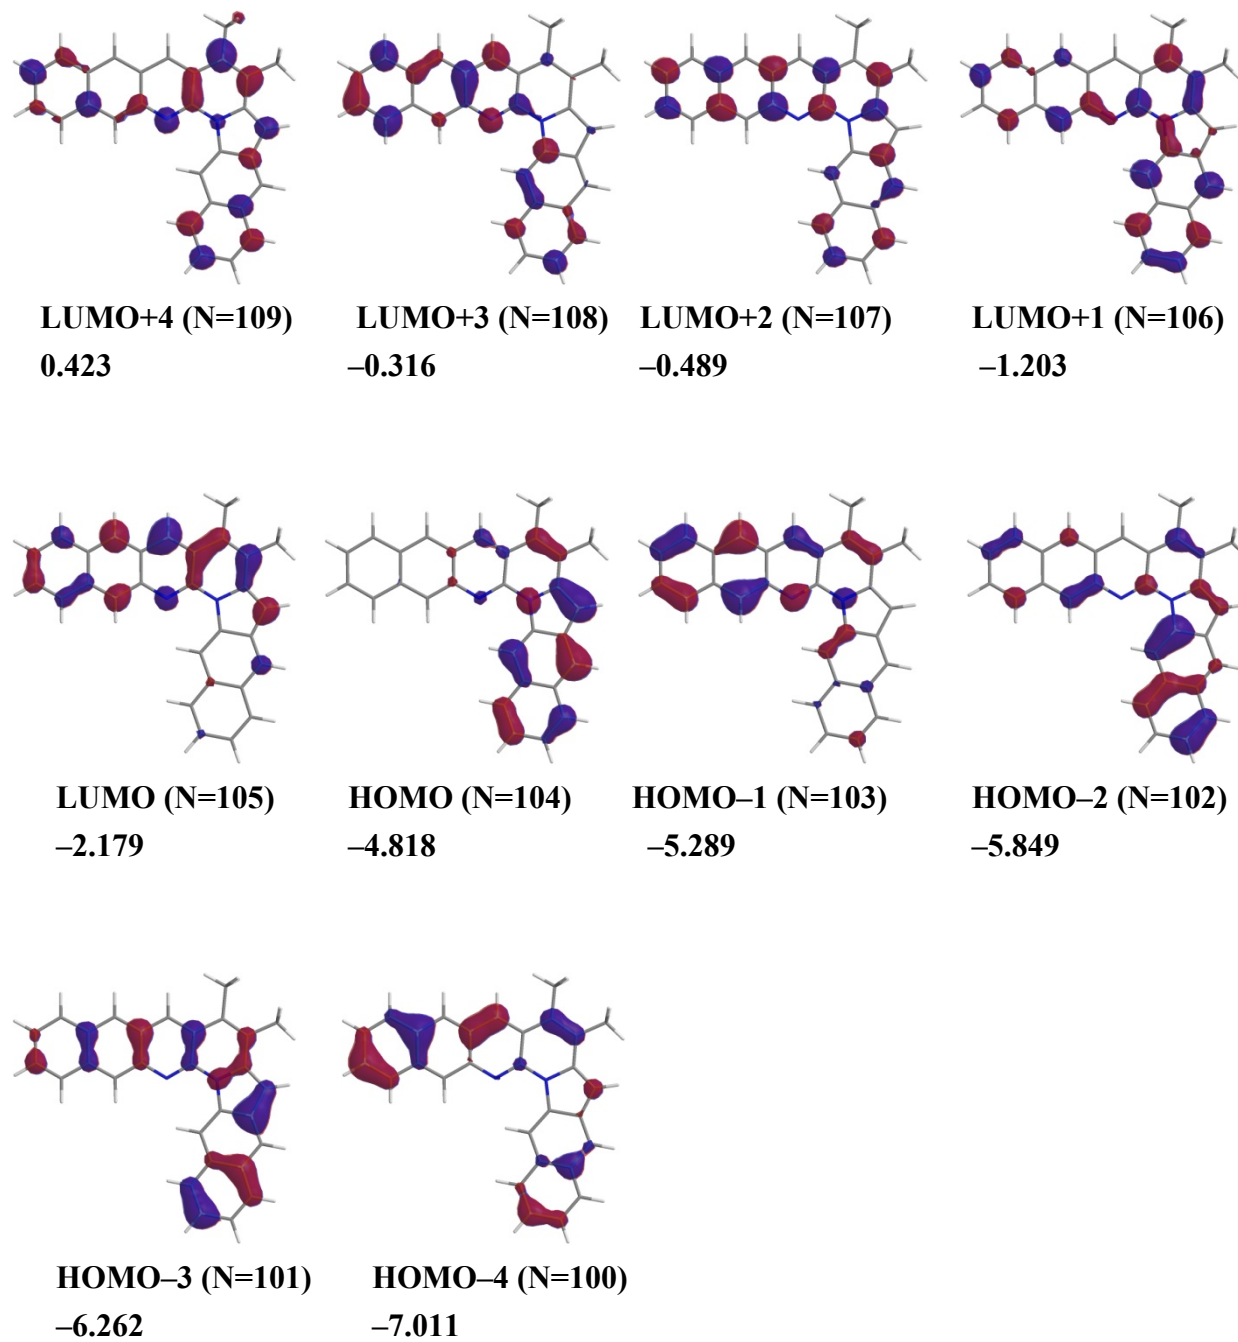

**Figure S20.** Selected molecular orbitals and their levels (eV) of 7a.

## 6.2 TDDFT Calculation of L-Shaped Compounds

### Transition energy, wavelengths, and oscillator strengths of the electronic transitions of 4a (The 78th orbital is HOMO shown in Figure S16)

Excitation energies and oscillator strengths:

|                               |           |           |          |                               |           |
|-------------------------------|-----------|-----------|----------|-------------------------------|-----------|
| Excited State 1: Singlet-A'   | 2.8616 eV | 433.27 nm | f=0.3051 | 75 -> 82                      | 0.13006   |
| 77 -> 80                      | -0.13499  |           |          | 76 -> 81                      | 0.39673   |
| 78 -> 79                      | 0.63738   |           |          | 78 -> 84                      | -0.33219  |
| Excited State 2: Singlet-A'   | 3.3257 eV | 372.81 nm | f=0.0189 | Excited State 19: Singlet-A'  | 5.8749 eV |
| 77 -> 79                      | 0.63829   |           |          | 70 -> 79                      | 0.12259   |
| 78 -> 80                      | 0.24744   |           |          | 71 -> 79                      | -0.11770  |
| Excited State 3: Singlet-A'   | 3.6530 eV | 339.41 nm | f=0.0082 | 72 -> 79                      | 0.13146   |
| 77 -> 79                      | -0.21723  |           |          | 73 -> 80                      | 0.13171   |
| 78 -> 80                      | 0.63842   |           |          | 75 -> 80                      | 0.12774   |
| Excited State 4: Singlet-A'   | 4.0677 eV | 304.80 nm | f=0.0512 | 75 -> 81                      | 0.17273   |
| 76 -> 79                      | 0.63989   |           |          | 76 -> 80                      | -0.12923  |
| 78 -> 81                      | 0.11352   |           |          | 77 -> 81                      | 0.10212   |
| Excited State 5: Singlet-A'   | 4.1713 eV | 297.23 nm | f=0.0039 | 77 -> 82                      | 0.40950   |
| 75 -> 79                      | 0.56802   |           |          | 77 -> 83                      | 0.20813   |
| 77 -> 80                      | 0.21023   |           |          | 77 -> 84                      | -0.20005  |
| 78 -> 81                      | 0.33201   |           |          | 78 -> 84                      | -0.16861  |
| Excited State 6: Singlet-A''  | 4.2556 eV | 291.35 nm | f=0.0005 | Excited State 20: Singlet-A'  | 5.9739 eV |
| 74 -> 79                      | 0.69195   |           |          | 73 -> 80                      | 0.24605   |
| Excited State 7: Singlet-A'   | 4.4572 eV | 278.16 nm | f=0.1154 | 75 -> 80                      | -0.13900  |
| 75 -> 79                      | -0.24257  |           |          | 75 -> 81                      | 0.28144   |
| 76 -> 79                      | -0.11611  |           |          | 76 -> 80                      | 0.11865   |
| 76 -> 80                      | 0.30423   |           |          | 76 -> 81                      | 0.30023   |
| 77 -> 81                      | -0.18290  |           |          | 77 -> 83                      | 0.34663   |
| 78 -> 81                      | 0.50655   |           |          | 77 -> 84                      | 0.16240   |
| Excited State 8: Singlet-A'   | 4.6155 eV | 268.62 nm | f=0.6709 | Excited State 21: Singlet-A'' | 6.0143 eV |
| 75 -> 79                      | -0.11702  |           |          | 74 -> 81                      | 0.69080   |
| 77 -> 80                      | 0.60913   |           |          | Excited State 22: Singlet-A'  | 6.0882 eV |
| 77 -> 81                      | -0.11513  |           |          | 72 -> 80                      | 0.25628   |
| 78 -> 81                      | -0.13197  |           |          | 73 -> 80                      | -0.24300  |
| Excited State 9: Singlet-A'   | 4.8534 eV | 255.46 nm | f=0.0968 | 75 -> 81                      | -0.25238  |
| 73 -> 79                      | -0.15929  |           |          | 75 -> 84                      | -0.11831  |
| 75 -> 79                      | -0.18043  |           |          | 76 -> 81                      | -0.11045  |
| 77 -> 81                      | 0.32150   |           |          | 77 -> 83                      | 0.46197   |
| 78 -> 82                      | 0.51066   |           |          | 78 -> 84                      | 0.10107   |
| 78 -> 84                      | 0.15533   |           |          | 78 -> 85                      | -0.12985  |
| Excited State 10: Singlet-A'  | 4.9664 eV | 249.65 nm | f=0.0398 | Excited State 23: Singlet-A'  | 6.1810 eV |
| 73 -> 79                      | 0.45443   |           |          | 71 -> 79                      | 0.23706   |
| 76 -> 80                      | 0.15774   |           |          | 73 -> 80                      | 0.33840   |
| 77 -> 81                      | -0.17332  |           |          | 75 -> 81                      | -0.28835  |
| 78 -> 82                      | 0.38112   |           |          | 76 -> 82                      | 0.18819   |
| 78 -> 83                      | -0.14639  |           |          | 77 -> 82                      | 0.15476   |
| 78 -> 84                      | -0.17094  |           |          | 77 -> 84                      | 0.32635   |
| Excited State 11: Singlet-A'  | 5.0690 eV | 244.59 nm | f=0.1033 | Excited State 24: Singlet-A'  | 6.2946 eV |
| 73 -> 79                      | 0.25608   |           |          | 70 -> 79                      | -0.22413  |
| 75 -> 80                      | -0.16137  |           |          | 71 -> 79                      | 0.12613   |
| 76 -> 80                      | 0.33021   |           |          | 72 -> 80                      | 0.15807   |
| 77 -> 81                      | 0.45479   |           |          | 73 -> 80                      | 0.15162   |
| 78 -> 82                      | -0.18693  |           |          | 75 -> 82                      | 0.11570   |
| 78 -> 84                      | 0.10816   |           |          | 76 -> 82                      | 0.46926   |
| Excited State 12: Singlet-A'' | 5.2146 eV | 237.76 nm | f=0.0002 | 77 -> 84                      | -0.30354  |
| 74 -> 80                      | 0.69107   |           |          | Excited State 25: Singlet-A'  | 6.4032 eV |
| Excited State 13: Singlet-A'  | 5.2509 eV | 236.12 nm | f=0.0656 | 71 -> 79                      | 0.44489   |
| 72 -> 79                      | -0.20325  |           |          | 72 -> 80                      | 0.23410   |
| 73 -> 79                      | -0.10674  |           |          | 73 -> 80                      | -0.13495  |
| 76 -> 80                      | 0.24840   |           |          | 75 -> 81                      | 0.12524   |
| 76 -> 81                      | -0.15061  |           |          | 75 -> 82                      | 0.25290   |
| 77 -> 82                      | 0.10001   |           |          | 76 -> 82                      | -0.18128  |
| 78 -> 83                      | 0.45970   |           |          | 76 -> 83                      | 0.10342   |
| 78 -> 84                      | -0.28411  |           |          | 76 -> 84                      | -0.10857  |
| Excited State 14: Singlet-A'  | 5.3264 eV | 232.77 nm | f=0.0955 | 78 -> 85                      | -0.11152  |
| 72 -> 79                      | 0.52608   |           |          | Excited State 26: Singlet-A'  | 6.4110 eV |
| 73 -> 79                      | -0.21006  |           |          | 70 -> 79                      | 0.40130   |
| 75 -> 80                      | 0.19543   |           |          | 71 -> 79                      | 0.27848   |
| 76 -> 80                      | 0.26005   |           |          | 72 -> 80                      | -0.31801  |
| Excited State 15: Singlet-A'  | 5.4293 eV | 228.36 nm | f=0.0958 | 73 -> 80                      | -0.12694  |
| 72 -> 79                      | -0.33540  |           |          | 76 -> 82                      | 0.14177   |
| 73 -> 79                      | -0.14911  |           |          | 76 -> 83                      | -0.10816  |
| 75 -> 80                      | 0.37894   |           |          | 77 -> 84                      | -0.20575  |
| 75 -> 81                      | -0.11970  |           |          | 78 -> 85                      | -0.15070  |
| 76 -> 80                      | 0.17688   |           |          | Excited State 27: Singlet-A'' | 6.4650 eV |
| 78 -> 83                      | -0.29682  |           |          | 69 -> 79                      | 0.68184   |
| 78 -> 84                      | 0.12518   |           |          | Excited State 28: Singlet-A'  | 6.4843 eV |
| Excited State 16: Singlet-A'  | 5.4679 eV | 226.75 nm | f=0.0025 | 70 -> 79                      | 0.30437   |
| 73 -> 79                      | 0.10447   |           |          | 71 -> 79                      | -0.12067  |
| 73 -> 80                      | -0.11818  |           |          | 72 -> 80                      | 0.27748   |
| 75 -> 80                      | 0.31319   |           |          | 73 -> 80                      | 0.21545   |
| 76 -> 81                      | 0.37051   |           |          | 75 -> 82                      | 0.30117   |
| 78 -> 83                      | 0.32267   |           |          | 76 -> 83                      | -0.24892  |
| 78 -> 84                      | 0.29257   |           |          | 78 -> 85                      | -0.16183  |
| Excited State 17: Singlet-A'  | 5.5496 eV | 223.41 nm | f=0.2347 | Excited State 29: Singlet-A'' | 6.5192 eV |
| 73 -> 79                      | -0.13979  |           |          | 74 -> 82                      | 0.65769   |
| 73 -> 80                      | -0.13481  |           |          | 74 -> 83                      | 0.13169   |
| 75 -> 80                      | -0.31116  |           |          | 74 -> 84                      | -0.10749  |
| 75 -> 81                      | -0.10390  |           |          | Excited State 30: Singlet-A'' | 6.5297 eV |
| 76 -> 80                      | 0.10714   |           |          | 78 -> 86                      | 0.6971    |
| 77 -> 81                      | -0.19322  |           |          |                               |           |
| 77 -> 82                      | 0.45421   |           |          |                               |           |
| 78 -> 84                      | 0.18575   |           |          |                               |           |
| Excited State 18: Singlet-A'  | 5.8066 eV | 213.52 nm | f=0.0800 |                               |           |
| 73 -> 79                      | -0.13221  |           |          |                               |           |
| 73 -> 80                      | -0.14537  |           |          |                               |           |
| 75 -> 81                      | -0.29848  |           |          |                               |           |

## Transition energy, wavelengths, and oscillator strengths of the electronic transitions of 5a (The 91st orbital is HOMO shown in Figure S17).

| Excitation energies and oscillator strengths: |             |           |                    |
|-----------------------------------------------|-------------|-----------|--------------------|
| Excited State 1:                              | Singlet-A'  | 2.6101 eV | 475.02 nm f=0.3594 |
| 91 -> 92                                      |             | 0.69248   |                    |
| Excited State 2:                              | Singlet-A'  | 2.7833 eV | 445.45 nm f=0.0186 |
| 90 -> 92                                      |             | 0.69382   |                    |
| Excited State 3:                              | Singlet-A'  | 3.3799 eV | 366.83 nm f=0.0514 |
| 89 -> 92                                      |             | 0.67845   |                    |
| 91 -> 93                                      |             | -0.10638  |                    |
| Excited State 4:                              | Singlet-A'  | 3.5726 eV | 347.04 nm f=0.1051 |
| 89 -> 92                                      |             | 0.11973   |                    |
| 91 -> 93                                      |             | 0.66794   |                    |
| 91 -> 94                                      |             | -0.12704  |                    |
| Excited State 5:                              | Singlet-A'  | 3.8005 eV | 326.23 nm f=0.0096 |
| 88 -> 92                                      |             | 0.54748   |                    |
| 90 -> 93                                      |             | -0.37136  |                    |
| 90 -> 94                                      |             | 0.15634   |                    |
| 91 -> 94                                      |             | 0.10772   |                    |
| Excited State 6:                              | Singlet-A'' | 3.9725 eV | 312.11 nm f=0.0004 |
| 87 -> 92                                      |             | 0.70130   |                    |
| Excited State 7:                              | Singlet-A'  | 4.0650 eV | 305.01 nm f=0.2551 |
| 88 -> 92                                      |             | 0.22266   |                    |
| 90 -> 93                                      |             | 0.50566   |                    |
| 90 -> 94                                      |             | 0.13626   |                    |
| 91 -> 93                                      |             | 0.10996   |                    |
| 91 -> 94                                      |             | 0.38715   |                    |
| Excited State 8:                              | Singlet-A'  | 4.1934 eV | 295.66 nm f=0.0393 |
| 89 -> 93                                      |             | -0.27140  |                    |
| 90 -> 93                                      |             | -0.23036  |                    |
| 90 -> 94                                      |             | -0.32391  |                    |
| 91 -> 94                                      |             | 0.44718   |                    |
| 91 -> 95                                      |             | 0.17346   |                    |
| Excited State 9:                              | Singlet-A'  | 4.4021 eV | 281.65 nm f=0.3270 |
| 86 -> 92                                      |             | 0.49777   |                    |
| 88 -> 92                                      |             | 0.21290   |                    |
| 90 -> 94                                      |             | -0.31238  |                    |
| 91 -> 95                                      |             | -0.19959  |                    |
| 91 -> 96                                      |             | 0.11355   |                    |
| Excited State 10:                             | Singlet-A'  | 4.5419 eV | 272.98 nm f=0.1782 |
| 85 -> 92                                      |             | 0.21378   |                    |
| 88 -> 92                                      |             | 0.18023   |                    |
| 89 -> 93                                      |             | 0.25136   |                    |
| 90 -> 94                                      |             | -0.17843  |                    |
| 91 -> 94                                      |             | -0.10349  |                    |
| 91 -> 95                                      |             | 0.53712   |                    |
| Excited State 11:                             | Singlet-A'  | 4.5986 eV | 269.61 nm f=0.2715 |
| 85 -> 92                                      |             | -0.32930  |                    |
| 86 -> 92                                      |             | 0.38020   |                    |
| 90 -> 94                                      |             | 0.31726   |                    |
| 91 -> 95                                      |             | 0.30995   |                    |
| Excited State 12:                             | Singlet-A'  | 4.6945 eV | 264.10 nm f=0.3210 |
| 85 -> 92                                      |             | 0.47772   |                    |
| 86 -> 92                                      |             | 0.14417   |                    |
| 89 -> 93                                      |             | -0.23655  |                    |
| 90 -> 94                                      |             | 0.28223   |                    |
| 90 -> 95                                      |             | 0.27911   |                    |
| Excited State 13:                             | Singlet-A'  | 4.7827 eV | 259.24 nm f=0.1662 |
| 86 -> 92                                      |             | 0.19163   |                    |
| 88 -> 92                                      |             | -0.10584  |                    |
| 89 -> 93                                      |             | 0.46689   |                    |
| 90 -> 95                                      |             | 0.38436   |                    |
| 91 -> 94                                      |             | 0.18632   |                    |
| 91 -> 97                                      |             | 0.10541   |                    |
| Excited State 14:                             | Singlet-A'  | 4.9316 eV | 251.41 nm f=0.3597 |
| 85 -> 92                                      |             | -0.21632  |                    |
| 88 -> 92                                      |             | 0.13404   |                    |
| 89 -> 93                                      |             | -0.13686  |                    |
| 89 -> 94                                      |             | -0.31746  |                    |
| 90 -> 95                                      |             | 0.43180   |                    |
| 90 -> 96                                      |             | -0.11261  |                    |
| 91 -> 94                                      |             | -0.15549  |                    |
| 91 -> 97                                      |             | -0.17247  |                    |
| Excited State 15:                             | Singlet-A'' | 5.1464 eV | 240.91 nm f=0.0000 |
| 87 -> 93                                      |             | 0.68402   |                    |
| 87 -> 94                                      |             | -0.15206  |                    |
| Excited State 16:                             | Singlet-A'  | 5.1509 eV | 240.70 nm f=0.0956 |
| 84 -> 92                                      |             | -0.20229  |                    |
| 85 -> 92                                      |             | 0.13303   |                    |
| 88 -> 93                                      |             | 0.48756   |                    |
| 88 -> 94                                      |             | 0.13456   |                    |
| 89 -> 94                                      |             | -0.25115  |                    |
| 89 -> 95                                      |             | 0.12453   |                    |
| 91 -> 97                                      |             | -0.18111  |                    |
| 91 -> 98                                      |             | 0.10950   |                    |
| Excited State 17:                             | Singlet-A'  | 5.2046 eV | 238.22 nm f=0.0382 |
| 84 -> 92                                      |             | 0.60441   |                    |
| 88 -> 93                                      |             | 0.15819   |                    |
| 89 -> 94                                      |             | -0.13113  |                    |
| 90 -> 97                                      |             | -0.14597  |                    |
| 90 -> 98                                      |             | -0.13198  |                    |
| 91 -> 98                                      |             | -0.11991  |                    |
| Excited State 18:                             | Singlet-A'  | 5.2414 eV | 236.55 nm f=0.0799 |
| 86 -> 93                                      |             | -0.17896  |                    |
| 88 -> 93                                      |             | -0.13143  |                    |
| 89 -> 94                                      |             | -0.15343  |                    |
| 89 -> 95                                      |             | 0.22324   |                    |
| 90 -> 95                                      |             | -0.14040  |                    |
| 91 -> 96                                      |             | 0.53575   |                    |
| 91 -> 97                                      |             | 0.14525   |                    |
| Excited State 19:                             | Singlet-A'  | 5.2919 eV | 234.29 nm f=0.0342 |
| 86 -> 93                                      |             | 0.12857   |                    |
| 88 -> 93                                      |             | 0.17843   |                    |
| 88 -> 94                                      |             | -0.12705  |                    |
| 89 -> 94                                      |             | -0.30352  |                    |
| 89 -> 95                                      |             | -0.27148  |                    |
| 90 -> 96                                      |             | 0.14715   |                    |
| 91 -> 97                                      |             | 0.44417   |                    |
| Excited State 20:                             | Singlet-A'  | 5.4081 eV | 229.25 nm f=0.2081 |
| 85 -> 92                                      |             | -0.10823  |                    |
| 86 -> 93                                      |             | -0.10677  |                    |
| 88 -> 93                                      |             | 0.31094   |                    |
| 89 -> 94                                      |             | 0.34691   |                    |
| 90 -> 95                                      |             | 0.12637   |                    |
| 90 -> 96                                      |             | -0.34477  |                    |
| 91 -> 96                                      |             | 0.10915   |                    |
| 91 -> 97                                      |             | 0.17808   |                    |
| 91 -> 98                                      |             | -0.12077  |                    |
| Excited State 21:                             | Singlet-A'  | 5.5041 eV | 225.26 nm f=0.0152 |
| 83 -> 92                                      |             | 0.19250   |                    |
| 84 -> 92                                      |             | 0.11817   |                    |
| 86 -> 93                                      |             | -0.19426  |                    |
| 88 -> 93                                      |             | -0.14783  |                    |
| 88 -> 94                                      |             | 0.29001   |                    |
| 88 -> 95                                      |             | 0.10117   |                    |
| 90 -> 96                                      |             | -0.14439  |                    |
| 91 -> 96                                      |             | -0.28018  |                    |
| 91 -> 97                                      |             | 0.33252   |                    |
| 91 -> 98                                      |             | 0.16349   |                    |
| Excited State 22:                             | Singlet-A'  | 5.6040 eV | 221.24 nm f=0.0276 |
| 83 -> 92                                      |             | -0.12714  |                    |
| 85 -> 93                                      |             | -0.10768  |                    |
| 86 -> 93                                      |             | 0.36845   |                    |
| 88 -> 94                                      |             | -0.12508  |                    |
| 89 -> 95                                      |             | 0.25483   |                    |
| 90 -> 96                                      |             | -0.12361  |                    |
| 90 -> 97                                      |             | -0.21386  |                    |
| 91 -> 97                                      |             | 0.12513   |                    |
| 91 -> 98                                      |             | 0.37914   |                    |
| Excited State 23:                             | Singlet-A'  | 5.6540 eV | 219.29 nm f=0.1389 |
| 86 -> 93                                      |             | -0.27333  |                    |
| 89 -> 95                                      |             | -0.38639  |                    |
| 90 -> 97                                      |             | -0.11191  |                    |
| 91 -> 98                                      |             | 0.42858   |                    |
| Excited State 24:                             | Singlet-A'  | 5.6708 eV | 218.64 nm f=0.0665 |
| 83 -> 92                                      |             | -0.14272  |                    |
| 84 -> 92                                      |             | 0.11744   |                    |
| 85 -> 93                                      |             | 0.21770   |                    |
| 89 -> 95                                      |             | 0.24398   |                    |
| 90 -> 96                                      |             | 0.32404   |                    |
| 90 -> 97                                      |             | 0.39331   |                    |
| 91 -> 97                                      |             | 0.12683   |                    |
| 91 -> 98                                      |             | 0.17428   |                    |
| Excited State 25:                             | Singlet-A'  | 5.7587 eV | 215.30 nm f=0.0250 |
| 83 -> 92                                      |             | 0.55313   |                    |
| 85 -> 93                                      |             | 0.15192   |                    |
| 88 -> 94                                      |             | -0.28770  |                    |
| 91 -> 98                                      |             | 0.13637   |                    |
| 91 -> 99                                      |             | -0.12157  |                    |

## Transition energy, wavelengths, and oscillator strengths of the electronic transitions of 6a (The 91st orbital is HOMO shown in Figure S18).

| Excitation energies and oscillator strengths: |             |           |                    |
|-----------------------------------------------|-------------|-----------|--------------------|
| Excited State 1:                              | Singlet-A'  | 2.5726 eV | 481.93 nm f=0.2871 |
| 91 -> 92                                      |             | 0.69443   |                    |
| Excited State 2:                              | Singlet-A'  | 3.1211 eV | 397.24 nm f=0.0571 |
| 90 -> 92                                      |             | 0.55408   |                    |
| 91 -> 93                                      |             | -0.40653  |                    |
| 91 -> 94                                      |             | -0.12201  |                    |
| Excited State 3:                              | Singlet-A'  | 3.3382 eV | 371.41 nm f=0.0608 |
| 90 -> 92                                      |             | 0.40483   |                    |
| 91 -> 93                                      |             | 0.55915   |                    |
| Excited State 4:                              | Singlet-A'  | 3.6873 eV | 336.25 nm f=0.0279 |
| 89 -> 92                                      |             | 0.55460   |                    |
| 91 -> 94                                      |             | -0.40180  |                    |
| Excited State 5:                              | Singlet-A'  | 3.8334 eV | 323.43 nm f=0.1267 |
| 88 -> 92                                      |             | 0.16654   |                    |
| 88 -> 93                                      |             | 0.11721   |                    |
| 89 -> 92                                      |             | 0.39292   |                    |
| 90 -> 93                                      |             | -0.14268  |                    |
| 91 -> 94                                      |             | 0.50549   |                    |
| Excited State 6:                              | Singlet-A'  | 4.0133 eV | 308.93 nm f=0.0785 |
| 88 -> 92                                      |             | 0.63732   |                    |
| 90 -> 93                                      |             | 0.13484   |                    |
| 90 -> 94                                      |             | -0.12232  |                    |
| 91 -> 94                                      |             | -0.11200  |                    |
| Excited State 7:                              | Singlet-A'  | 4.1068 eV | 301.90 nm f=0.2598 |
| 90 -> 93                                      |             | 0.59330   |                    |
| 91 -> 94                                      |             | 0.17450   |                    |
| 91 -> 95                                      |             | 0.27991   |                    |
| 91 -> 96                                      |             | 0.11914   |                    |
| Excited State 8:                              | Singlet-A'  | 4.2251 eV | 293.45 nm f=0.0004 |
| 87 -> 92                                      |             | 0.69610   |                    |
| 87 -> 93                                      |             | -0.10501  |                    |
| Excited State 9:                              | Singlet-A'  | 4.3937 eV | 282.18 nm f=0.2119 |
| 86 -> 92                                      |             | 0.11830   |                    |
| 88 -> 93                                      |             | -0.22763  |                    |
| 90 -> 93                                      |             | -0.23523  |                    |
| 90 -> 94                                      |             | -0.39450  |                    |
| 91 -> 95                                      |             | 0.40870   |                    |
| Excited State 10:                             | Singlet-A'  | 4.5231 eV | 274.12 nm f=0.1374 |
| 86 -> 92                                      |             | -0.21495  |                    |
| 89 -> 93                                      |             | -0.37035  |                    |
| 90 -> 94                                      |             | 0.25334   |                    |
| 91 -> 95                                      |             | 0.41678   |                    |
| 91 -> 96                                      |             | -0.21607  |                    |
| Excited State 11:                             | Singlet-A'  | 4.6925 eV | 264.22 nm f=0.0135 |
| 85 -> 92                                      |             | 0.11087   |                    |
| 86 -> 92                                      |             | -0.40939  |                    |
| 88 -> 93                                      |             | 0.14296   |                    |
| 89 -> 93                                      |             | 0.45987   |                    |
| 91 -> 96                                      |             | -0.22553  |                    |
| Excited State 12:                             | Singlet-A'  | 4.7925 eV | 258.70 nm f=0.2644 |
| 85 -> 92                                      |             | 0.12962   |                    |
| 88 -> 93                                      |             | 0.50172   |                    |
| 89 -> 93                                      |             | -0.20875  |                    |
| 89 -> 94                                      |             | 0.11460   |                    |
| 90 -> 94                                      |             | -0.36762  |                    |
| Excited State 13:                             | Singlet-A'  | 4.8274 eV | 256.84 nm f=0.0584 |
| 85 -> 92                                      |             | 0.35990   |                    |
| 86 -> 92                                      |             | 0.36381   |                    |
| 88 -> 94                                      |             | -0.17472  |                    |
| 89 -> 93                                      |             | 0.18574   |                    |
| 89 -> 94                                      |             | -0.11153  |                    |
| 90 -> 94                                      |             | 0.13141   |                    |
| 91 -> 95                                      |             | 0.11218   |                    |
| 91 -> 96                                      |             | -0.16000  |                    |
| 91 -> 97                                      |             | 0.27082   |                    |
| Excited State 14:                             | Singlet-A'  | 4.9311 eV | 251.43 nm f=0.0232 |
| 86 -> 92                                      |             | -0.17366  |                    |
| 89 -> 94                                      |             | -0.11787  |                    |
| 91 -> 96                                      |             | 0.43866   |                    |
| 91 -> 97                                      |             | 0.47265   |                    |
| Excited State 15:                             | Singlet-A'  | 4.9721 eV | 249.36 nm f=0.0164 |
| 85 -> 92                                      |             | 0.51490   |                    |
| 88 -> 93                                      |             | -0.22733  |                    |
| 88 -> 94                                      |             | 0.22008   |                    |
| 89 -> 93                                      |             | -0.10490  |                    |
| 89 -> 94                                      |             | 0.12674   |                    |
| 90 -> 95                                      |             | -0.14091  |                    |
| 90 -> 96                                      |             | 0.11509   |                    |
| 91 -> 96                                      |             | 0.15623   |                    |
| Excited State 16:                             | Singlet-A'' | 5.0599 eV | 245.03 nm f=0.0003 |
| 87 -> 93                                      |             | 0.65741   |                    |
| 87 -> 94                                      |             | 0.22629   |                    |
| Excited State 17:                             | Singlet-A'  | 5.1541 eV | 240.56 nm f=0.3294 |
| 88 -> 93                                      |             | -0.22003  |                    |
| 89 -> 94                                      |             | 0.41289   |                    |
| 90 -> 94                                      |             | -0.14154  |                    |
| 90 -> 95                                      |             | 0.17732   |                    |
| 91 -> 96                                      |             | -0.19640  |                    |
| 91 -> 97                                      |             | 0.37497   |                    |
| Excited State 18:                             | Singlet-A'  | 5.2719 eV | 235.18 nm f=0.1182 |
| 85 -> 92                                      |             | 0.12890   |                    |
| 86 -> 93                                      |             | -0.11211  |                    |
| 88 -> 94                                      |             | 0.20978   |                    |
| 89 -> 94                                      |             | -0.29381  |                    |
| 90 -> 94                                      |             | -0.10182  |                    |
| 90 -> 95                                      |             | 0.53034   |                    |
| Excited State 19:                             | Singlet-A'  | 5.3292 eV | 232.65 nm f=0.1903 |
| 84 -> 92                                      |             | 0.41335   |                    |
| 86 -> 92                                      |             | -0.10094  |                    |
| 86 -> 93                                      |             | -0.22198  |                    |
| 88 -> 93                                      |             | -0.11502  |                    |
| 88 -> 94                                      |             | -0.18561  |                    |
| 90 -> 95                                      |             | -0.15850  |                    |
| 91 -> 98                                      |             | 0.35634   |                    |
| Excited State 20:                             | Singlet-A'  | 5.4471 eV | 227.62 nm f=0.4501 |
| 85 -> 93                                      |             | -0.18723  |                    |
| 86 -> 92                                      |             | 0.22263   |                    |
| 86 -> 93                                      |             | 0.15110   |                    |
| 88 -> 94                                      |             | 0.28943   |                    |
| 89 -> 94                                      |             | 0.16512   |                    |
| 89 -> 95                                      |             | -0.18883  |                    |
| 90 -> 94                                      |             | 0.14475   |                    |
| 91 -> 98                                      |             | 0.37518   |                    |
| Excited State 21:                             | Singlet-A'  | 5.4917 eV | 225.77 nm f=0.0073 |
| 84 -> 92                                      |             | 0.43598   |                    |
| 86 -> 93                                      |             | 0.20135   |                    |
| 88 -> 94                                      |             | 0.15696   |                    |
| 89 -> 94                                      |             | -0.16481  |                    |
| 89 -> 95                                      |             | -0.18220  |                    |
| 90 -> 96                                      |             | 0.12551   |                    |
| 90 -> 97                                      |             | -0.15462  |                    |
| 91 -> 96                                      |             | -0.11603  |                    |
| 91 -> 98                                      |             | -0.28836  |                    |
| Excited State 22:                             | Singlet-A'  | 5.5566 eV | 223.13 nm f=0.1594 |
| 84 -> 92                                      |             | -0.27718  |                    |
| 89 -> 94                                      |             | -0.23480  |                    |
| 89 -> 95                                      |             | -0.26937  |                    |
| 90 -> 95                                      |             | -0.22585  |                    |
| 90 -> 96                                      |             | 0.29889   |                    |
| 91 -> 96                                      |             | -0.15626  |                    |
| 91 -> 97                                      |             | 0.12818   |                    |
| 91 -> 98                                      |             | 0.18623   |                    |
| Excited State 23:                             | Singlet-A'  | 5.6187 eV | 220.66 nm f=0.2488 |
| 85 -> 93                                      |             | -0.18868  |                    |
| 86 -> 93                                      |             | 0.16932   |                    |
| 88 -> 94                                      |             | -0.33024  |                    |
| 90 -> 95                                      |             | 0.18843   |                    |
| 90 -> 96                                      |             | 0.45412   |                    |
| 90 -> 97                                      |             | 0.17306   |                    |
| Excited State 24:                             | Singlet-A'' | 5.6799 eV | 218.29 nm f=0.0001 |
| 87 -> 93                                      |             | -0.21458  |                    |
| 87 -> 94                                      |             | 0.65763   |                    |
| Excited State 25:                             | Singlet-A'  | 5.7320 eV | 216.30 nm f=0.0217 |
| 83 -> 92                                      |             | 0.21019   |                    |
| 85 -> 93                                      |             | 0.39956   |                    |
| 86 -> 93                                      |             | 0.27873   |                    |
| 88 -> 94                                      |             | 0.11282   |                    |
| 89 -> 95                                      |             | 0.13553   |                    |
| 90 -> 97                                      |             | 0.35311   |                    |
| 91 -> 98                                      |             | 0.14639   |                    |

## Transition energy, wavelengths, and oscillator strengths of the electronic transitions of 7a (The 104th orbital is HOMO shown in Figure S19).

Excitation energies and oscillator strengths:

|                               |           |           |          |                               |           |           |          |
|-------------------------------|-----------|-----------|----------|-------------------------------|-----------|-----------|----------|
| Excited State 1: Singlet-A'   | 2.3847 eV | 519.91 nm | f=0.3278 | 102 ->108                     | 0.53899   |           |          |
| 103 ->105                     | -0.16799  |           |          | 103 ->107                     | 0.11749   |           |          |
| 104 ->105                     | 0.63012   |           |          | 104 ->110                     | -0.32056  |           |          |
| Excited State 2: Singlet-A'   | 2.7341 eV | 453.47 nm | f=0.1691 | Excited State 21: Singlet-A'  | 5.0981 eV | 243.20 nm | f=0.5377 |
| 103 ->105                     | 0.62984   |           |          | 100 ->106                     | 0.31407   |           |          |
| 104 ->105                     | 0.13664   |           |          | 101 ->106                     | 0.10405   |           |          |
| Excited State 3: Singlet-A'   | 3.1484 eV | 393.80 nm | f=0.0038 | 101 ->107                     | -0.21171  |           |          |
| 102 ->105                     | 0.57608   |           |          | 102 ->106                     | 0.11630   |           |          |
| 104 ->106                     | -0.34924  |           |          | 102 ->107                     | 0.25442   |           |          |
| Excited State 4: Singlet-A'   | 3.1858 eV | 389.18 nm | f=0.0046 | 102 ->108                     | 0.25098   |           |          |
| 102 ->105                     | 0.36449   |           |          | 103 ->107                     | -0.10791  |           |          |
| 104 ->106                     | 0.55590   |           |          | 103 ->109                     | 0.16065   |           |          |
| Excited State 5: Singlet-A'   | 3.5679 eV | 347.50 nm | f=0.0216 | 104 ->110                     | 0.25607   |           |          |
| 101 ->105                     | 0.52096   |           |          | Excited State 22: Singlet-A'  | 5.1830 eV | 239.22 nm | f=0.0330 |
| 103 ->106                     | -0.36020  |           |          | 96 ->105                      | -0.19358  |           |          |
| 103 ->107                     | 0.17944   |           |          | 98 ->106                      | 0.20900   |           |          |
| 104 ->107                     | 0.16080   |           |          | 101 ->107                     | 0.13319   |           |          |
| Excited State 6: Singlet-A'   | 3.7099 eV | 334.20 nm | f=0.2904 | 101 ->108                     | -0.16635  |           |          |
| 101 ->105                     | 0.33222   |           |          | 102 ->108                     | -0.14107  |           |          |
| 102 ->106                     | -0.10504  |           |          | 103 ->109                     | 0.50012   |           |          |
| 103 ->106                     | 0.54538   |           |          | 104 ->110                     | -0.15156  |           |          |
| 103 ->107                     | 0.17532   |           |          | 104 ->112                     | 0.15415   |           |          |
| Excited State 7: Singlet-A'   | 3.8315 eV | 323.59 nm | f=0.1351 | Excited State 23: Singlet-A'  | 5.2457 eV | 236.35 nm | f=0.0520 |
| 101 ->106                     | 0.11712   |           |          | 96 ->105                      | 0.47586   |           |          |
| 102 ->106                     | 0.16318   |           |          | 97 ->105                      | 0.12471   |           |          |
| 104 ->107                     | 0.62948   |           |          | 98 ->106                      | 0.17375   |           |          |
| Excited State 8: Singlet-A''  | 3.9635 eV | 312.81 nm | f=0.0003 | 103 ->109                     | 0.20033   |           |          |
| 99 ->105                      | 0.69335   |           |          | 103 ->110                     | 0.33536   |           |          |
| Excited State 9: Singlet-A'   | 3.9805 eV | 311.48 nm | f=0.0548 | 103 ->111                     | -0.12549  |           |          |
| 102 ->106                     | -0.27057  |           |          | Excited State 24: Singlet-A'  | 5.3055 eV | 233.69 nm | f=0.0383 |
| 103 ->106                     | -0.10549  |           |          | 95 ->105                      | 0.18448   |           |          |
| 104 ->107                     | 0.12029   |           |          | 96 ->105                      | -0.22998  |           |          |
| 104 ->108                     | 0.59137   |           |          | 98 ->106                      | 0.32371   |           |          |
| 104 ->110                     | 0.10642   |           |          | 100 ->106                     | -0.24476  |           |          |
| Excited State 10: Singlet-A'  | 4.1885 eV | 296.01 nm | f=0.1841 | 101 ->107                     | -0.29310  |           |          |
| 98 ->105                      | 0.25121   |           |          | 101 ->108                     | 0.17820   |           |          |
| 100 ->105                     | 0.23901   |           |          | 103 ->110                     | 0.22960   |           |          |
| 101 ->105                     | -0.13176  |           |          | 104 ->110                     | 0.10472   |           |          |
| 101 ->106                     | -0.15370  |           |          | 104 ->112                     | 0.15529   |           |          |
| 102 ->106                     | 0.32756   |           |          | Excited State 25: Singlet-A'  | 5.3392 eV | 232.22 nm | f=0.0153 |
| 103 ->107                     | 0.42844   |           |          | 95 ->105                      | 0.15915   |           |          |
| Excited State 11: Singlet-A'  | 4.2745 eV | 290.06 nm | f=0.1113 | 96 ->105                      | -0.20545  |           |          |
| 100 ->105                     | 0.43184   |           |          | 98 ->106                      | -0.30280  |           |          |
| 101 ->105                     | -0.11092  |           |          | 101 ->107                     | 0.23433   |           |          |
| 102 ->106                     | -0.36561  |           |          | 102 ->108                     | 0.13442   |           |          |
| 103 ->108                     | -0.20450  |           |          | 103 ->110                     | 0.40473   |           |          |
| 104 ->108                     | -0.23044  |           |          | 103 ->111                     | 0.13857   |           |          |
| 104 ->110                     | 0.19667   |           |          | 104 ->111                     | 0.11215   |           |          |
| Excited State 12: Singlet-A'  | 4.3684 eV | 283.82 nm | f=0.1078 | 104 ->112                     | -0.15224  |           |          |
| 98 ->105                      | 0.55499   |           |          | Excited State 26: Singlet-A'  | 5.3720 eV | 230.80 nm | f=0.0544 |
| 100 ->105                     | -0.12526  |           |          | 98 ->106                      | 0.15095   |           |          |
| 102 ->106                     | -0.21173  |           |          | 100 ->106                     | 0.34459   |           |          |
| 103 ->108                     | 0.27454   |           |          | 101 ->107                     | 0.31513   |           |          |
| 104 ->108                     | -0.11989  |           |          | 101 ->108                     | 0.29624   |           |          |
| Excited State 13: Singlet-A'  | 4.4885 eV | 276.23 nm | f=0.0721 | 104 ->111                     | -0.17701  |           |          |
| 98 ->105                      | -0.21234  |           |          | 104 ->112                     | 0.27988   |           |          |
| 101 ->106                     | -0.22754  |           |          | Excited State 27: Singlet-A'  | 5.4290 eV | 228.37 nm | f=0.0307 |
| 102 ->107                     | -0.14786  |           |          | 95 ->105                      | 0.30649   |           |          |
| 103 ->107                     | 0.13841   |           |          | 96 ->105                      | 0.13988   |           |          |
| 103 ->108                     | 0.45799   |           |          | 98 ->106                      | 0.12437   |           |          |
| 104 ->110                     | 0.28325   |           |          | 100 ->106                     | 0.14387   |           |          |
| Excited State 14: Singlet-A'  | 4.5350 eV | 273.39 nm | f=0.0522 | 103 ->110                     | -0.14787  |           |          |
| 98 ->105                      | -0.11066  |           |          | 104 ->111                     | 0.52653   |           |          |
| 100 ->105                     | 0.31656   |           |          | Excited State 28: Singlet-A'  | 5.4428 eV | 227.79 nm | f=0.0071 |
| 101 ->106                     | 0.47435   |           |          | 95 ->105                      | 0.43057   |           |          |
| 103 ->108                     | 0.28369   |           |          | 98 ->106                      | 0.17147   |           |          |
| 104 ->110                     | -0.12275  |           |          | 101 ->108                     | -0.14092  |           |          |
| Excited State 15: Singlet-A'  | 4.6394 eV | 267.24 nm | f=0.5737 | 103 ->110                     | -0.11225  |           |          |
| 100 ->105                     | -0.14781  |           |          | 104 ->111                     | -0.36365  |           |          |
| 101 ->106                     | 0.32022   |           |          | 104 ->112                     | -0.27147  |           |          |
| 102 ->107                     | -0.30795  |           |          | Excited State 29: Singlet-A'  | 5.4933 eV | 225.70 nm | f=0.0061 |
| 103 ->107                     | 0.27472   |           |          | 95 ->105                      | 0.22154   |           |          |
| 103 ->108                     | -0.17558  |           |          | 96 ->105                      | 0.18286   |           |          |
| 103 ->109                     | 0.10344   |           |          | 97 ->106                      | -0.16043  |           |          |
| 104 ->109                     | 0.21948   |           |          | 98 ->106                      | -0.23895  |           |          |
| 104 ->110                     | 0.22995   |           |          | 101 ->108                     | -0.25067  |           |          |
| Excited State 16: Singlet-A'  | 4.7513 eV | 260.95 nm | f=0.0141 | 102 ->109                     | -0.19098  |           |          |
| 102 ->107                     | 0.22119   |           |          | 103 ->112                     | -0.10211  |           |          |
| 104 ->109                     | 0.60838   |           |          | 104 ->112                     | 0.38941   |           |          |
| Excited State 17: Singlet-A'  | 4.8414 eV | 256.09 nm | f=0.0446 | Excited State 30: Singlet-A'  | 5.6123 eV | 220.92 nm | f=0.5679 |
| 97 ->105                      | 0.61338   |           |          | 95 ->105                      | 0.10401   |           |          |
| 102 ->107                     | 0.17008   |           |          | 100 ->106                     | 0.30745   |           |          |
| Excited State 18: Singlet-A'  | 4.9304 eV | 251.47 nm | f=0.4837 | 101 ->107                     | -0.23644  |           |          |
| 97 ->105                      | -0.23712  |           |          | 102 ->108                     | -0.14878  |           |          |
| 98 ->105                      | -0.12619  |           |          | 102 ->109                     | 0.21068   |           |          |
| 100 ->105                     | -0.19079  |           |          | 102 ->110                     | 0.24655   |           |          |
| 100 ->106                     | -0.14220  |           |          | 103 ->109                     | -0.10532  |           |          |
| 101 ->108                     | 0.16828   |           |          | 103 ->110                     | 0.23060   |           |          |
| 102 ->106                     | -0.12197  |           |          | 104 ->110                     | -0.16258  |           |          |
| 102 ->107                     | 0.39502   |           |          | Excited State 31: Singlet-A'' | 5.6566 eV | 219.19 nm | f=0.0000 |
| 103 ->107                     | 0.21420   |           |          | 99 ->106                      | 0.16161   |           |          |
| 103 ->109                     | 0.16652   |           |          | 99 ->107                      | 0.66298   |           |          |
| 104 ->109                     | -0.11082  |           |          | 99 ->108                      | -0.13951  |           |          |
| Excited State 19: Singlet-A'' | 4.9452 eV | 250.71 nm | f=0.0001 | Excited State 32: Singlet-A'  | 5.6703 eV | 218.66 nm | f=0.0914 |
| 99 ->106                      | 0.67763   |           |          | 97 ->106                      | 0.16797   |           |          |
| 99 ->107                      | -0.15728  |           |          | 98 ->106                      | -0.12622  |           |          |
| Excited State 20: Singlet-A'  | 5.0036 eV | 247.79 nm | f=0.2212 | 98 ->107                      | -0.17522  |           |          |
| 102 ->106                     | -0.11816  |           |          | 100 ->107                     | 0.17814   |           |          |
|                               |           |           |          | 100 ->108                     | 0.11630   |           |          |

|                              |           |           |          |
|------------------------------|-----------|-----------|----------|
| 101 ->108                    | 0.30996   |           |          |
| 101 ->110                    | -0.16061  |           |          |
| 102 ->109                    | -0.13018  |           |          |
| 102 ->110                    | 0.17829   |           |          |
| 103 ->109                    | 0.15210   |           |          |
| 103 ->111                    | -0.14145  |           |          |
| 103 ->112                    | -0.10876  |           |          |
| 104 ->111                    | -0.10561  |           |          |
| 104 ->113                    | -0.19918  |           |          |
| Excited State 33: Singlet-A' | 5.7378 eV | 216.08 nm | f=0.1787 |
| 95 ->105                     | 0.11340   |           |          |
| 96 ->105                     | 0.12283   |           |          |
| 98 ->106                     | -0.13772  |           |          |
| 100 ->108                    | -0.17141  |           |          |
| 101 ->108                    | 0.15023   |           |          |
| 101 ->110                    | 0.12016   |           |          |
| 102 ->107                    | -0.11066  |           |          |
| 102 ->109                    | 0.46214   |           |          |
| 102 ->110                    | -0.11724  |           |          |
| 103 ->109                    | 0.15862   |           |          |
| 103 ->110                    | -0.11528  |           |          |
| 103 ->111                    | 0.10231   |           |          |
| Excited State 34: Singlet-A' | 5.7721 eV | 214.80 nm | f=0.0100 |
| 92 ->105                     | -0.15218  |           |          |
| 93 ->105                     | -0.10284  |           |          |
| 96 ->105                     | 0.12634   |           |          |
| 96 ->106                     | 0.13949   |           |          |
| 97 ->106                     | -0.22861  |           |          |
| 101 ->107                    | -0.11690  |           |          |
| 101 ->108                    | 0.10429   |           |          |
| 102 ->109                    | -0.16280  |           |          |
| 103 ->111                    | 0.46187   |           |          |
| 104 ->113                    | -0.17783  |           |          |
| Excited State 35: Singlet-A" | 5.8466 eV | 212.06 nm | f=0.0008 |
| 99 ->107                     | 0.13951   |           |          |
| 99 ->108                     | 0.65440   |           |          |
| 99 ->111                     | -0.11881  |           |          |
| Excited State 36: Singlet-A' | 5.8582 eV | 211.64 nm | f=0.0319 |
| 93 ->105                     | 0.11109   |           |          |
| 95 ->105                     | -0.12334  |           |          |
| 97 ->106                     | -0.25568  |           |          |
| 98 ->108                     | 0.16745   |           |          |
| 101 ->110                    | -0.10678  |           |          |
| 102 ->110                    | 0.18191   |           |          |
| 103 ->112                    | -0.19109  |           |          |
| 104 ->112                    | -0.16631  |           |          |
| 104 ->113                    | 0.44254   |           |          |
| Excited State 37: Singlet-A' | 5.8768 eV | 210.97 nm | f=0.0212 |
| 92 ->105                     | -0.16298  |           |          |
| 97 ->106                     | 0.31366   |           |          |
| 100 ->107                    | 0.11127   |           |          |
| 101 ->109                    | -0.11095  |           |          |
| 102 ->109                    | 0.13485   |           |          |
| 102 ->110                    | 0.33282   |           |          |
| 103 ->111                    | 0.25795   |           |          |
| 103 ->112                    | 0.21908   |           |          |
| 104 ->112                    | 0.10927   |           |          |
| Excited State 38: Singlet-A" | 5.9934 eV | 206.87 nm | f=0.0000 |
| 91 ->105                     | -0.17329  |           |          |
| 94 ->105                     | 0.65866   |           |          |
| Excited State 39: Singlet-A' | 6.0325 eV | 205.53 nm | f=0.0941 |
| 96 ->106                     | -0.13360  |           |          |
| 97 ->106                     | -0.13296  |           |          |
| 98 ->107                     | -0.20724  |           |          |
| 98 ->108                     | 0.20846   |           |          |
| 100 ->107                    | 0.36412   |           |          |
| 101 ->108                    | -0.15416  |           |          |
| 102 ->109                    | 0.19760   |           |          |
| 102 ->110                    | -0.14579  |           |          |
| 104 ->113                    | -0.26055  |           |          |
| Excited State 40: Singlet-A' | 6.0471 eV | 205.03 nm | f=0.0785 |
| 93 ->105                     | 0.25636   |           |          |
| 96 ->106                     | 0.11046   |           |          |
| 98 ->107                     | -0.16345  |           |          |
| 100 ->107                    | 0.17645   |           |          |
| 101 ->109                    | 0.15605   |           |          |
| 102 ->109                    | -0.13722  |           |          |
| 102 ->110                    | -0.13252  |           |          |
| 103 ->112                    | 0.44231   |           |          |
| 104 ->113                    | 0.14590   |           |          |

## 7. Full Listing for Text Reference (11)

M. J. Frisch, G. W. Trucks, H. B. Schlegel, G. E. Scuseria, M. A. Robb, J. R. Cheeseman, J. A. Montgomery, Jr., T. Vreven, K. N. Kudin, J. C. Burant, J. M. Millam, S. S. Iyengar, J. Tomasi, V. Barone, B. Mennucci, M. Cossi, G. Scalmani, N. Rega, G. A. Petersson, H. Nakatsuji, M. Hada, M. Ehara, K. Toyota, R. Fukuda, J. Hasegawa, M. Ishida, T. Nakajima, Y. Honda, O. Kitao, H. Nakai, M. Klene, X. Li, J. E. Knox, H. P. Hratchian, J. B. Cross, V. Bakken, C. Adamo, J. Jaramillo, R. Gomperts, R. E. Stratmann, O. Yazyev, A. J. Austin, R. Cammi, C. Pomelli, J. W. Ochterski, P. Y. Ayala, K. Morokuma, G. A. Voth, P. Salvador, J. J. Dannenberg, V. G. Zakrzewski, S. Dapprich, A. D. Daniels, M. C. Strain, O. Farkas, D. K. Malick, A. D. Rabuck, K. Raghavachari, J. B. Foresman, J. V. Ortiz, Q. Cui, A. G. Baboul, S. Clifford, J. Cioslowski, B. B. Stefanov, G. Liu, A. Liashenko, P. Piskorz, I. Komaromi, R. L. Martin, D. J. Fox, T. Keith, M. A. Al-Laham, C. Y. Peng, A. Nanayakkara, M. Challacombe, P. M. W. Gill, B. Johnson, W. Chen, M. W. Wong, C. Gonzalez, and J. A. Pople, Gaussian, Inc., Wallingford CT, 2004.
